# Supplementary material
Source: PubMed Central journal article supplement (PMC4126838)
Supplement: ac501358z_si_001.pdf [file ac501358z_si_001.pdf]

## Supporting Information

# Automated LC-HRMS(/MS) approach for the annotation of fragment ions derived from stable isotope labeling-assisted untargeted metabolomics

*Nora K. N. Neumann<sup>1</sup>, Sylvia M. Lehner<sup>1</sup>, Bernhard Kluger<sup>1</sup>, Christoph Bueschl<sup>1</sup>, Karoline Sedelmaier<sup>1</sup>, Marc Lemmens<sup>2</sup>, Rudolf Krška<sup>1</sup>, Rainer Schuhmacher<sup>1\*</sup>*

<sup>1</sup>Center for Analytical Chemistry, <sup>2</sup>Institute for Biotechnology in Plant Production, Department for Agrobiotechnology (IFA-Tulln), University of Natural Resources and Life Sciences Vienna (BOKU), Konrad Lorenz Strasse 20, 3430 Tulln, Austria.

\* corresponding author: Tel.: +43-2272-66280-407, Fax: +43-2272-66280-403, [rainer.schuhmacher@boku.ac.at](mailto:rainer.schuhmacher@boku.ac.at)

**Keywords:** LC-HRMS/MS, LTQ Orbitrap XL, metabolite identification, stable isotope labeling, tandem mass spectrometry

## Table of content

|                                                                                                                                              |    |
|----------------------------------------------------------------------------------------------------------------------------------------------|----|
| Distribution of mass accuracy intervals of $^{12}\text{C}$ fragment signals.....                                                             | 3  |
| Distribution of mass accuracy of $^{13}\text{C}$ fragment signals. ....                                                                      | 4  |
| Distribution of mass accuracy intervals of $^{12}\text{C}$ and $^{13}\text{C}$ fragment signals based on the rules of error propagation..... | 5  |
| Product ion spectra of native 3AcDON and U- $^{13}\text{C}$ -labeled 3AcDON standard .....                                                   | 6  |
| List of automatically obtained fragment ions for 3AcDON standard solution.....                                                               | 6  |
| Fungal metabolite standards spiked into <i>Fusarium</i> culture samples.....                                                                 | 8  |
| <b>3AcDON</b> .....                                                                                                                          | 9  |
| <b>DIAS</b> .....                                                                                                                            | 13 |
| <b>T-2</b> .....                                                                                                                             | 14 |
| <b>HT-2</b> .....                                                                                                                            | 20 |
| <b>ZEN</b> .....                                                                                                                             | 24 |
| <b>FB3</b> .....                                                                                                                             | 28 |
| <b>GRIS</b> .....                                                                                                                            | 31 |
| <b>STER</b> .....                                                                                                                            | 37 |
| <b>FB1</b> .....                                                                                                                             | 41 |
| <b>FB2</b> .....                                                                                                                             | 46 |
| Results of selected unknown metabolites of a <i>Fusarium graminearum</i> culture filtrate sample....                                         | 52 |

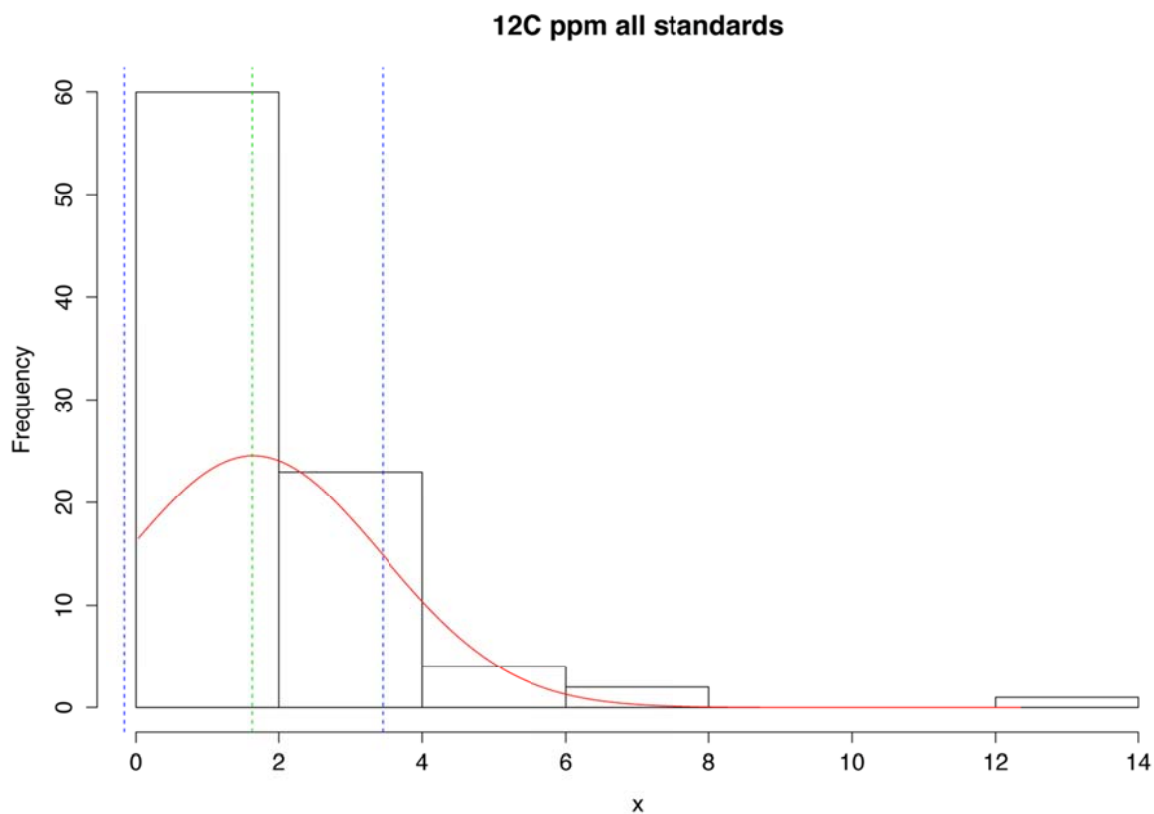

**Figure S-1. Distribution of mass accuracy intervals of <sup>12</sup>C fragment signals.** The histogram shows the distribution of all calculated mass deviations [ppm] of all manually annotated signals. The mass accuracy was calculated by comparing the measured mass of the fragment signal to the calculated exact mass. This was done for all manually annotated fragment signals of all product ion spectra (all standard substances). The green dashed line depicts the mean of a normal distribution of all ppm errors. The blue dashed lines show the mean  $\pm 1$  \* the standard deviation.

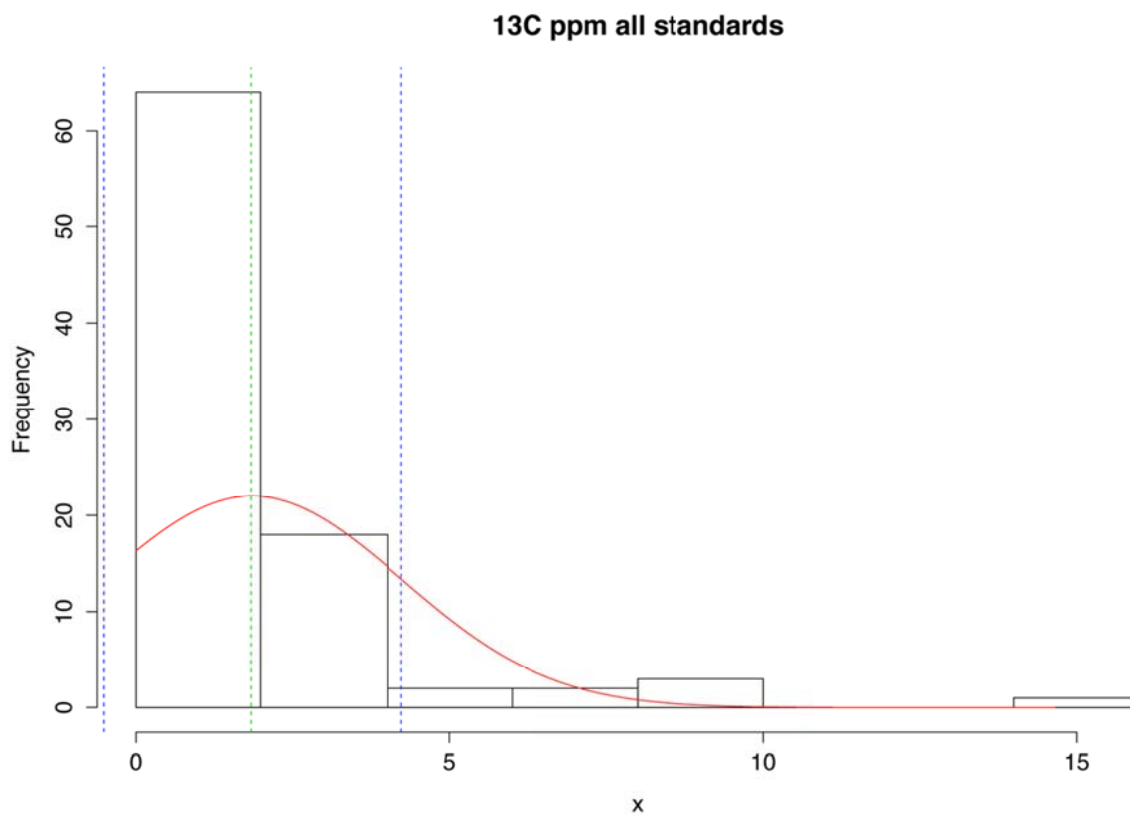

**Figure S-2. Distribution of mass accuracy of <sup>13</sup>C fragment signals.** The histogram shows the distribution of all calculated mass deviations [ppm] of all manually annotated signals. The mass accuracy was calculated by comparing the accurate mass of the fragment signal to the exact mass, which was calculated based on the molecular formula of the fragment signal. This was done for all manually annotated fragment signals of all product ion spectra. The green dashed line depicts the mean of a normal distribution of all ppm errors. The blue dashed lines show the mean  $\pm 1$  \* the standard deviation.

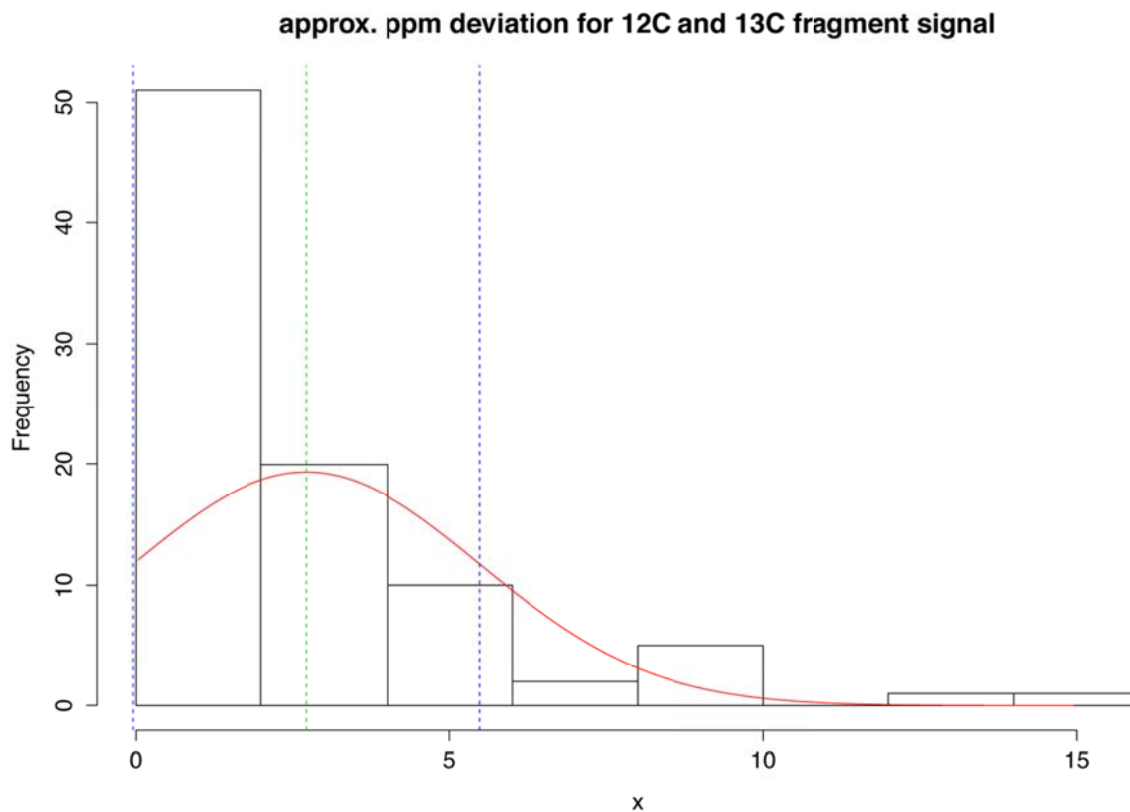

**Figure S-3. Distribution of mass accuracy intervals of  $^{12}\text{C}$  and  $^{13}\text{C}$  fragment signals based on the rules of error propagation.** For the inter-spectrum comparison, the tolerance of the  $m/z$  difference window between  $^{12}\text{C}$  and potentially corresponding MS/MS signals has to be chosen based on the fragment mass accuracies of both  $^{12}\text{C}$  and corresponding U- $^{13}\text{C}$  fragment ions. Here the distribution of mass accuracy intervals of the  $m/z$  values is shown.

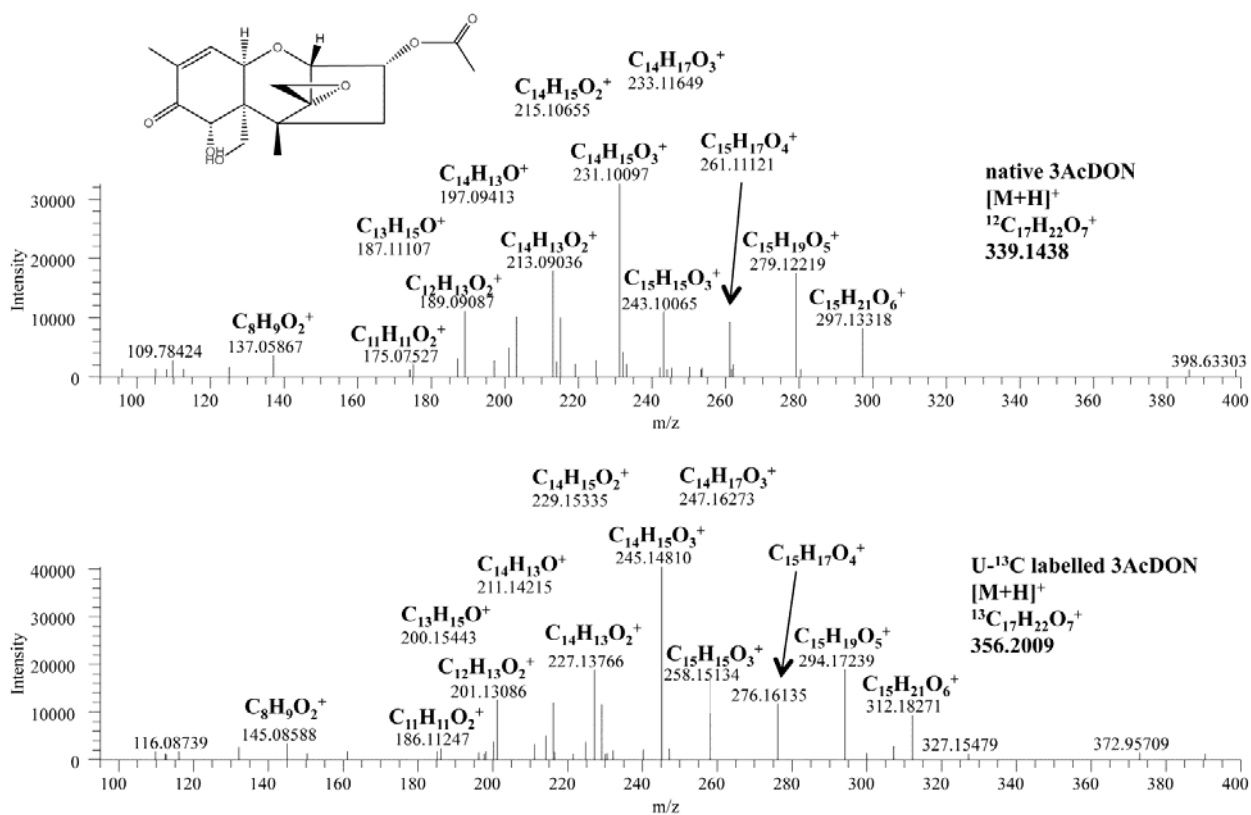

**Figure S-4. Collision-induced dissociation (CID) product ion spectra of native 3AcDON and U-<sup>13</sup>C-labeled 3AcDON standard.** Molecular formulas for selected fragment signals are given for mass deviations below 10 ppm and were determined manually. Structure formula of 3AcDON is shown in the upper left corner.

**Table S-1.** Fragments and corresponding elemental compositions for MS/MS fragments of 3AcDON (C<sub>17</sub>H<sub>22</sub>O<sub>7</sub>) derived from automated data evaluation by FragExtract, all of which have been manually verified.

| No. | Molecular formula                              | Relative abundan | $m/z$ meas <sup>a</sup> | $\Delta m/z$ | n(C) |
|-----|------------------------------------------------|------------------|-------------------------|--------------|------|
| 1   | C <sub>12</sub> H <sub>13</sub> O              | 4.5              | 173.0950                | 6.2          | 12   |
| 2   | C <sub>11</sub> H <sub>11</sub> O <sub>2</sub> | 7.5              | 175.0754                | 0.2          | 11   |
| 3   | C <sub>13</sub> H <sub>15</sub> O              | 8.4              | 187.1109                | 4.6          | 13   |
| 4   | C <sub>12</sub> H <sub>13</sub> O <sub>2</sub> | 30.8             | 189.0905                | 2.7          | 12   |
| 5   | C <sub>14</sub> H <sub>13</sub> O              | 6.0              | 197.0957                | 2.2          | 14   |
| 6   | C <sub>13</sub> H <sub>13</sub> O <sub>2</sub> | 9.1              | 201.0905                | 2.6          | 13   |
| 7   | C <sub>13</sub> H <sub>15</sub> O <sub>2</sub> | 26.4             | 203.1054                | 6.2          | 13   |
| 8   | C <sub>14</sub> H <sub>13</sub> O <sub>2</sub> | 45.1             | 213.0901                | 4.48         | 14   |
| 9   | C <sub>14</sub> H <sub>15</sub> O <sub>2</sub> | 29.8             | 215.1055                | 5.2          | 14   |
| 10  | C <sub>15</sub> H <sub>13</sub> O <sub>2</sub> | 5.2              | 225.0916                | 2.6          | 15   |
| 11  | C <sub>14</sub> H <sub>15</sub> O <sub>3</sub> | 100.0            | 231.1009                | 3.0          | 14   |
| 12  | C <sub>14</sub> H <sub>17</sub> O <sub>3</sub> | 6.9              | 233.1169                | 1.5          | 14   |
| 13  | C <sub>15</sub> H <sub>15</sub> O <sub>3</sub> | 21.9             | 243.1009                | 2.7          | 15   |
| 14  | C <sub>15</sub> H <sub>17</sub> O <sub>4</sub> | 30.4             | 261.1115                | 2.4          | 15   |
| 15  | C <sub>15</sub> H <sub>19</sub> O <sub>5</sub> | 46.6             | 279.1219                | 2.7          | 15   |
| 16  | C <sub>16</sub> H <sub>19</sub> O <sub>5</sub> | 5.6              | 291.1226                | 0.3          | 16   |
| 17  | C <sub>16</sub> H <sub>21</sub> O <sub>5</sub> | 2.2              | 293.1357                | 9.0          | 16   |
| 18  | C <sub>15</sub> H <sub>21</sub> O <sub>6</sub> | 21.5             | 297.1325                | 1.6          | 15   |

<sup>a</sup> $m/z$  meas = measured  $m/z$  of fragment in MS/MS spectrum; The fragment number (No.) corresponds to the fragments highlighted in Figure 1. Molecular formulas were calculated by FragExtract with the element list of C, H, N, O, Cl, S and P. The maximum atom count of those 7 elements was derived as described in Table 1 by Kind and Fiehn ( $m/z < 500$  Da: max. C: 39, max. H: 72, max. N: 20, max. O: 20, max. P: 9, max. S: 10;  $m/z < 1000$  Da: max. C: 78, max. H: 126, max. N: 20, max. O: 27, max. P: 9, max. S: 14).

**Table S-2 Summary of results for spiked *Fusarium* culture filtrates.**

| Standard compound | High concentration (c = 1mg/L) | Lowest concentration (mg/L)               |
|-------------------|--------------------------------|-------------------------------------------|
|                   | # detected/ # annotated        | concentration /# detected/<br># annotated |
| 3AcDON            | 39/ 17                         | 0.1/ 16/ 1                                |
| DIAS              | 26/ 3                          | 0.7/ 26/ 1                                |
| T-2               | 74/ 10                         | 0.001/ 15/ 1                              |
| HT-2              | 41/ 4                          | 0.001/ 15/ 1                              |
| ZEN               | 87 / 12                        | 0.02/ 12/ 1                               |
| FB3               | 15/ 7                          | 0.4/ 11/ 2                                |
| GRIS              | 40/ 7                          | 0.001/ 18/ 1                              |
| STER              | 29/ 6                          | 0.02/ 21/ 2                               |
| FB1               | 63/ 15                         | 0.007/ 19/ 2                              |
| FB2               | 48/ 12                         | 0.007/ 17/ 2                              |

The number of signals that were detected in the raw LC-HRMS/MS spectra at the highest concentration level (c= ~1 mg/L) compared to the number of signals annotated by FragExtract is shown. Additionally the lowest concentration for each compound for which at least one fragment was still annotated is presented together with the total number of observed signals vs. the number of annotated fragments.



### 3AcDON

**Figure S-5.** Product ion spectra, fragment ion EICs and list of all FragExtract derived fragment ions for 3AcDON at a concentration level of  $c = 1.0$  mg/L

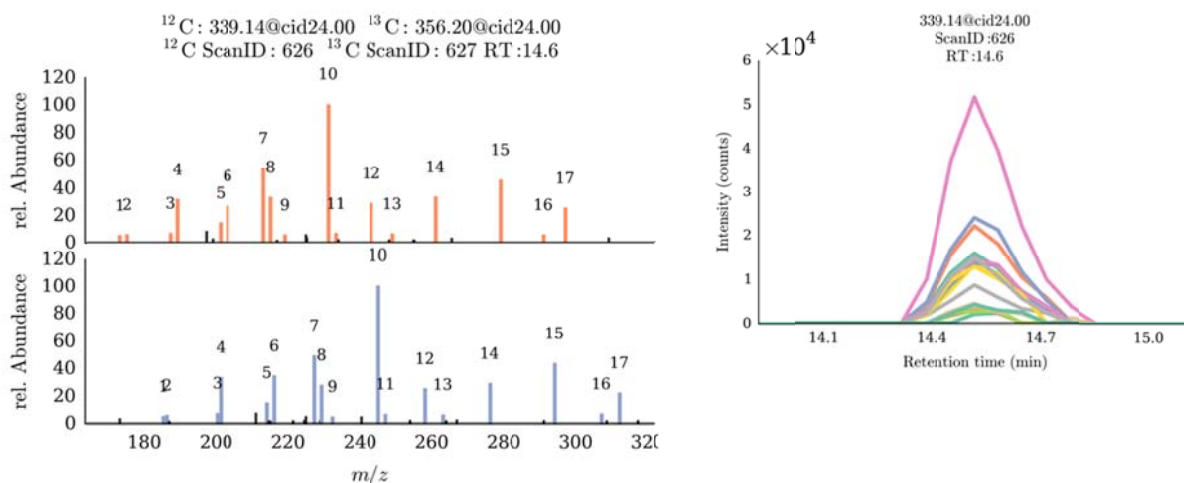

| No. | Molecular formula                      | Relative abundance [%] | $^{12}\text{C}$ $m/z$ | $^{13}\text{C}$ $m/z$ | ppm | n(C) |
|-----|----------------------------------------|------------------------|-----------------------|-----------------------|-----|------|
| 1   | $\text{C}_{12}\text{H}_{13}\text{O}$   | 4.17                   | 173.0966              | 185.1363              | 2.2 | 12   |
| 2   | $\text{C}_{11}\text{H}_{11}\text{O}_2$ | 4.81                   | 175.0759              | 186.1123              | 1.9 | 11   |
| 3   | $\text{C}_{13}\text{H}_{15}\text{O}$   | 5.83                   | 187.1123              | 200.1555              | 2.9 | 13   |
| 34  | $\text{C}_{12}\text{H}_{13}\text{O}_2$ | 30.77                  | 189.0916              | 201.1311              | 0.7 | 12   |
| 5   | $\text{C}_{13}\text{H}_{13}\text{O}_2$ | 13.47                  | 201.0916              | 214.1353              | 1.1 | 13   |
| 6   | $\text{C}_{13}\text{H}_{15}\text{O}_2$ | 26.02                  | 203.1072              | 216.1507              | 0.7 | 13   |
| 7   | $\text{C}_{14}\text{H}_{13}\text{O}_2$ | 53.55                  | 213.0916              | 227.1380              | 0.2 | 14   |
| 8   | $\text{C}_{14}\text{H}_{15}\text{O}_2$ | 32.40                  | 215.1072              | 229.1539              | 0.4 | 14   |
| 9   | $\text{C}_{13}\text{H}_{15}\text{O}_3$ | 4.57                   | 219.1021              | 232.1462              | 3.5 | 13   |
| 10  | $\text{C}_{14}\text{H}_{15}\text{O}_3$ | 100.00                 | 231.1021              | 245.1487              | 0.4 | 14   |
| 11  | $\text{C}_{14}\text{H}_{17}\text{O}_3$ | 5.54                   | 233.1178              | 247.1647              | 3.0 | 14   |
| 12  | $\text{C}_{15}\text{H}_{15}\text{O}_3$ | 27.97                  | 243.1021              | 258.1512              | 1.2 | 15   |
| 13  | $\text{C}_{14}\text{H}_{17}\text{O}_4$ | 5.29                   | 249.1127              | 263.1593              | 1.7 | 14   |
| 14  | $\text{C}_{15}\text{H}_{17}\text{O}_4$ | 32.63                  | 261.1127              | 276.1628              | 2.7 | 15   |
| 15  | $\text{C}_{15}\text{H}_{19}\text{O}_5$ | 45.15                  | 279.1233              | 294.1734              | 1.5 | 15   |
| 16  | $\text{C}_{16}\text{H}_{19}\text{O}_5$ | 4.67                   | 291.1233              | 307.1761              | 0.2 | 16   |
| 17  | $\text{C}_{15}\text{H}_{21}\text{O}_6$ | 24.41                  | 297.1338              | 312.1830              | 0.4 | 15   |

**Figure S-6.** Product ion spectra, fragment ion EICs and list of all FragExtract derived fragment ions for 3AcDON at a concentration level of  $c = 0.7$  mg/L

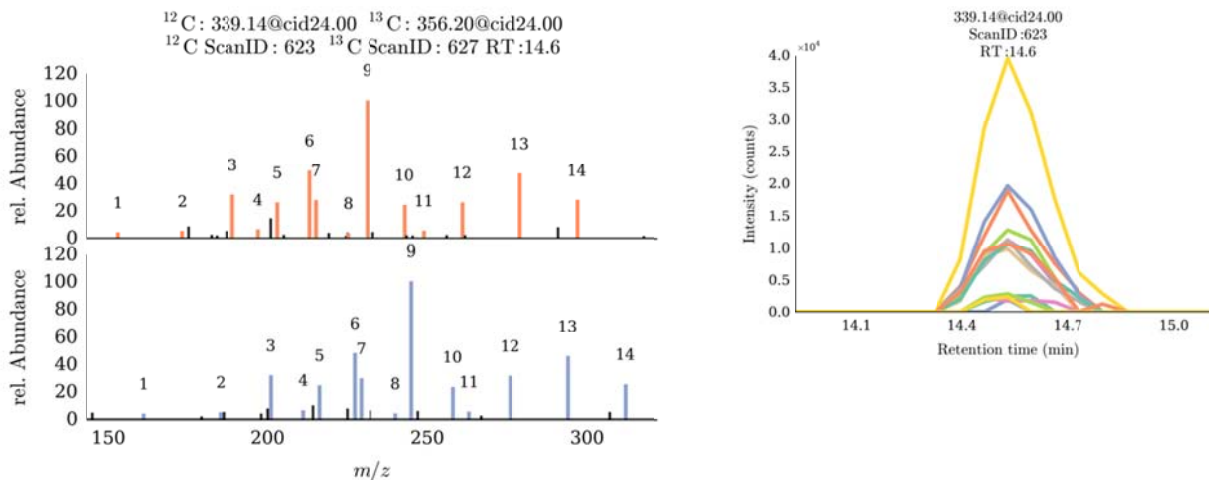

| No. | Molecular formula                              | Relative abundance [%] | <sup>12</sup> C $m/z$ | <sup>13</sup> C $m/z$ | ppm | n(C) |
|-----|------------------------------------------------|------------------------|-----------------------|-----------------------|-----|------|
| 1   | C <sub>8</sub> H <sub>9</sub> O <sub>3</sub>   | 3.09                   | 153.0553              | 161.0819              | 4.5 | 8    |
| 2   | C <sub>12</sub> H <sub>13</sub> O              | 4.07                   | 173.0965              | 185.1358              | 2.3 | 12   |
| 3   | C <sub>12</sub> H <sub>13</sub> O <sub>2</sub> | 30.87                  | 189.0913              | 201.1317              | 1.4 | 12   |
| 4   | C <sub>14</sub> H <sub>13</sub> O              | 5.25                   | 197.0957              | 211.1428              | 2.0 | 14   |
| 5   | C <sub>13</sub> H <sub>15</sub> O <sub>2</sub> | 25.17                  | 203.1073              | 216.1505              | 3.0 | 13   |
| 6   | C <sub>14</sub> H <sub>13</sub> O <sub>2</sub> | 48.66                  | 213.0910              | 227.1383              | 0.1 | 14   |
| 7   | C <sub>14</sub> H <sub>15</sub> O <sub>2</sub> | 26.73                  | 215.1068              | 229.1536              | 0.7 | 14   |
| 8   | C <sub>15</sub> H <sub>13</sub> O <sub>2</sub> | 2.44                   | 225.0911              | 240.1399              | 0.3 | 15   |
| 9   | C <sub>14</sub> H <sub>15</sub> O <sub>3</sub> | 100.00                 | 231.1019              | 245.1487              | 1.3 | 14   |
| 10  | C <sub>15</sub> H <sub>15</sub> O <sub>3</sub> | 23.26                  | 243.1014              | 258.1519              | 0.6 | 15   |
| 11  | C <sub>14</sub> H <sub>17</sub> O <sub>4</sub> | 4.29                   | 249.1115              | 263.1591              | 2.7 | 14   |
| 12  | C <sub>15</sub> H <sub>17</sub> O <sub>4</sub> | 25.17                  | 261.1127              | 276.1624              | 2.2 | 15   |
| 13  | C <sub>15</sub> H <sub>19</sub> O <sub>5</sub> | 46.57                  | 279.1231              | 294.1732              | 1.5 | 15   |
| 14  | C <sub>15</sub> H <sub>21</sub> O <sub>6</sub> | 26.94                  | 297.1337              | 312.1847              | 1.5 | 15   |

**Figure S-7.** Product ion spectra, fragment ion EICs and list of all FragExtract derived fragment ions for 3AcDON at a concentration level of  $c = 0.4 \text{ mg/L}$

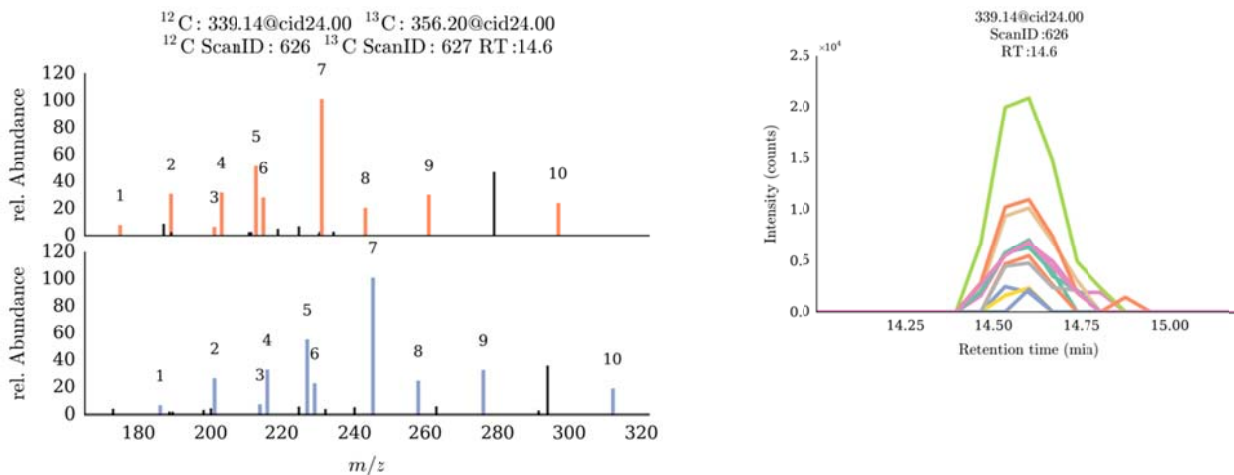

| No. | Molecular formula                              | Relative abundance [%] | <sup>12</sup> C $m/z$ | <sup>13</sup> C $m/z$ | ppm | n(C) |
|-----|------------------------------------------------|------------------------|-----------------------|-----------------------|-----|------|
| 1   | C <sub>11</sub> H <sub>11</sub> O <sub>2</sub> | 6.70                   | 175.0764              | 186.1128              | 5.9 | 11   |
| 2   | C <sub>12</sub> H <sub>13</sub> O <sub>2</sub> | 29.79                  | 189.0907              | 201.1308              | 1.4 | 12   |
| 3   | C <sub>13</sub> H <sub>13</sub> O <sub>2</sub> | 5.27                   | 201.0923              | 214.1356              | 6.3 | 13   |
| 4   | C <sub>13</sub> H <sub>15</sub> O <sub>2</sub> | 30.81                  | 203.1065              | 216.1503              | 0.8 | 13   |
| 5   | C <sub>14</sub> H <sub>13</sub> O <sub>2</sub> | 50.48                  | 213.0911              | 227.1380              | 0.3 | 14   |
| 6   | C <sub>14</sub> H <sub>15</sub> O <sub>2</sub> | 27.09                  | 215.1067              | 229.1532              | 0.3 | 14   |
| 7   | C <sub>14</sub> H <sub>15</sub> O <sub>3</sub> | 100.00                 | 231.1015              | 245.1485              | 0.1 | 14   |
| 8   | C <sub>15</sub> H <sub>15</sub> O <sub>3</sub> | 19.44                  | 243.1014              | 258.1522              | 0.7 | 15   |
| 9   | C <sub>15</sub> H <sub>17</sub> O <sub>4</sub> | 29.11                  | 261.1114              | 276.1626              | 2.7 | 15   |
| 10  | C <sub>15</sub> H <sub>21</sub> O <sub>6</sub> | 22.98                  | 297.1331              | 312.1839              | 0.5 | 15   |

**Figure S-8.** Product ion spectra, fragment ion EICs and list of all FragExtract derived fragment ions for 3AcDON at a concentration level of  $c = 0.1 \text{ mg/L}$

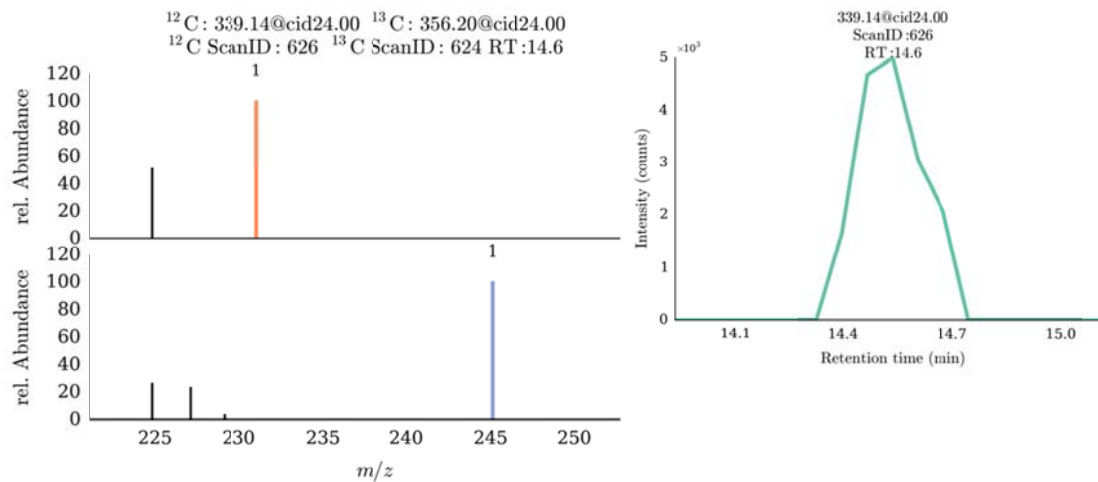

| No. | Molecular formula                      | Relative abundance [%] | $^{12}\text{C}$ $m/z$ | $^{13}\text{C}$ $m/z$ | ppm | $n(\text{C})$ |
|-----|----------------------------------------|------------------------|-----------------------|-----------------------|-----|---------------|
| 1   | $\text{C}_{14}\text{H}_{15}\text{O}_3$ | 100.00                 | 231.0996              | 245.1488              | 8.5 | 14            |

## DIAS

**Figure S-9.** Product ion spectra, fragment ion EICs and list of all FragExtract derived fragment ions for DIAS at a concentration level of  $c = 1.0$  mg/L

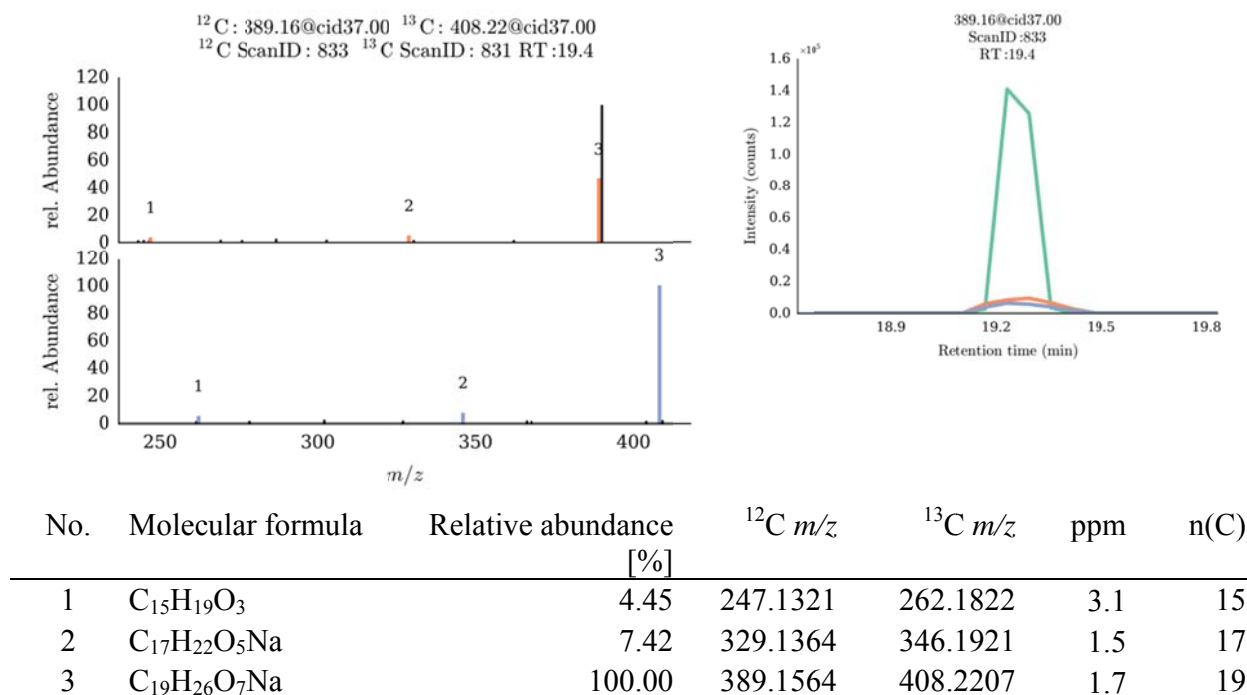

**Figure S-10.** Product ion spectra, fragment ion EICs and list of all FragExtract derived fragment ions for DIAS at a concentration level of  $c = 0.7$  mg/L

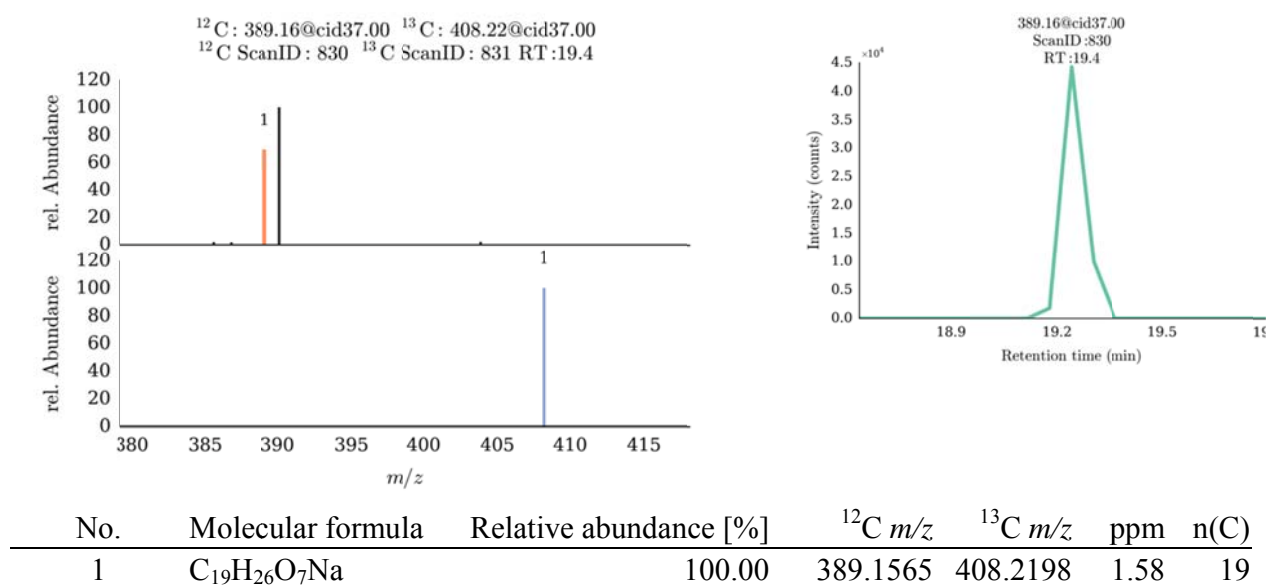

## T-2 toxin

**Figure S-11.** Product ion spectra, fragment ion EICs and list of all FragExtract derived fragment ions for T-2 toxin at a concentration level of  $c = 1.0$  mg/L

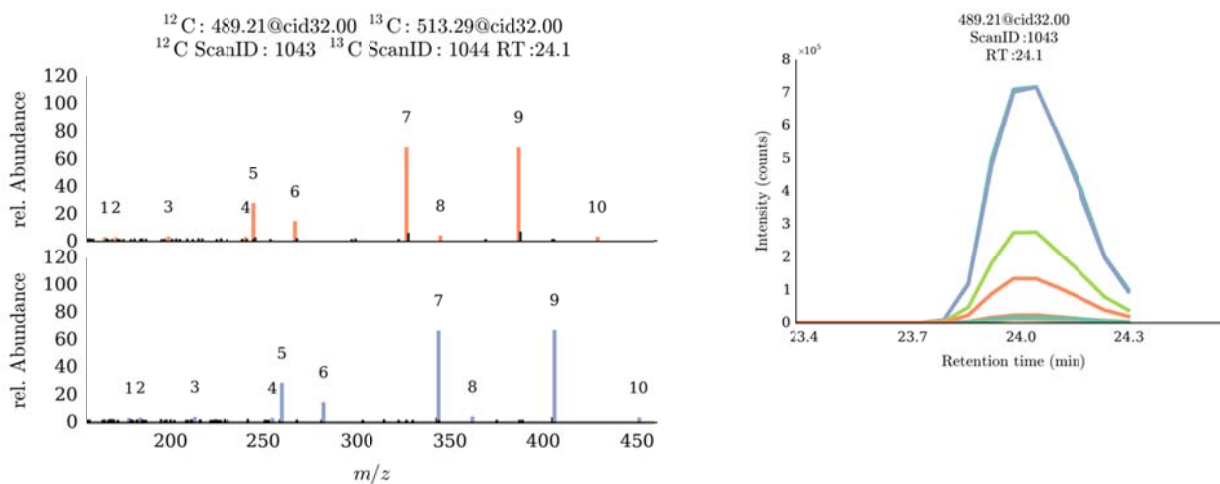

| No. | Molecular formula                                 | Relative abundance [%] | <sup>12</sup> C m/z | <sup>13</sup> C m/z | ppm | n(C) |
|-----|---------------------------------------------------|------------------------|---------------------|---------------------|-----|------|
| 1   | C <sub>13</sub> H <sub>9</sub>                    | 2.03                   | 165.0695            | 178.1130            | 2.4 | 13   |
| 2   | C <sub>13</sub> H <sub>15</sub>                   | 2.22                   | 171.1163            | 184.1602            | 3.2 | 13   |
| 3   | C <sub>14</sub> H <sub>15</sub> O                 | 3.05                   | 199.1114            | 213.1585            | 1.9 | 14   |
| 4   | C <sub>14</sub> H <sub>18</sub> O <sub>2</sub> Na | 2.25                   | 241.1192            | 255.1668            | 2.8 | 14   |
| 5   | C <sub>15</sub> H <sub>17</sub> O <sub>3</sub>    | 39.08                  | 245.1171            | 260.1673            | 0.6 | 15   |
| 6   | C <sub>15</sub> H <sub>16</sub> O <sub>3</sub> Na | 19.40                  | 267.0990            | 282.1494            | 0.6 | 15   |
| 7   | C <sub>17</sub> H <sub>20</sub> O <sub>5</sub> Na | 100.00                 | 327.1202            | 344.1773            | 0.4 | 17   |
| 8   | C <sub>17</sub> H <sub>22</sub> O <sub>6</sub> Na | 3.98                   | 345.1305            | 362.1879            | 1.2 | 17   |
| 9   | C <sub>19</sub> H <sub>24</sub> O <sub>7</sub> Na | 99.93                  | 387.1415            | 406.2050            | 0.1 | 19   |
| 10  | C <sub>22</sub> H <sub>30</sub> O <sub>7</sub> Na | 2.76                   | 429.1876            | 451.2633            | 1.8 | 22   |

**Figure S-12.** Product ion spectra, fragment ion EICs and list of all FragExtract derived fragment ions for T-2 toxin at a concentration level of  $c = 0.7$  mg/L

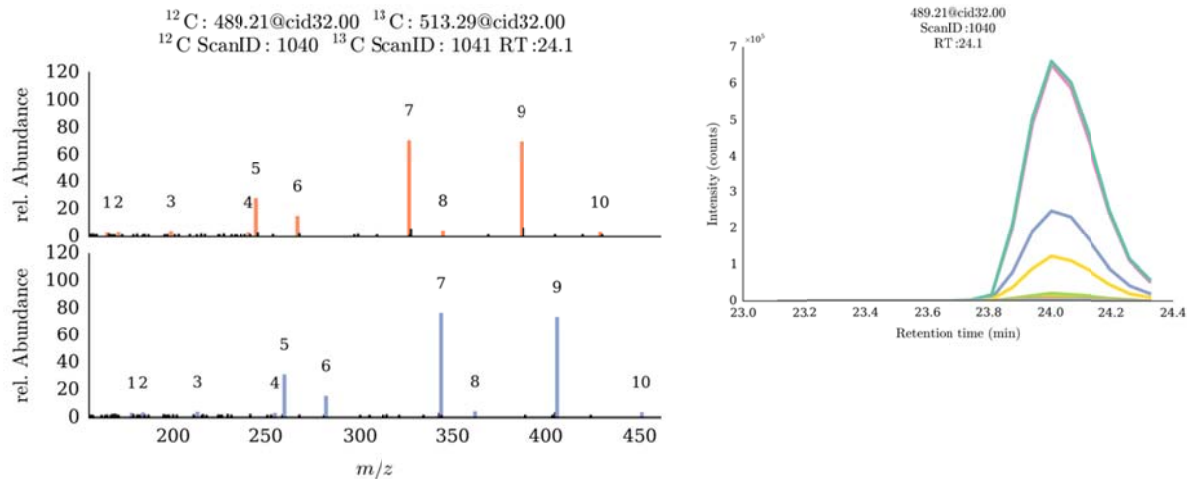

| No. | Molecular formula                               | Relative abundance [%] | $^{12}\text{C}$ $m/z$ | $^{13}\text{C}$ $m/z$ | ppm | n(C) |
|-----|-------------------------------------------------|------------------------|-----------------------|-----------------------|-----|------|
| 1   | $\text{C}_{13}\text{H}_9$                       | 2.15                   | 165.0696              | 178.1133              | 1.9 | 13   |
| 2   | $\text{C}_{13}\text{H}_{15}$                    | 2.39                   | 171.1161              | 184.1598              | 4.1 | 13   |
| 3   | $\text{C}_{14}\text{H}_{15}\text{O}$            | 3.21                   | 199.1113              | 213.1582              | 2.4 | 14   |
| 4   | $\text{C}_{14}\text{H}_{18}\text{O}_2\text{Na}$ | 2.21                   | 241.1196              | 255.1664              | 1.1 | 14   |
| 5   | $\text{C}_{15}\text{H}_{17}\text{O}_3$          | 38.13                  | 245.1168              | 260.1673              | 1.6 | 15   |
| 6   | $\text{C}_{15}\text{H}_{16}\text{O}_3\text{Na}$ | 19.35                  | 267.0988              | 282.1493              | 1.3 | 15   |
| 7   | $\text{C}_{17}\text{H}_{20}\text{O}_5\text{Na}$ | 100.00                 | 327.1200              | 344.1773              | 1.0 | 17   |
| 8   | $\text{C}_{17}\text{H}_{22}\text{O}_6\text{Na}$ | 3.87                   | 345.1304              | 362.1877              | 1.3 | 17   |
| 9   | $\text{C}_{19}\text{H}_{24}\text{O}_7\text{Na}$ | 98.65                  | 387.1412              | 406.2051              | 0.6 | 19   |
| 10  | $\text{C}_{22}\text{H}_{30}\text{O}_7\text{Na}$ | 2.53                   | 429.1874              | 451.2619              | 2.3 | 22   |

**Figure S-13.** Product ion spectra, fragment ion EICs and list of all FragExtract derived fragment ions for T-2 toxin at a concentration level of  $c = 0.4 \text{ mg/L}$

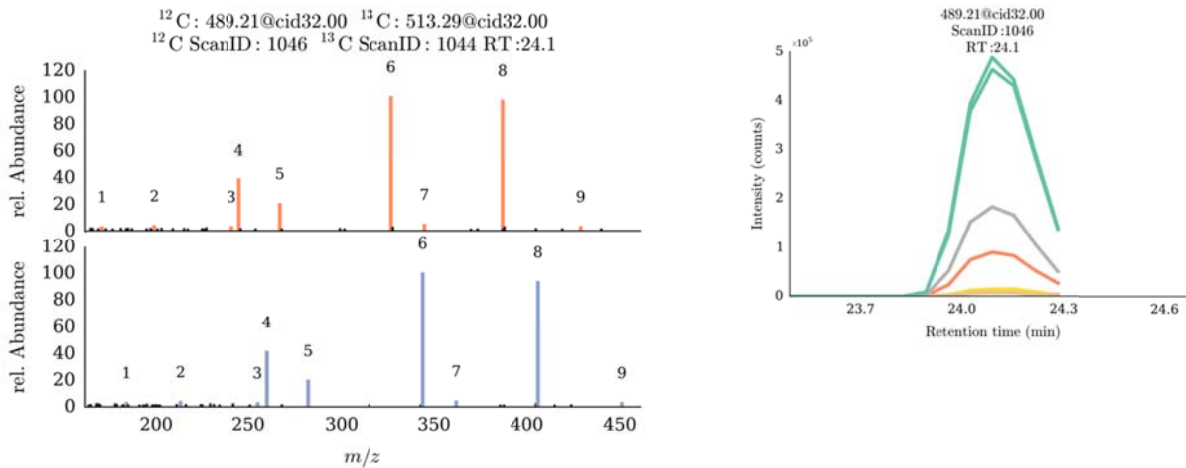

| No. | Molecular formula                                 | Relative abundance [%] | <sup>12</sup> C $m/z$ | <sup>13</sup> C $m/z$ | ppm | n(C) |
|-----|---------------------------------------------------|------------------------|-----------------------|-----------------------|-----|------|
| 1   | C <sub>13</sub> H <sub>15</sub>                   | 2.34                   | 171.1168              | 184.1601              | 0.1 | 13   |
| 2   | C <sub>14</sub> H <sub>15</sub> O                 | 3.03                   | 199.1112              | 213.1582              | 2.7 | 14   |
| 3   | C <sub>14</sub> H <sub>18</sub> O <sub>2</sub> Na | 2.29                   | 241.1203              | 255.1668              | 1.5 | 14   |
| 4   | C <sub>15</sub> H <sub>17</sub> O <sub>3</sub>    | 38.01                  | 245.1175              | 260.1676              | 1.2 | 15   |
| 5   | C <sub>15</sub> H <sub>16</sub> O <sub>3</sub> Na | 19.55                  | 267.0994              | 282.1496              | 0.9 | 15   |
| 6   | C <sub>17</sub> H <sub>20</sub> O <sub>5</sub> Na | 100.00                 | 327.1207              | 344.1775              | 1.1 | 17   |
| 7   | C <sub>17</sub> H <sub>22</sub> O <sub>6</sub> Na | 3.97                   | 345.1309              | 362.1880              | 0.0 | 17   |
| 8   | C <sub>19</sub> H <sub>24</sub> O <sub>7</sub> Na | 97.29                  | 387.1420              | 406.2053              | 1.4 | 19   |
| 9   | C <sub>22</sub> H <sub>30</sub> O <sub>7</sub> Na | 2.46                   | 429.1877              | 451.2622              | 1.5 | 22   |



**Figure S-14.** Product ion spectra, fragment ion EICs and list of all FragExtract derived fragment ions for T-2 toxin at a concentration level of  $c = 0.1 \text{ mg/L}$

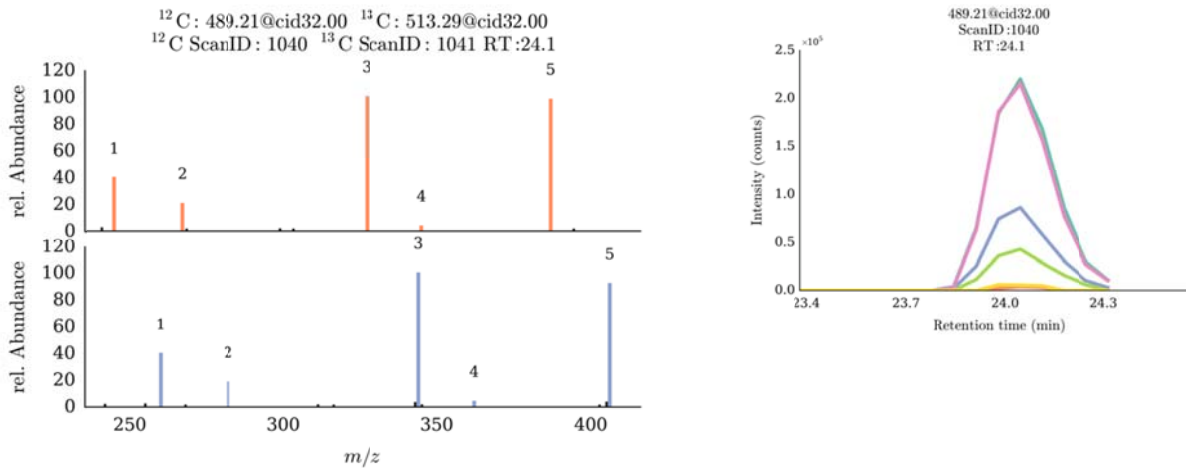

| No. | Molecular formula                               | Relative abundance [%] | $^{12}\text{C}$ $m/z$ | $^{13}\text{C}$ $m/z$ | ppm | n(C) |
|-----|-------------------------------------------------|------------------------|-----------------------|-----------------------|-----|------|
| 1   | $\text{C}_{15}\text{H}_{17}\text{O}_3$          | 39.28                  | 245.1173              | 260.1678              | 0.3 | 15   |
| 2   | $\text{C}_{15}\text{H}_{16}\text{O}_3\text{Na}$ | 19.77                  | 267.0991              | 282.1500              | 0.3 | 15   |
| 3   | $\text{C}_{17}\text{H}_{20}\text{O}_5\text{Na}$ | 100.00                 | 327.1204              | 344.1776              | 0.3 | 17   |
| 4   | $\text{C}_{17}\text{H}_{22}\text{O}_6\text{Na}$ | 2.96                   | 345.1301              | 362.1896              | 2.2 | 17   |
| 5   | $\text{C}_{19}\text{H}_{24}\text{O}_7\text{Na}$ | 98.09                  | 387.1417              | 406.2053              | 0.6 | 19   |

**Figure S-15.** Product ion spectra, fragment ion EICs and list of all FragExtract derived fragment ions for T-2 toxin at a concentration level of  $c = 0.02$  mg/L

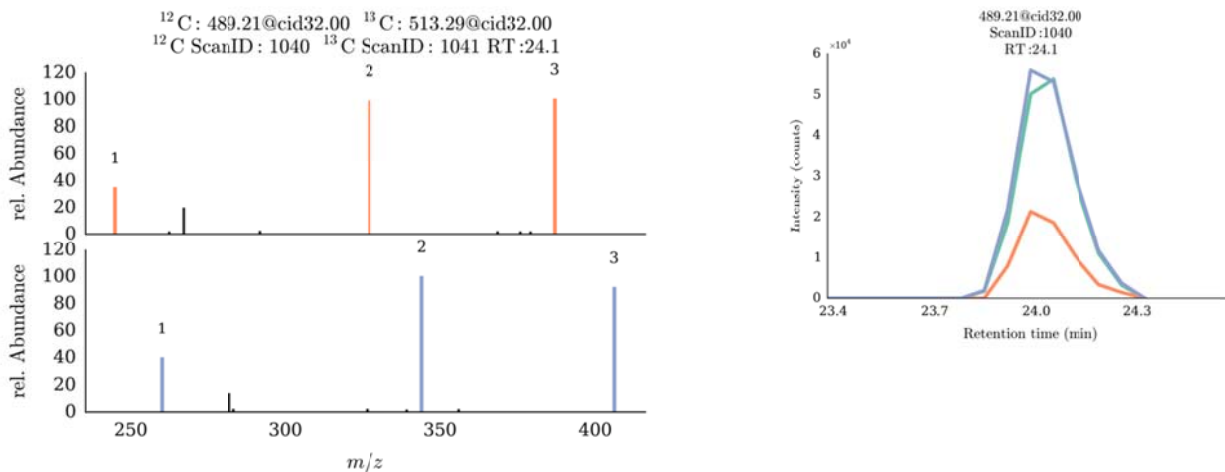

| No. | Molecular formula                                 | Relative abundance [%] | <sup>12</sup> C $m/z$ | <sup>13</sup> C $m/z$ | ppm | n(C) |
|-----|---------------------------------------------------|------------------------|-----------------------|-----------------------|-----|------|
| 1   | C <sub>15</sub> H <sub>17</sub> O <sub>3</sub>    | 33.91                  | 245.1171              | 260.1677              | 0.7 | 15   |
| 2   | C <sub>17</sub> H <sub>20</sub> O <sub>5</sub> Na | 98.69                  | 327.1204              | 344.1772              | 0.2 | 17   |
| 3   | C <sub>19</sub> H <sub>24</sub> O <sub>7</sub> Na | 100.00                 | 387.1414              | 406.2048              | 0.0 | 19   |

**Figure S-16.** Product ion spectra, fragment ion EICs and list of all FragExtract derived fragment ions for T-2 toxin at a concentration level of  $c = 0.007$  mg/L

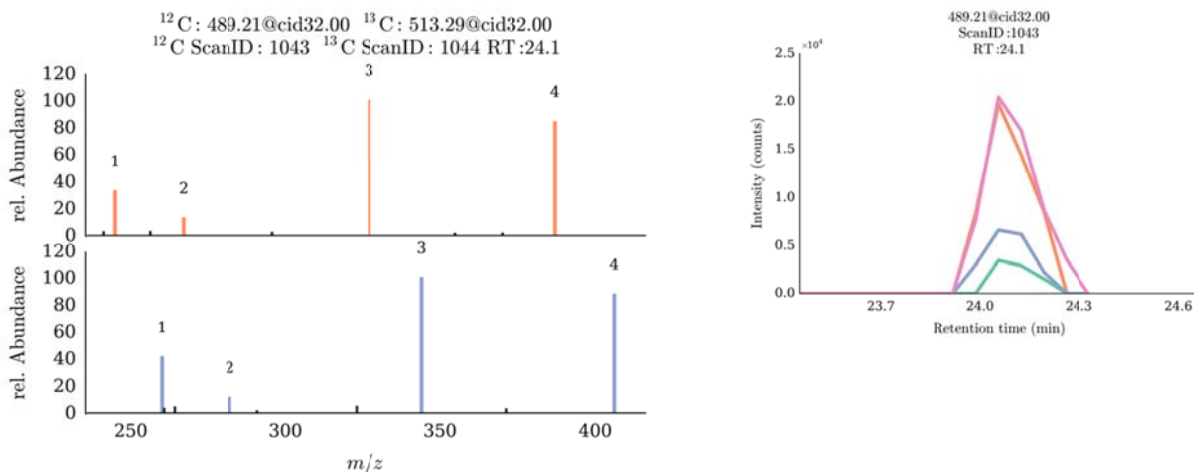

| No. | Molecular formula                                 | Relative abundance [%] | <sup>12</sup> C $m/z$ | <sup>13</sup> C $m/z$ | ppm | n(C) |
|-----|---------------------------------------------------|------------------------|-----------------------|-----------------------|-----|------|
| 1   | C <sub>15</sub> H <sub>17</sub> O <sub>3</sub>    | 32.43                  | 245.1164              | 260.1668              | 3.3 | 15   |
| 2   | C <sub>15</sub> H <sub>16</sub> O <sub>3</sub> Na | 12.26                  | 267.0991              | 282.1492              | 0.2 | 15   |
| 3   | C <sub>17</sub> H <sub>20</sub> O <sub>5</sub> Na | 100.00                 | 327.1205              | 344.1768              | 0.5 | 17   |
| 4   | C <sub>19</sub> H <sub>24</sub> O <sub>7</sub> Na | 84.15                  | 387.1414              | 406.2053              | 0.1 | 19   |

**Figure S-17.** Product ion spectra, fragment ion EICs and list of all FragExtract derived fragment ions for T-2 toxin at a concentration level of  $c = 0.001$  mg/L

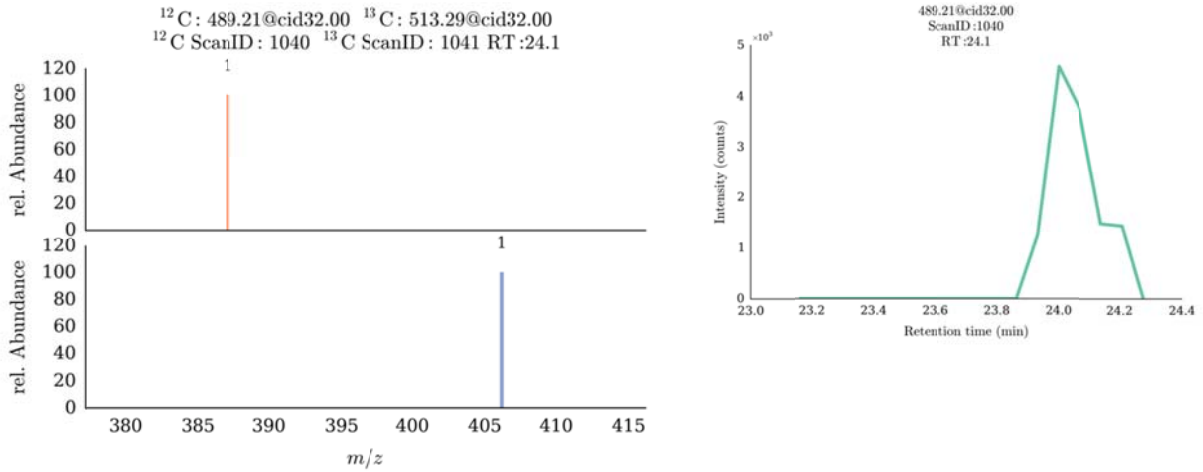

| No. | Molecular formula                                 | Relative abundance [%] | <sup>12</sup> C <i>m/z</i> | <sup>13</sup> C <i>m/z</i> | ppm | n(C) |
|-----|---------------------------------------------------|------------------------|----------------------------|----------------------------|-----|------|
| 1   | C <sub>19</sub> H <sub>24</sub> O <sub>7</sub> Na | 100.00                 | 387.1415                   | 406.2051                   | 0.1 | 19   |

## HT-2 toxin

**Figure S-18.** Product ion spectra, fragment ion EICs and list of all FragExtract derived fragment ions for HT-2 toxin at a concentration level of  $c = 1.0$  mg/L

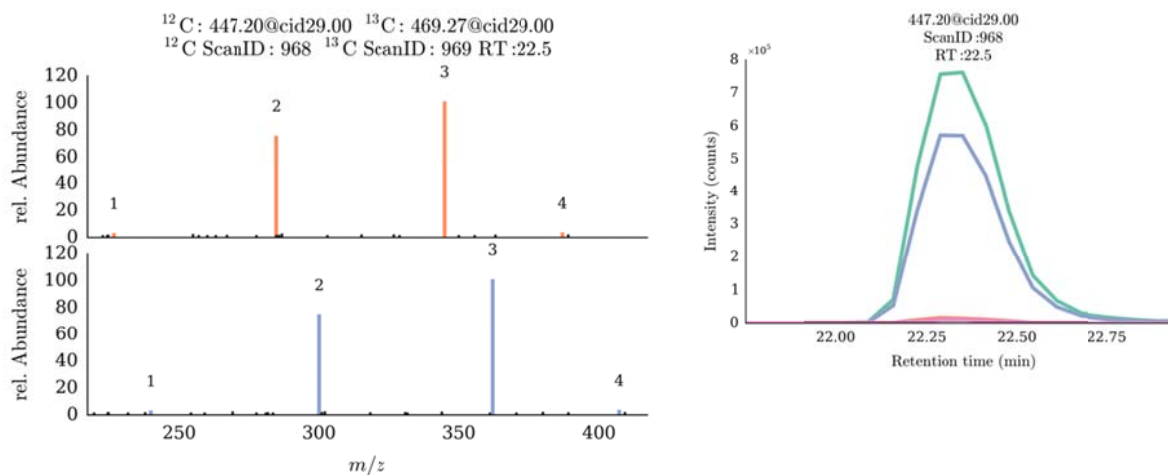

| No. | Molecular formula                                 | Relative abundance [%] | <sup>12</sup> C $m/z$ | <sup>13</sup> C $m/z$ | ppm | n(C) |
|-----|---------------------------------------------------|------------------------|-----------------------|-----------------------|-----|------|
| 1   | C <sub>13</sub> H <sub>16</sub> O <sub>2</sub> Na | 2.09                   | 227.1039              | 240.1475              | 1.8 | 13   |
| 2   | C <sub>15</sub> H <sub>18</sub> O <sub>4</sub> Na | 74.75                  | 285.1098              | 300.1599              | 0.3 | 15   |
| 3   | C <sub>17</sub> H <sub>22</sub> O <sub>6</sub> Na | 100.00                 | 345.1310              | 362.1879              | 0.3 | 17   |
| 4   | C <sub>20</sub> H <sub>28</sub> O <sub>6</sub> Na | 2.52                   | 387.1777              | 407.2443              | 0.3 | 20   |

**Figure S-19.** Product ion spectra, fragment ion EICs and list of all FragExtract derived fragment ions for HT-2 toxin at a concentration level of  $c = 0.7 \text{ mg/L}$

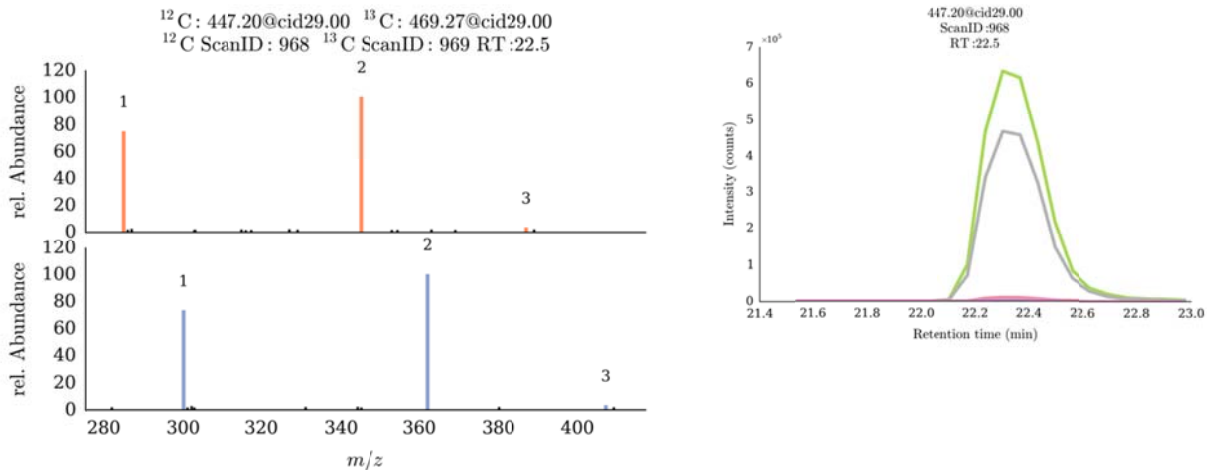

| No. | Molecular formula                               | Relative abundance [%] | $^{12}\text{C } m/z$ | $^{13}\text{C } m/z$ | ppm | n(C) |
|-----|-------------------------------------------------|------------------------|----------------------|----------------------|-----|------|
| 1   | $\text{C}_{15}\text{H}_{18}\text{O}_4\text{Na}$ | 74.56                  | 285.1100             | 300.1602             | 0.8 | 15   |
| 2   | $\text{C}_{17}\text{H}_{22}\text{O}_6\text{Na}$ | 100.00                 | 345.1311             | 362.1883             | 0.7 | 17   |
| 3   | $\text{C}_{20}\text{H}_{28}\text{O}_6\text{Na}$ | 2.37                   | 387.1772             | 407.2449             | 1.6 | 20   |

**Figure S-20.** Product ion spectra, fragment ion EICs and list of all FragExtract derived fragment ions for HT-2 toxin at a concentration level of  $c = 0.4 \text{ mg/L}$

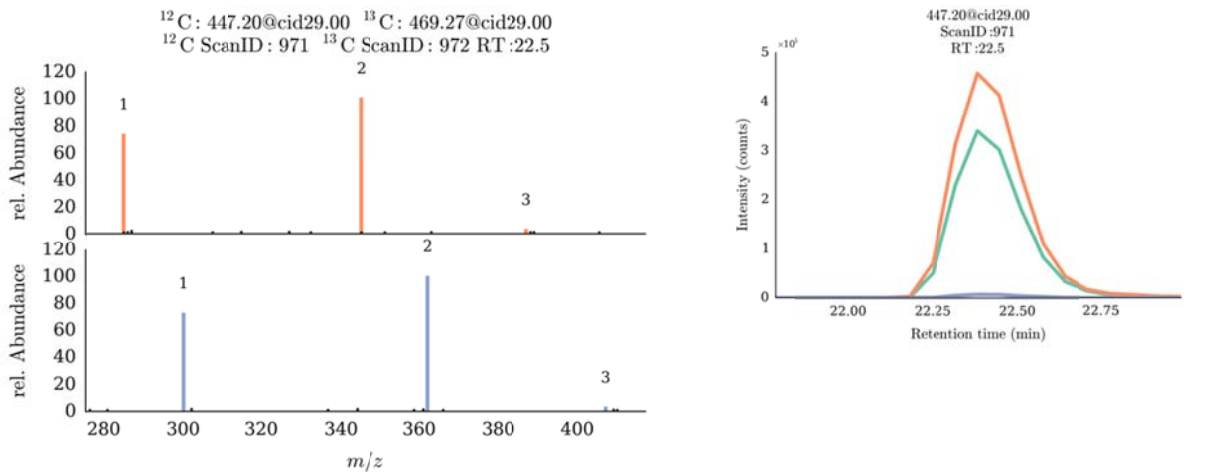

| No. | Molecular formula                               | Relative abundance [%] | $^{12}\text{C } m/z$ | $^{13}\text{C } m/z$ | ppm | n(C) |
|-----|-------------------------------------------------|------------------------|----------------------|----------------------|-----|------|
| 1   | $\text{C}_{15}\text{H}_{18}\text{O}_4\text{Na}$ | 73.27                  | 285.1101             | 300.1606             | 1.2 | 15   |
| 2   | $\text{C}_{17}\text{H}_{22}\text{O}_6\text{Na}$ | 100.00                 | 345.1313             | 362.1887             | 1.1 | 17   |
| 3   | $\text{C}_{20}\text{H}_{28}\text{O}_6\text{Na}$ | 2.20                   | 387.1785             | 407.2442             | 1.8 | 20   |

**Figure S-21.** Product ion spectra, fragment ion EICs and list of all FragExtract derived fragment ions for HT-2 toxin at a concentration level of  $c = 0.1$  mg/L

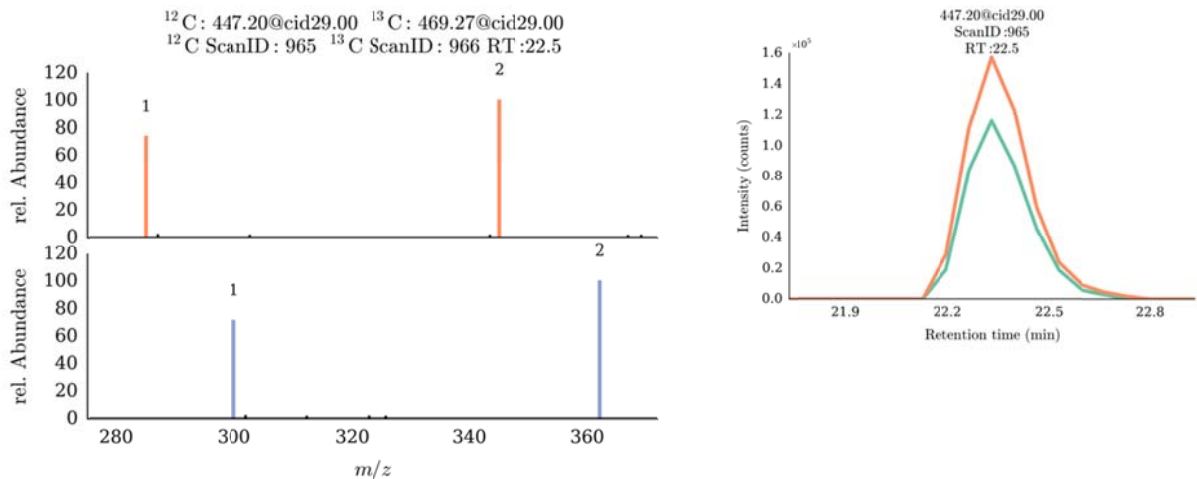

| No. | Molecular formula                               | Relative abundance [%] | $^{12}\text{C}$ $m/z$ | $^{13}\text{C}$ $m/z$ | ppm | n(C) |
|-----|-------------------------------------------------|------------------------|-----------------------|-----------------------|-----|------|
| 1   | $\text{C}_{15}\text{H}_{18}\text{O}_4\text{Na}$ | 73.59                  | 285.1100              | 300.1606              | 0.8 | 15   |
| 2   | $\text{C}_{17}\text{H}_{22}\text{O}_6\text{Na}$ | 100.00                 | 345.1310              | 362.1887              | 0.5 | 17   |

**Figure S-22.** Product ion spectra, fragment ion EICs and list of all FragExtract derived fragment ions for HT-2 toxin at a concentration level of  $c = 0.02$  mg/L

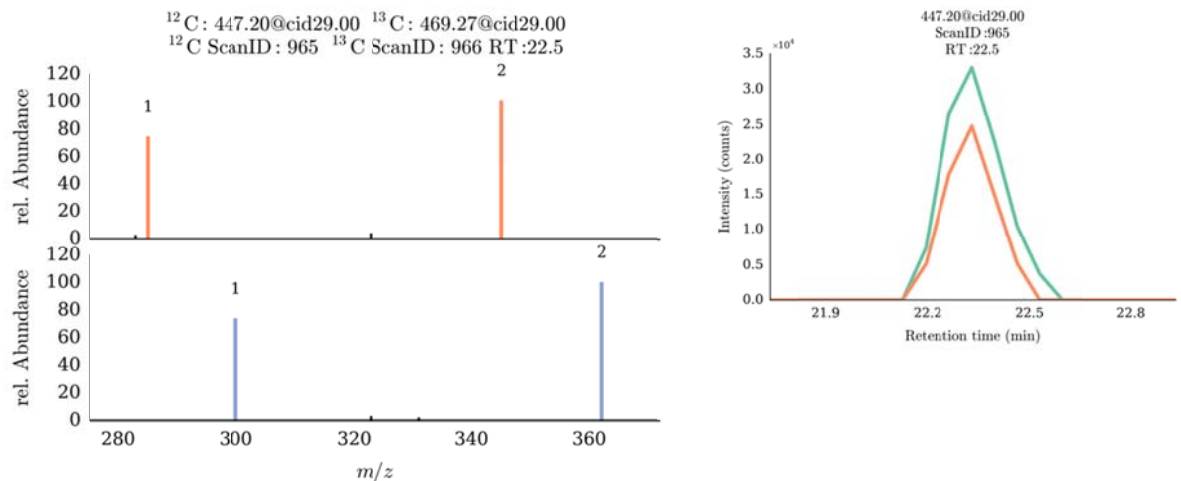

| No. | Molecular formula                               | Relative abundance [%] | $^{12}\text{C}$ $m/z$ | $^{13}\text{C}$ $m/z$ | ppm | n(C) |
|-----|-------------------------------------------------|------------------------|-----------------------|-----------------------|-----|------|
| 1   | $\text{C}_{15}\text{H}_{18}\text{O}_4\text{Na}$ | 74.04                  | 285.1096              | 300.1598              | 0.6 | 15   |
| 2   | $\text{C}_{17}\text{H}_{22}\text{O}_6\text{Na}$ | 100.00                 | 345.1304              | 362.1881              | 1.3 | 17   |

**Figure S-23.** Product ion spectra, fragment ion EICs and list of all FragExtract derived fragment ions for HT-2 toxin at a concentration level of  $c = 0.007$  mg/L

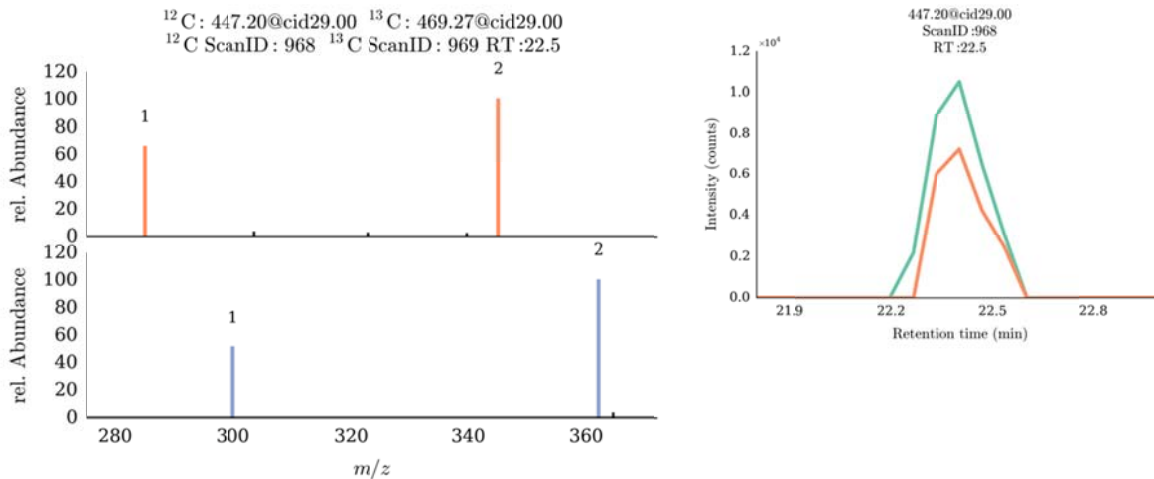

| No. | Molecular formula                               | Relative abundance [%] | $^{12}\text{C}$ $m/z$ | $^{13}\text{C}$ $m/z$ | ppm | n(C) |
|-----|-------------------------------------------------|------------------------|-----------------------|-----------------------|-----|------|
| 1   | $\text{C}_{15}\text{H}_{18}\text{O}_4\text{Na}$ | 65.56                  | 285.1102              | 300.1593              | 1.7 | 15   |
| 2   | $\text{C}_{15}\text{H}_{18}\text{O}_4\text{Na}$ | 100.00                 | 345.1316              | 362.1873              | 2.0 | 17   |

**Figure S-24.** Product ion spectra, fragment ion EICs and list of all FragExtract derived fragment ions for HT-2 toxin at a concentration level of  $c = 0.001$  mg/L

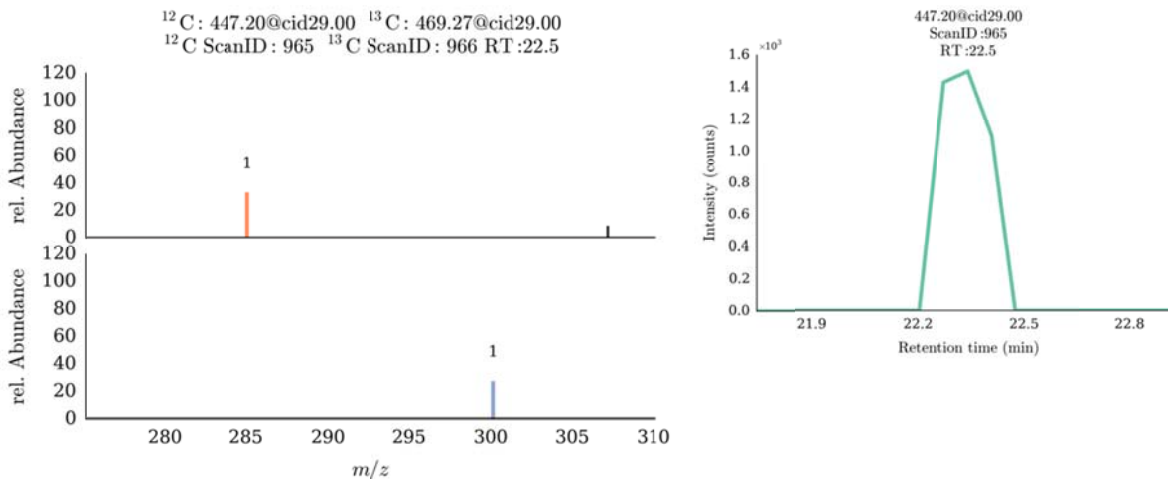

| No. | Molecular formula                               | Relative abundance [%] | $^{12}\text{C}$ $m/z$ | $^{13}\text{C}$ $m/z$ | ppm | n(C) |
|-----|-------------------------------------------------|------------------------|-----------------------|-----------------------|-----|------|
| 1   | $\text{C}_{15}\text{H}_{18}\text{O}_4\text{Na}$ | 31.84                  | 285.1107              | 300.1596              | 3.5 | 15   |

## ZEN

**Figure S-25.** Product ion spectra, fragment ion EICs and list of all FragExtract derived fragment ions for ZEN at a concentration level of  $c = 1.0$  mg/L

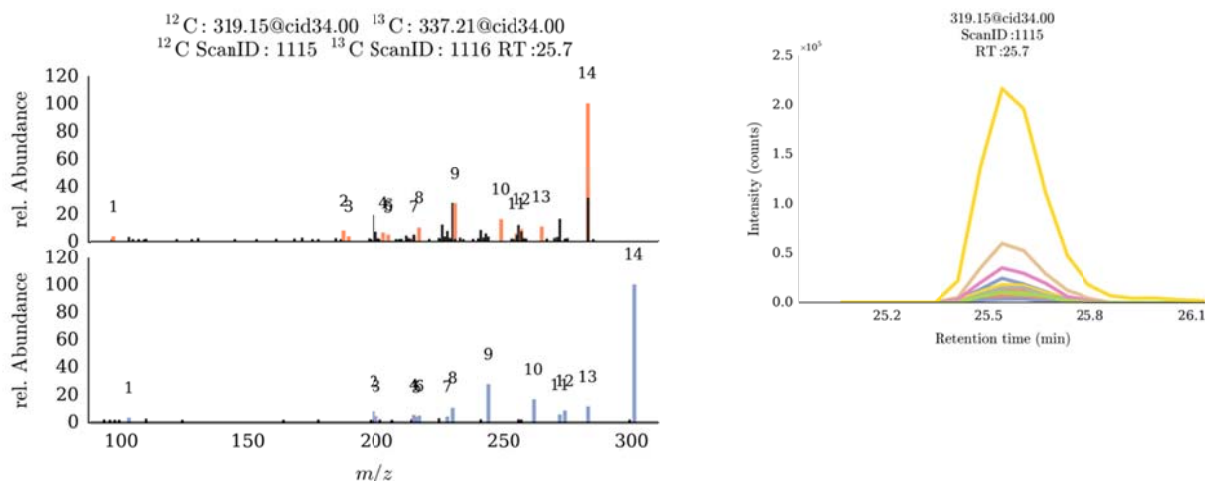

| No. | Molecular formula                              | Relative abundance [%] | <sup>12</sup> C m/z | <sup>13</sup> C m/z | ppm | n(C) |
|-----|------------------------------------------------|------------------------|---------------------|---------------------|-----|------|
| 1   | C <sub>6</sub> H <sub>9</sub> O                | 2.56                   | 97.0648             | 103.0841            | 0.0 | 6    |
| 2   | C <sub>12</sub> H <sub>11</sub> O <sub>2</sub> | 6.78                   | 187.0759            | 199.1156            | 3.1 | 12   |
| 3   | C <sub>11</sub> H <sub>9</sub> O <sub>3</sub>  | 2.67                   | 189.0544            | 200.0921            | 0.9 | 11   |
| 4   | C <sub>12</sub> H <sub>11</sub> O <sub>3</sub> | 5.23                   | 203.0704            | 215.1109            | 0.6 | 12   |
| 5   | C <sub>11</sub> H <sub>9</sub> O <sub>4</sub>  | 2.20                   | 205.0489            | 216.0867            | 3.2 | 11   |
| 6   | C <sub>12</sub> H <sub>13</sub> O <sub>3</sub> | 3.84                   | 205.0857            | 217.1261            | 1.0 | 12   |
| 7   | C <sub>13</sub> H <sub>11</sub> O <sub>3</sub> | 2.57                   | 215.0699            | 228.1125            | 1.5 | 13   |
| 8   | C <sub>13</sub> H <sub>13</sub> O <sub>3</sub> | 8.98                   | 217.0859            | 230.1296            | 0.0 | 13   |
| 9   | C <sub>13</sub> H <sub>11</sub> O <sub>4</sub> | 26.72                  | 231.0651            | 244.1088            | 0.2 | 13   |
| 10  | C <sub>13</sub> H <sub>13</sub> O <sub>5</sub> | 15.21                  | 249.0760            | 262.1191            | 0.9 | 13   |
| 11  | C <sub>17</sub> H <sub>19</sub> O <sub>2</sub> | 4.72                   | 255.1376            | 272.1955            | 1.4 | 17   |
| 12  | C <sub>17</sub> H <sub>21</sub> O <sub>2</sub> | 7.97                   | 257.1536            | 274.2106            | 0.1 | 17   |
| 13  | C <sub>18</sub> H <sub>17</sub> O <sub>2</sub> | 9.72                   | 265.1216            | 283.1831            | 2.5 | 18   |
| 14  | C <sub>18</sub> H <sub>19</sub> O <sub>3</sub> | 100.00                 | 283.1332            | 301.1935            | 1.1 | 18   |



**Figure S-26.** Product ion spectra, fragment ion EICs and list of all FragExtract derived fragment ions for ZEN at a concentration level of c =0.7 mg/L

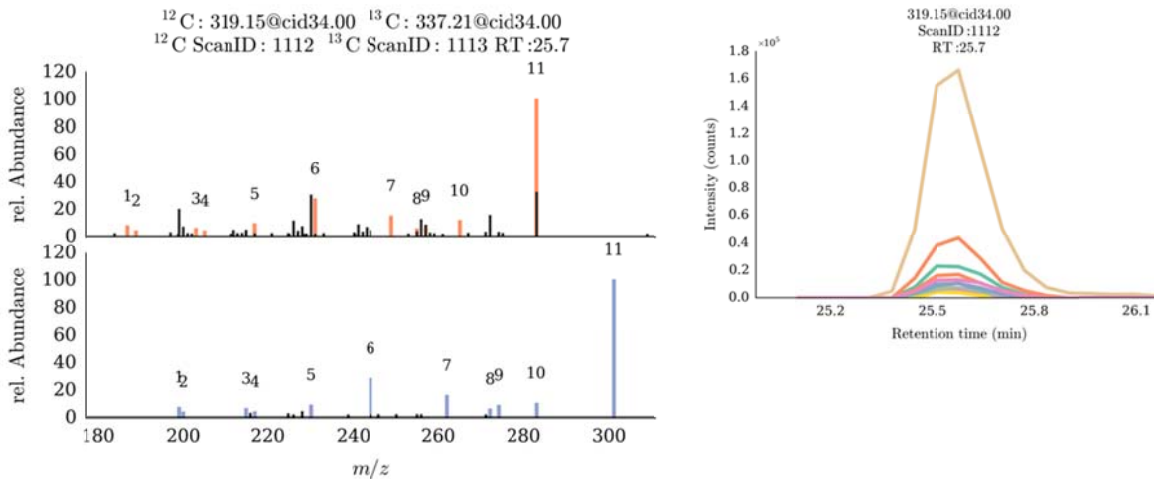

| No. | Molecular formula                              | Relative abundance [%] | <sup>12</sup> C m/z | <sup>13</sup> C m/z | ppm | n(C) |
|-----|------------------------------------------------|------------------------|---------------------|---------------------|-----|------|
| 1   | C <sub>12</sub> H <sub>11</sub> O <sub>2</sub> | 6.77                   | 187.0758            | 199.1155            | 2.4 | 12   |
| 2   | C <sub>11</sub> H <sub>9</sub> O <sub>3</sub>  | 3.17                   | 189.0550            | 200.0910            | 2.0 | 11   |
| 3   | C <sub>12</sub> H <sub>11</sub> O <sub>3</sub> | 4.71                   | 203.0700            | 215.1108            | 1.2 | 12   |
| 4   | C <sub>13</sub> H <sub>11</sub> O <sub>3</sub> | 2.67                   | 215.0707            | 228.1135            | 1.8 | 13   |
| 5   | C <sub>13</sub> H <sub>13</sub> O <sub>3</sub> | 8.28                   | 217.0859            | 230.1296            | 0.2 | 13   |
| 6   | C <sub>13</sub> H <sub>11</sub> O <sub>4</sub> | 26.63                  | 231.0652            | 244.1086            | 0.1 | 13   |
| 7   | C <sub>13</sub> H <sub>13</sub> O <sub>5</sub> | 14.03                  | 249.0759            | 262.1190            | 0.5 | 13   |
| 8   | C <sub>17</sub> H <sub>19</sub> O <sub>2</sub> | 4.66                   | 255.1378            | 272.1948            | 0.8 | 17   |
| 9   | C <sub>17</sub> H <sub>21</sub> O <sub>2</sub> | 6.62                   | 257.1543            | 274.2109            | 2.8 | 17   |
| 10  | C <sub>18</sub> H <sub>17</sub> O <sub>2</sub> | 10.61                  | 265.1224            | 283.1822            | 0.3 | 18   |
| 11  | C <sub>18</sub> H <sub>19</sub> O <sub>3</sub> | 100.00                 | 283.1332            | 301.1933            | 1.2 | 18   |

**Figure S-27.** Product ion spectra, fragment ion EICs and list of all FragExtract derived fragment ions for ZEN at a concentration level of  $c = 0.4$  mg/L

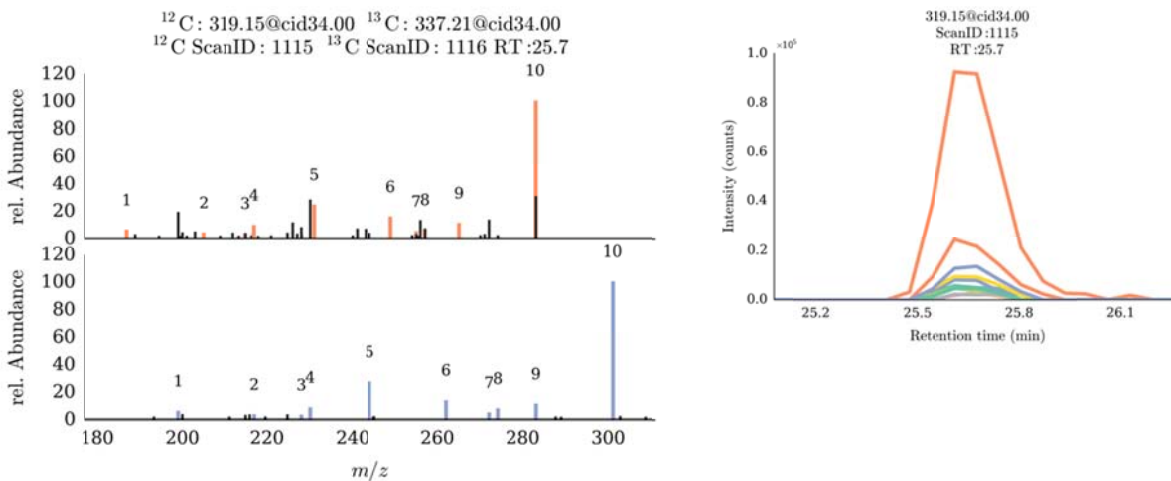

| No. | Molecular formula                      | Relative abundance [%] | $^{12}\text{C}$ $m/z$ | $^{13}\text{C}$ $m/z$ | ppm | n(C) |
|-----|----------------------------------------|------------------------|-----------------------|-----------------------|-----|------|
| 1   | $\text{C}_{12}\text{H}_{11}\text{O}_2$ | 5.06                   | 187.0747              | 199.1155              | 3.7 | 12   |
| 2   | $\text{C}_{12}\text{H}_{13}\text{O}_3$ | 2.98                   | 205.0843              | 217.1235              | 7.7 | 12   |
| 3   | $\text{C}_{13}\text{H}_{11}\text{O}_3$ | 2.58                   | 215.0700              | 228.1142              | 1.2 | 13   |
| 4   | $\text{C}_{13}\text{H}_{13}\text{O}_3$ | 8.47                   | 217.0855              | 230.1300              | 1.8 | 13   |
| 5   | $\text{C}_{13}\text{H}_{11}\text{O}_4$ | 23.60                  | 231.0653              | 244.1087              | 0.3 | 13   |
| 6   | $\text{C}_{13}\text{H}_{13}\text{O}_5$ | 14.70                  | 249.0758              | 262.1197              | 0.3 | 13   |
| 7   | $\text{C}_{17}\text{H}_{19}\text{O}_2$ | 3.95                   | 255.1376              | 272.1937              | 1.3 | 17   |
| 8   | $\text{C}_{17}\text{H}_{21}\text{O}_2$ | 5.21                   | 257.1538              | 274.2097              | 0.9 | 17   |
| 9   | $\text{C}_{18}\text{H}_{17}\text{O}_2$ | 9.99                   | 265.1220              | 283.1830              | 1.1 | 18   |
| 10  | $\text{C}_{18}\text{H}_{19}\text{O}_3$ | 100.00                 | 283.1331              | 301.1934              | 0.9 | 18   |

**Figure S-28.** Product ion spectra, fragment ion EICs and list of all FragExtract derived fragment ions for ZEN at a concentration level of  $c = 0.1$  mg/L

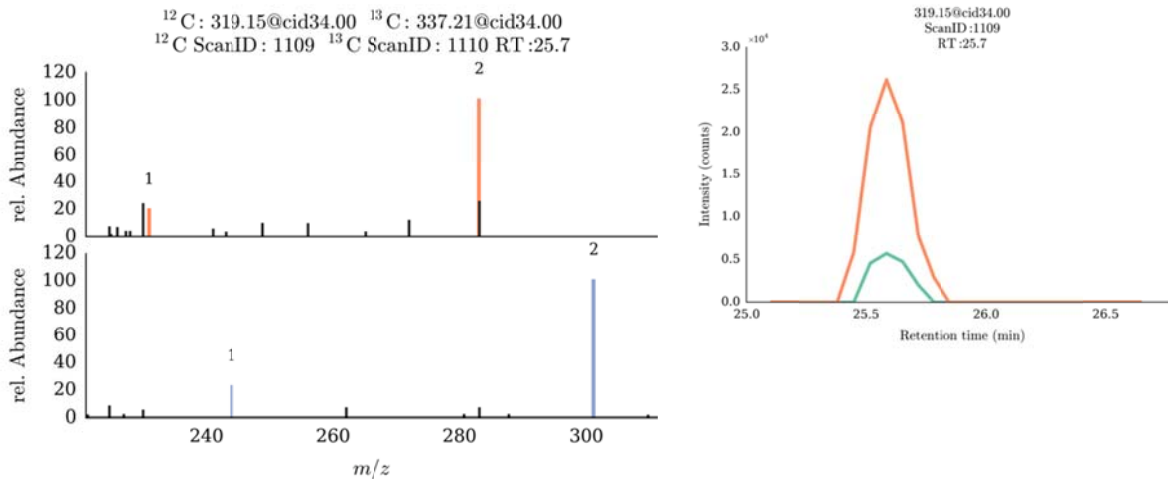

| No. | Molecular formula                      | Relative abundance [%] | $^{12}\text{C}$ $m/z$ | $^{13}\text{C}$ $m/z$ | ppm | n(C) |
|-----|----------------------------------------|------------------------|-----------------------|-----------------------|-----|------|
| 1   | $\text{C}_{13}\text{H}_{11}\text{O}_4$ | 19.36                  | 231.0661              | 244.1088              | 4.1 | 13   |
| 2   | $\text{C}_{18}\text{H}_{19}\text{O}_3$ | 100.00                 | 283.1333              | 301.1932              | 1.5 | 18   |

**Figure S-29.** Product ion spectra, fragment ion EICs and list of all FragExtract derived fragment ions for ZEN at a concentration level of  $c = 0.02$  mg/L

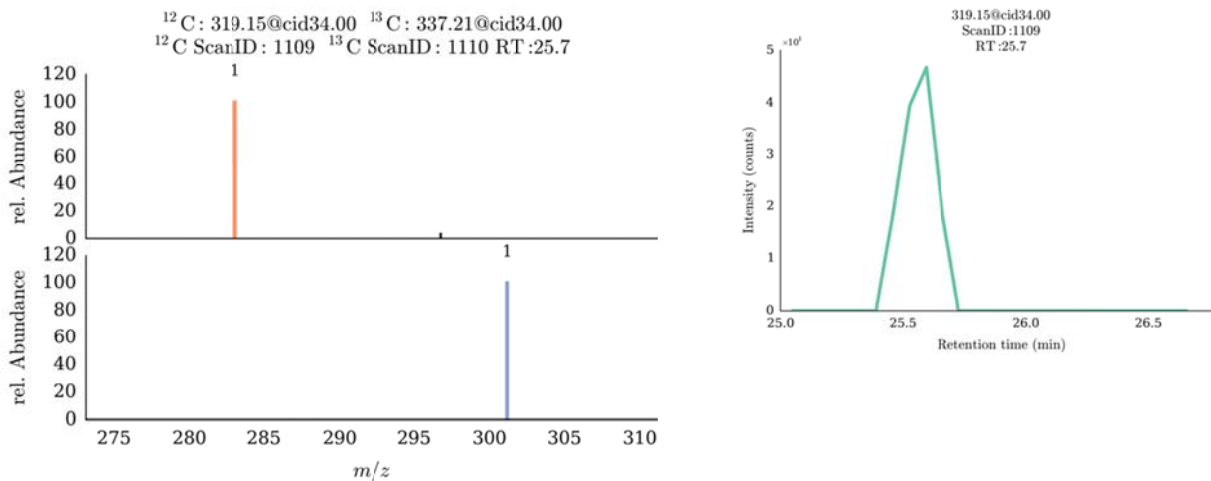

| No. | Molecular formula                      | Relative abundance [%] | $^{12}\text{C}$ $m/z$ | $^{13}\text{C}$ $m/z$ | ppm | n(C) |
|-----|----------------------------------------|------------------------|-----------------------|-----------------------|-----|------|
| 1   | $\text{C}_{18}\text{H}_{19}\text{O}_3$ | 100.00                 | 283.1327              | 301.1919              | 0.5 | 18   |

### FB3

**Figure S-30.** Product ion spectra, fragment ion EICs and list of all FragExtract derived fragment ions for FB3 at a concentration level of  $c = 1.0$  mg/L

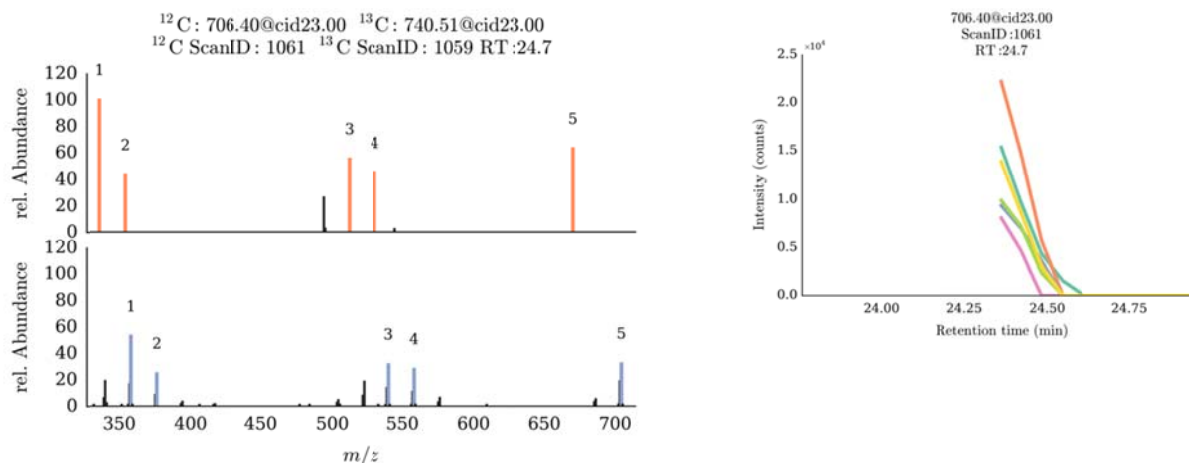

| No. | Molecular formula                                 | Relative abundance [%] | $^{12}\text{C}$ $m/z$ | $^{13}\text{C}$ $m/z$ | ppm | n(C) |
|-----|---------------------------------------------------|------------------------|-----------------------|-----------------------|-----|------|
| 1   | $\text{C}_{22}\text{H}_{42}\text{ON}$             | 100.00                 | 336.3259              | 358.3999              | 0.6 | 22   |
| 2   | $\text{C}_{22}\text{H}_{44}\text{O}_2\text{N}$    | 42.98                  | 354.3378              | 376.4104              | 3.2 | 22   |
| 3   | $\text{C}_{28}\text{H}_{50}\text{O}_7\text{N}$    | 55.11                  | 512.3582              | 540.4523              | 0.1 | 28   |
| 4   | $\text{C}_{28}\text{H}_{52}\text{O}_8\text{N}$    | 44.53                  | 530.3705              | 558.4633              | 3.3 | 28   |
| 5   | $\text{C}_{34}\text{H}_{56}\text{O}_{12}\text{N}$ | 63.04                  | 670.3845              | 704.4944              | 7.2 | 34   |

**Figure S-31.** Product ion spectra, fragment ion EICs and list of all FragExtract derived fragment ions for FB3 at a concentration level of  $c = 0.7$  mg/L

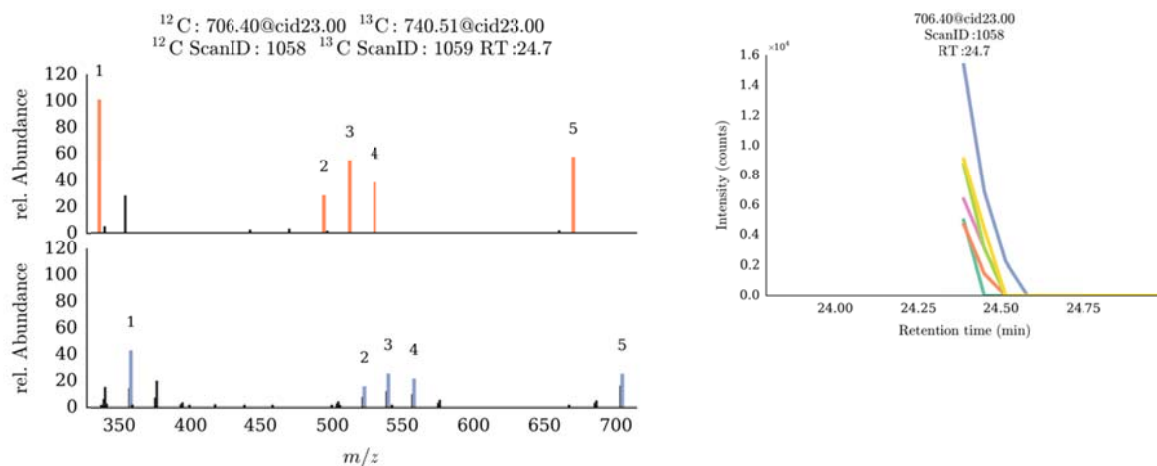

| No. | Molecular formula                                 | Relative abundance [%] | $^{12}\text{C}$ $m/z$ | $^{13}\text{C}$ $m/z$ | ppm | n(C) |
|-----|---------------------------------------------------|------------------------|-----------------------|-----------------------|-----|------|
| 1   | $\text{C}_{22}\text{H}_{42}\text{ON}$             | 100.00                 | 336.3278              | 358.4001              | 5.1 | 22   |
| 2   | $\text{C}_{28}\text{H}_{48}\text{O}_6\text{N}$    | 27.45                  | 494.3472              | 522.4424              | 0.8 | 28   |
| 3   | $\text{C}_{28}\text{H}_{50}\text{O}_7\text{N}$    | 53.70                  | 512.3576              | 540.4526              | 1.1 | 28   |
| 4   | $\text{C}_{28}\text{H}_{52}\text{O}_8\text{N}$    | 37.34                  | 530.3693              | 558.4636              | 1.1 | 28   |
| 5   | $\text{C}_{34}\text{H}_{56}\text{O}_{12}\text{N}$ | 56.28                  | 670.3816              | 704.4946              | 2.8 | 34   |

**Figure S-32.** Product ion spectra, fragment ion EICs and list of all FragExtract derived fragment ions for FB3 at a concentration level of  $c = 0.4 \text{ mg/L}$

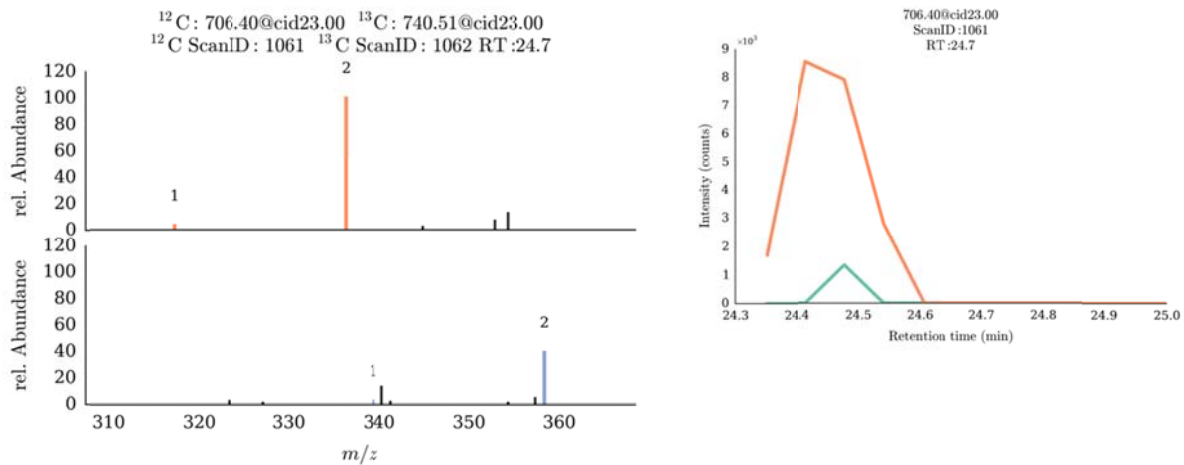

| No. | Molecular formula                     | Relative abundance [%] | $^{12}\text{C}$ $m/z$ | $^{13}\text{C}$ $m/z$ | ppm | n(C) |
|-----|---------------------------------------|------------------------|-----------------------|-----------------------|-----|------|
| 1   | $\text{C}_{22}\text{H}_{39}\text{N}$  | 3.03                   | 317.3095              | 339.3860              | 5.7 | 22   |
| 2   | $\text{C}_{22}\text{H}_{42}\text{ON}$ | 100.00                 | 336.3251              | 358.4002              | 3.0 | 22   |

## GRIS

**Figure S-33.** Product ion spectra, fragment ion EICs and list of all FragExtract derived fragment ions for GRIS at a concentration level of  $c = 1.0$  mg/L

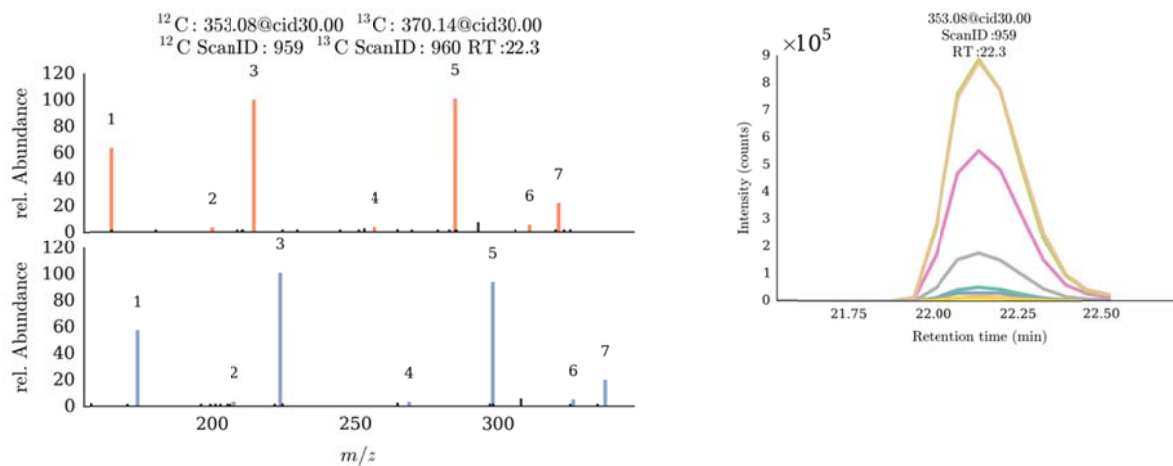

| No. | Molecular formula                                 | Relative abundance [%] | <sup>12</sup> C $m/z$ | <sup>13</sup> C $m/z$ | ppm | n(C) |
|-----|---------------------------------------------------|------------------------|-----------------------|-----------------------|-----|------|
| 1   | C <sub>9</sub> H <sub>9</sub> O <sub>3</sub>      | 62.71                  | 165.0544              | 174.0844              | 1.5 | 9    |
| 2   | C <sub>8</sub> H <sub>5</sub> O <sub>4</sub> Cl   | 2.22                   | 199.9870              | 208.0145              | 0.4 | 8    |
| 3   | C <sub>9</sub> H <sub>8</sub> O <sub>4</sub> Cl   | 99.13                  | 215.0106              | 224.0405              | 0.1 | 9    |
| 4   | C <sub>12</sub> H <sub>14</sub> O <sub>4</sub> Cl | 2.64                   | 257.0576              | 269.0972              | 0.5 | 12   |
| 5   | C <sub>13</sub> H <sub>14</sub> O <sub>5</sub> Cl | 100.00                 | 285.0526              | 298.0959              | 0.5 | 13   |
| 6   | C <sub>15</sub> H <sub>16</sub> O <sub>5</sub> Cl | 4.27                   | 311.0685              | 326.1187              | 1.3 | 15   |
| 7   | C <sub>16</sub> H <sub>14</sub> O <sub>5</sub> Cl | 20.67                  | 321.0525              | 337.1059              | 0.3 | 16   |

**Figure S-34.** Product ion spectra, fragment ion EICs and list of all FragExtract derived fragment ions for GRIS at a concentration level of  $c = 0.7$  mg/L

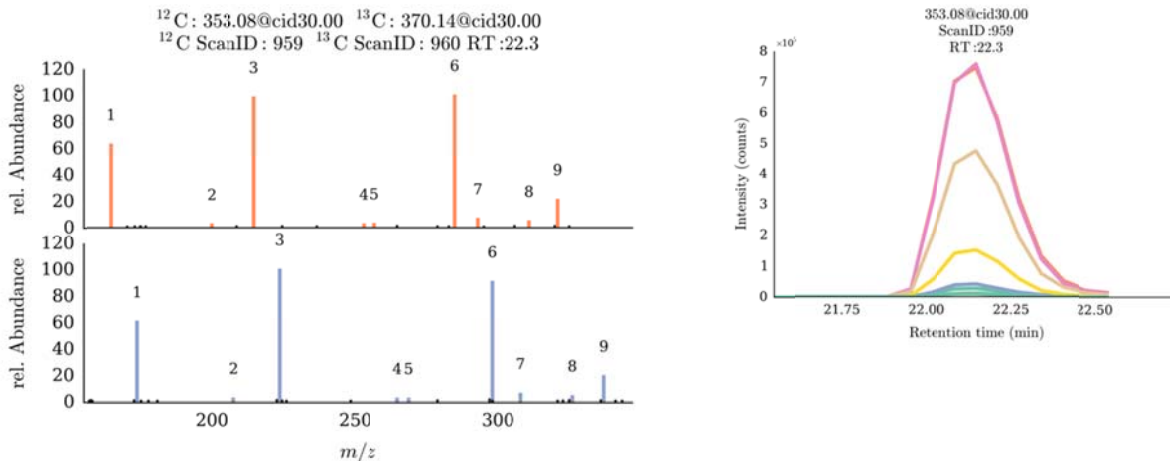

| No. | Molecular formula                               | Relative abundance [%] | $^{12}\text{C}$ $m/z$ | $^{13}\text{C}$ $m/z$ | ppm | n(C) |
|-----|-------------------------------------------------|------------------------|-----------------------|-----------------------|-----|------|
| 1   | $\text{C}_9\text{H}_9\text{O}_3$                | 62.89                  | 165.0544              | 174.0847              | 1.4 | 9    |
| 2   | $\text{C}_8\text{H}_5\text{O}_4\text{Cl}$       | 2.06                   | 199.9867              | 208.0137              | 1.8 | 8    |
| 3   | $\text{C}_9\text{H}_8\text{O}_4\text{Cl}$       | 98.46                  | 215.0106              | 224.0408              | 0.1 | 9    |
| 4   | $\text{C}_{12}\text{H}_{10}\text{O}_4\text{Cl}$ | 2.15                   | 253.0259              | 265.0667              | 1.2 | 12   |
| 5   | $\text{C}_{12}\text{H}_{14}\text{O}_4\text{Cl}$ | 2.45                   | 257.0568              | 269.0975              | 2.8 | 12   |
| 6   | $\text{C}_{13}\text{H}_{14}\text{O}_5\text{Cl}$ | 100.00                 | 285.0526              | 298.0963              | 0.5 | 13   |
| 7   | $\text{C}_{15}\text{H}_{14}\text{O}_4\text{Cl}$ | 6.27                   | 293.0575              | 308.1083              | 0.2 | 15   |
| 8   | $\text{C}_{15}\text{H}_{16}\text{O}_5\text{Cl}$ | 4.42                   | 311.0684              | 326.1182              | 1.1 | 15   |
| 9   | $\text{C}_{16}\text{H}_{14}\text{O}_5\text{Cl}$ | 20.75                  | 321.0524              | 337.1061              | 0.0 | 16   |



**Figure S-35.** Product ion spectra, fragment ion EICs and list of all FragExtract derived fragment ions for GRIS at a concentration level of  $c = 0.4$  mg/L

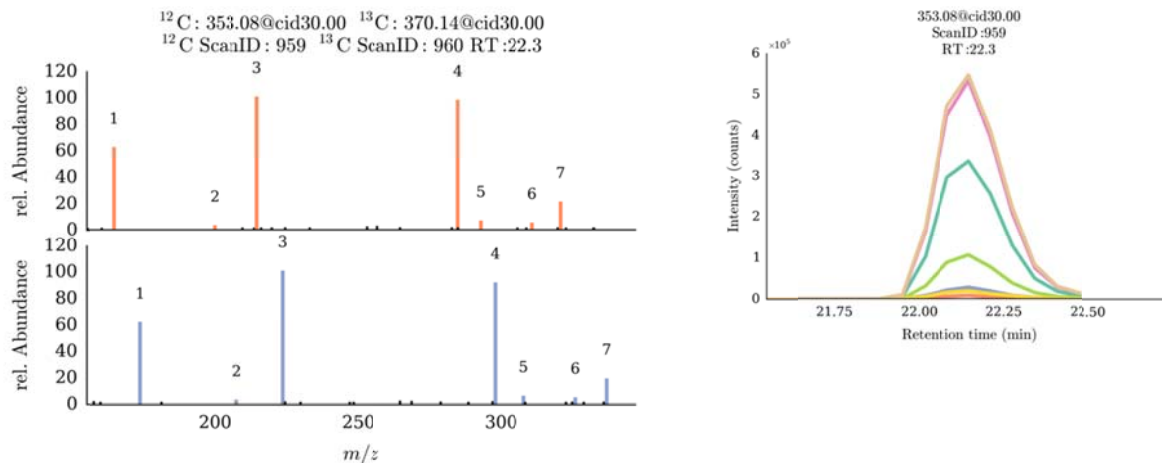

| No. | Molecular formula                                 | Relative abundance [%] | <sup>12</sup> C <i>m/z</i> | <sup>13</sup> C <i>m/z</i> | ppm | n(C) |
|-----|---------------------------------------------------|------------------------|----------------------------|----------------------------|-----|------|
| 1   | C <sub>9</sub> H <sub>9</sub> O <sub>3</sub>      | 61.71                  | 165.0546                   | 174.0850                   | 0.3 | 9    |
| 2   | C <sub>8</sub> H <sub>5</sub> O <sub>4</sub> Cl   | 2.27                   | 199.9870                   | 208.0143                   | 0.5 | 8    |
| 3   | C <sub>9</sub> H <sub>8</sub> O <sub>4</sub> Cl   | 100.00                 | 215.0108                   | 224.0411                   | 1.0 | 9    |
| 4   | C <sub>13</sub> H <sub>14</sub> O <sub>5</sub> Cl | 97.46                  | 285.0528                   | 298.0967                   | 1.4 | 13   |
| 5   | C <sub>15</sub> H <sub>14</sub> O <sub>4</sub> Cl | 5.87                   | 293.0576                   | 308.1082                   | 0.4 | 15   |
| 6   | C <sub>15</sub> H <sub>16</sub> O <sub>5</sub> Cl | 4.27                   | 311.0683                   | 326.1189                   | 0.8 | 15   |
| 7   | C <sub>16</sub> H <sub>14</sub> O <sub>5</sub> Cl | 20.21                  | 321.0526                   | 337.1066                   | 0.7 | 16   |

**Figure S-36.** Product ion spectra, fragment ion EICs and list of all FragExtract derived fragment ions for GRIS at a concentration level of  $c = 0.1$  mg/L

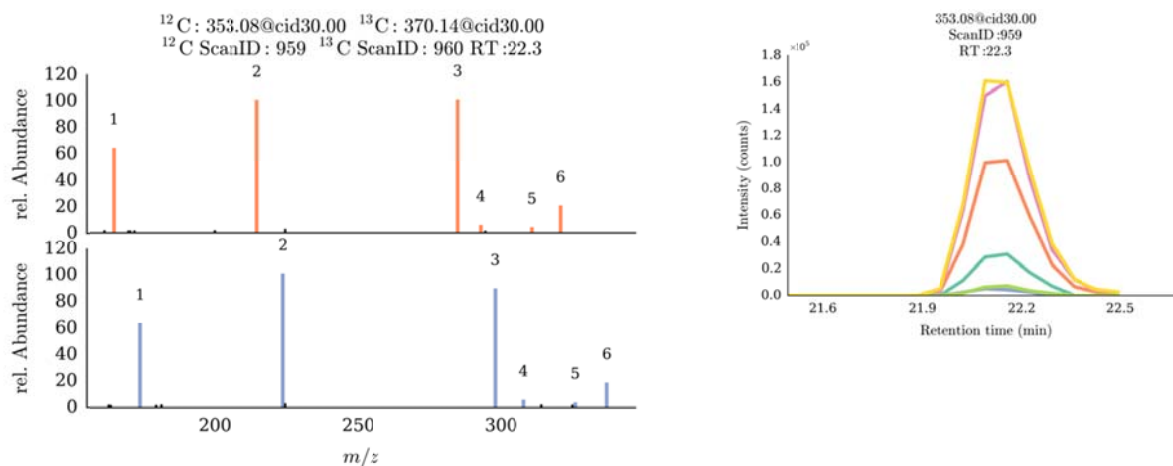

| No. | Molecular formula                               | Relative abundance [%] | $^{12}\text{C}$ $m/z$ | $^{13}\text{C}$ $m/z$ | ppm | n(C) |
|-----|-------------------------------------------------|------------------------|-----------------------|-----------------------|-----|------|
| 1   | $\text{C}_9\text{H}_9\text{O}_3$                | 63.31                  | 165.0546              | 174.0847              | 0.3 | 9    |
| 2   | $\text{C}_9\text{H}_8\text{O}_4\text{Cl}$       | 99.63                  | 215.0107              | 224.0408              | 0.7 | 9    |
| 3   | $\text{C}_{13}\text{H}_{14}\text{O}_5\text{Cl}$ | 100.00                 | 285.0527              | 298.0963              | 1.1 | 13   |
| 4   | $\text{C}_{15}\text{H}_{14}\text{O}_4\text{Cl}$ | 4.85                   | 293.0578              | 308.1084              | 1.1 | 15   |
| 5   | $\text{C}_{15}\text{H}_{16}\text{O}_5\text{Cl}$ | 3.04                   | 311.0688              | 326.1174              | 2.2 | 15   |
| 6   | $\text{C}_{16}\text{H}_{14}\text{O}_5\text{Cl}$ | 19.50                  | 321.0524              | 337.1064              | 0.2 | 16   |

**Figure S-37.** Product ion spectra, fragment ion EICs and list of all FragExtract derived fragment ions for GRIS at a concentration level of  $c = 0.02$  mg/L

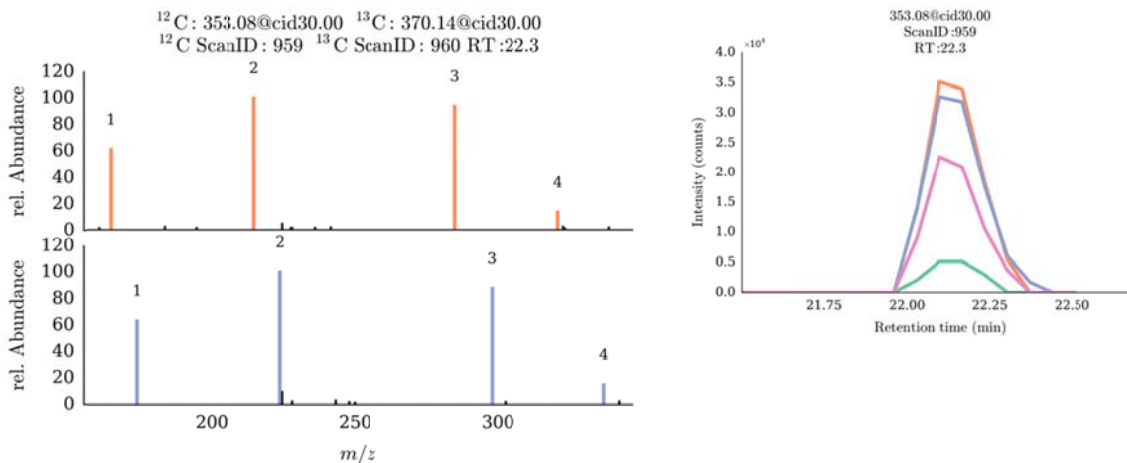

| No. | Molecular formula                               | Relative abundance [%] | $^{12}\text{C}$ $m/z$ | $^{13}\text{C}$ $m/z$ | ppm | n(C) |
|-----|-------------------------------------------------|------------------------|-----------------------|-----------------------|-----|------|
| 1   | $\text{C}_9\text{H}_9\text{O}_3$                | 60.86                  | 165.0545              | 174.0846              | 1.0 | 9    |
| 2   | $\text{C}_9\text{H}_8\text{O}_4\text{Cl}$       | 100.00                 | 215.0107              | 224.0408              | 0.6 | 9    |
| 3   | $\text{C}_{13}\text{H}_{14}\text{O}_5\text{Cl}$ | 93.65                  | 285.0524              | 298.0960              | 0.0 | 13   |
| 4   | $\text{C}_{16}\text{H}_{14}\text{O}_5\text{Cl}$ | 13.31                  | 321.0533              | 337.1042              | 2.8 | 16   |

**Figure S-38.** Product ion spectra, fragment ion EICs and list of all FragExtract derived fragment ions for GRIS at a concentration level of  $c = 0.007$  mg/L

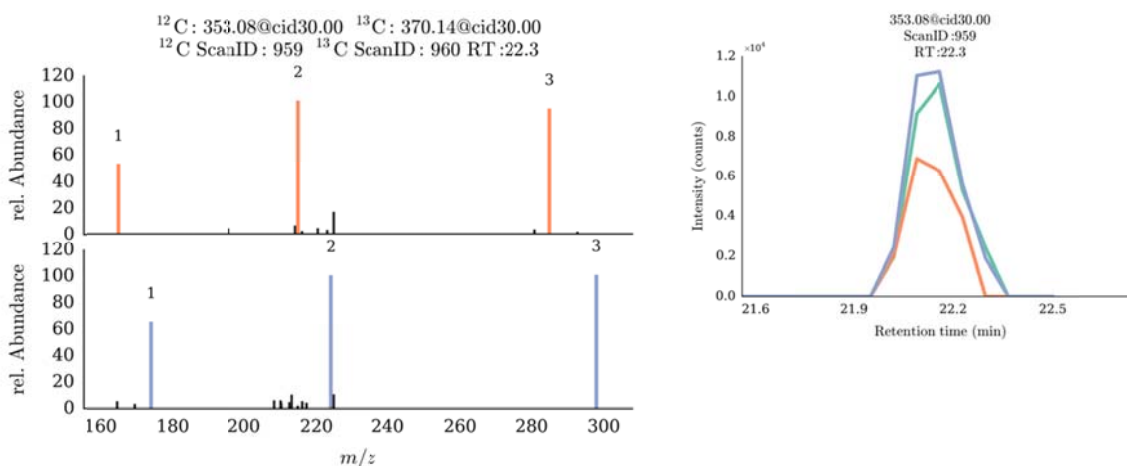

| No. | Molecular formula                               | Relative abundance [%] | $^{12}\text{C}$ $m/z$ | $^{13}\text{C}$ $m/z$ | ppm | n(C) |
|-----|-------------------------------------------------|------------------------|-----------------------|-----------------------|-----|------|
| 1   | $\text{C}_9\text{H}_9\text{O}_3$                | 51.70                  | 165.0547              | 174.0845              | 0.5 | 9    |
| 2   | $\text{C}_9\text{H}_8\text{O}_4\text{Cl}$       | 100.00                 | 215.0102              | 224.0413              | 1.7 | 9    |
| 3   | $\text{C}_{13}\text{H}_{14}\text{O}_5\text{Cl}$ | 94.04                  | 285.0519              | 298.0966              | 1.7 | 13   |

**Figure S-39.** Product ion spectra, fragment ion EICs and list of all FragExtract derived fragment ions for GRIS at a concentration level of  $c = 0.001$  mg/L

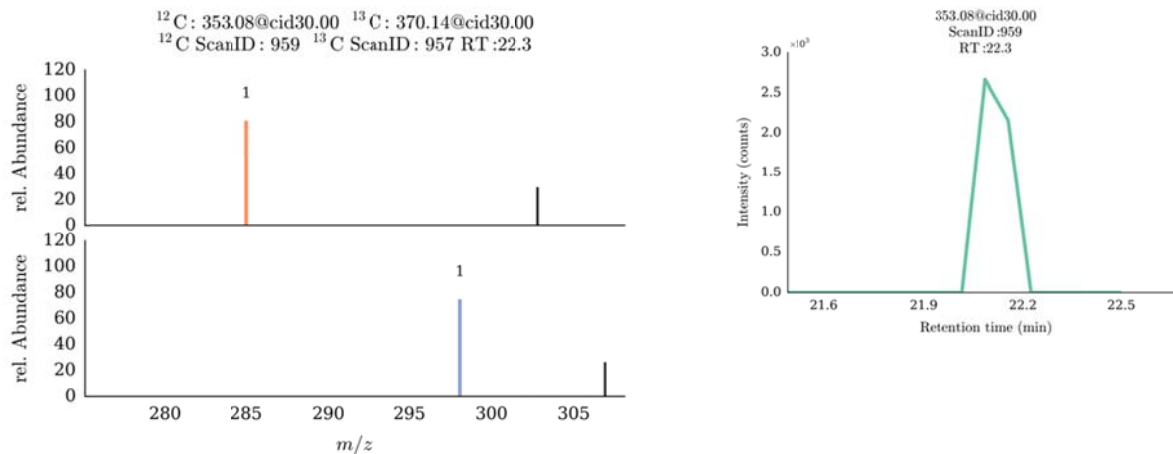

| No. | Molecular formula                                 | Relative abundance [%] | <sup>12</sup> C $m/z$ | <sup>13</sup> C $m/z$ | ppm | n(C) |
|-----|---------------------------------------------------|------------------------|-----------------------|-----------------------|-----|------|
| 1   | C <sub>13</sub> H <sub>14</sub> O <sub>5</sub> Cl | 80.03                  | 285.0532              | 298.0967              | 9.2 | 13   |

## STER

**Figure S-40.** Product ion spectra, fragment ion EICs and list of all FragExtract derived fragment ions for STER at a concentration level of  $c = 1.0$  mg/L

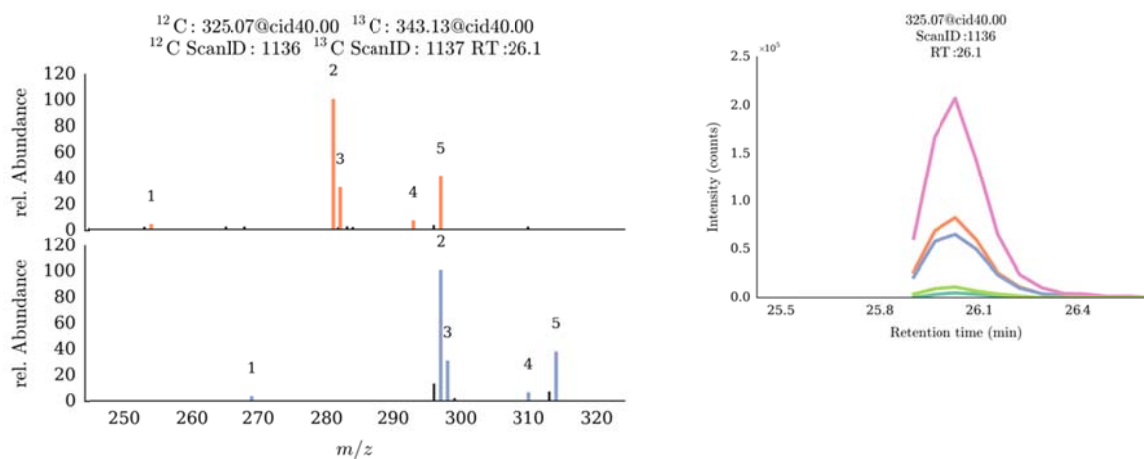

| No. | Molecular formula                              | Relative abundance [%] | <sup>12</sup> C $m/z$ | <sup>13</sup> C $m/z$ | ppm | n(C) |
|-----|------------------------------------------------|------------------------|-----------------------|-----------------------|-----|------|
| 1   | C <sub>15</sub> H <sub>10</sub> O <sub>4</sub> | 2.85                   | 254.0564              | 269.1068              | 4.0 | 15   |
| 2   | C <sub>16</sub> H <sub>9</sub> O <sub>5</sub>  | 100.00                 | 281.0446              | 297.0984              | 0.7 | 16   |
| 3   | C <sub>16</sub> H <sub>10</sub> O <sub>5</sub> | 31.73                  | 282.0522              | 298.1061              | 0.4 | 16   |
| 4   | C <sub>17</sub> H <sub>9</sub> O <sub>5</sub>  | 5.78                   | 293.0443              | 310.1017              | 0.7 | 17   |
| 5   | C <sub>17</sub> H <sub>13</sub> O <sub>5</sub> | 40.13                  | 297.0758              | 314.1331              | 0.3 | 17   |

**Figure S-41.** Product ion spectra, fragment ion EICs and list of all FragExtract derived fragment ions for STER at a concentration level of  $c = 0.7$  mg/L

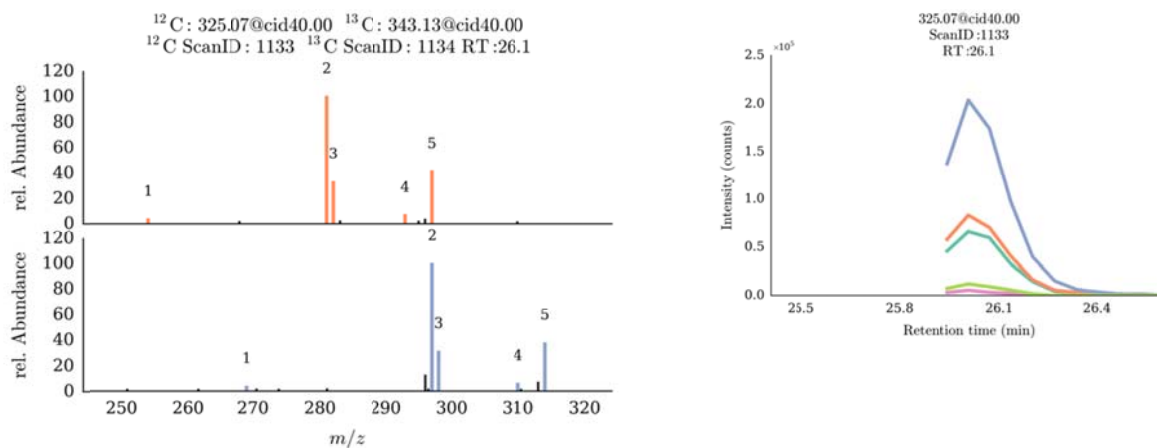

| No. | Molecular formula                      | Relative abundance [%] | $^{12}\text{C}$ $m/z$ | $^{13}\text{C}$ $m/z$ | ppm | $n(\text{C})$ |
|-----|----------------------------------------|------------------------|-----------------------|-----------------------|-----|---------------|
| 1   | $\text{C}_{15}\text{H}_{10}\text{O}_4$ | 3.18                   | 254.0583              | 269.1083              | 3.8 | 15            |
| 2   | $\text{C}_{16}\text{H}_9\text{O}_5$    | 100.00                 | 281.0448              | 297.0983              | 1.1 | 16            |
| 3   | $\text{C}_{16}\text{H}_{10}\text{O}_5$ | 32.74                  | 282.0522              | 298.1058              | 0.3 | 16            |
| 4   | $\text{C}_{17}\text{H}_9\text{O}_5$    | 6.38                   | 293.0447              | 310.1012              | 0.8 | 17            |
| 5   | $\text{C}_{17}\text{H}_{13}\text{O}_5$ | 41.02                  | 297.0760              | 314.1328              | 1.0 | 17            |

**Figure S-42.** Product ion spectra, fragment ion EICs and list of all FragExtract derived fragment ions for STER at a concentration level of  $c = 0.4 \text{ mg/L}$

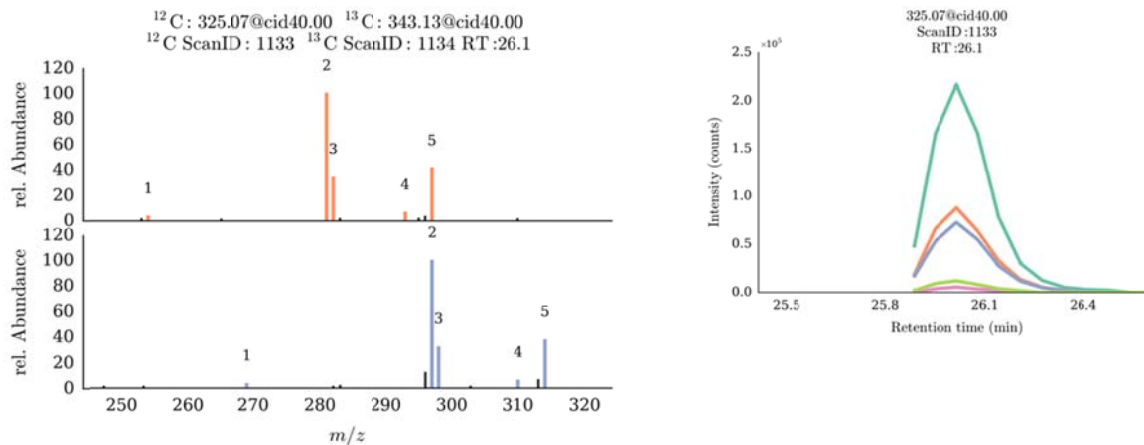

| No. | Molecular formula                      | Relative abundance [%] | $^{12}\text{C}$ $m/z$ | $^{13}\text{C}$ $m/z$ | ppm | n(C) |
|-----|----------------------------------------|------------------------|-----------------------|-----------------------|-----|------|
| 1   | $\text{C}_{15}\text{H}_{10}\text{O}_4$ | 3.08                   | 254.0577              | 269.1071              | 1.4 | 15   |
| 2   | $\text{C}_{16}\text{H}_9\text{O}_5$    | 100.00                 | 281.0447              | 297.0985              | 1.0 | 16   |
| 3   | $\text{C}_{16}\text{H}_{10}\text{O}_5$ | 33.86                  | 282.0523              | 298.1061              | 0.1 | 16   |
| 4   | $\text{C}_{17}\text{H}_9\text{O}_5$    | 6.07                   | 293.0445              | 310.1028              | 0.0 | 17   |
| 5   | $\text{C}_{17}\text{H}_{13}\text{O}_5$ | 40.85                  | 297.0760              | 314.1331              | 0.8 | 17   |

**Figure S-43.** Product ion spectra, fragment ion EICs and list of all FragExtract derived fragment ions for STER at a concentration level of  $c = 0.1 \text{ mg/L}$

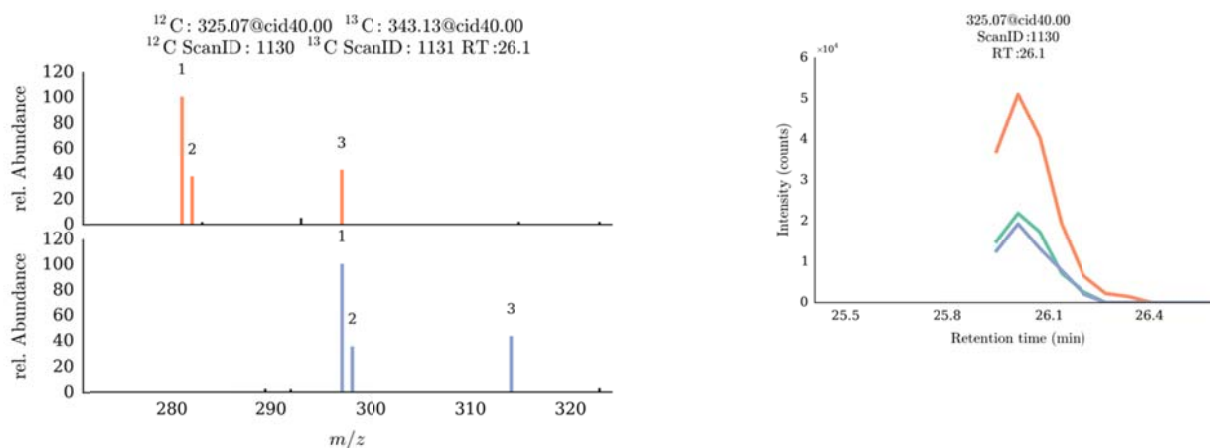

| No. | Molecular formula                      | Relative abundance [%] | $^{12}\text{C}$ $m/z$ | $^{13}\text{C}$ $m/z$ | ppm | n(C) |
|-----|----------------------------------------|------------------------|-----------------------|-----------------------|-----|------|
| 1   | $\text{C}_{16}\text{H}_9\text{O}_5$    | 100.00                 | 281.0445              | 297.0981              | 0.3 | 16   |
| 2   | $\text{C}_{16}\text{H}_{10}\text{O}_5$ | 37.04                  | 282.0520              | 298.1059              | 1.1 | 16   |
| 3   | $\text{C}_{17}\text{H}_{13}\text{O}_5$ | 42.17                  | 297.0755              | 314.1328              | 0.7 | 17   |

**Figure S-44.** Product ion spectra, fragment ion EICs and list of all FragExtract derived fragment ions for STER at a concentration level of  $c = 0.02$  mg/L

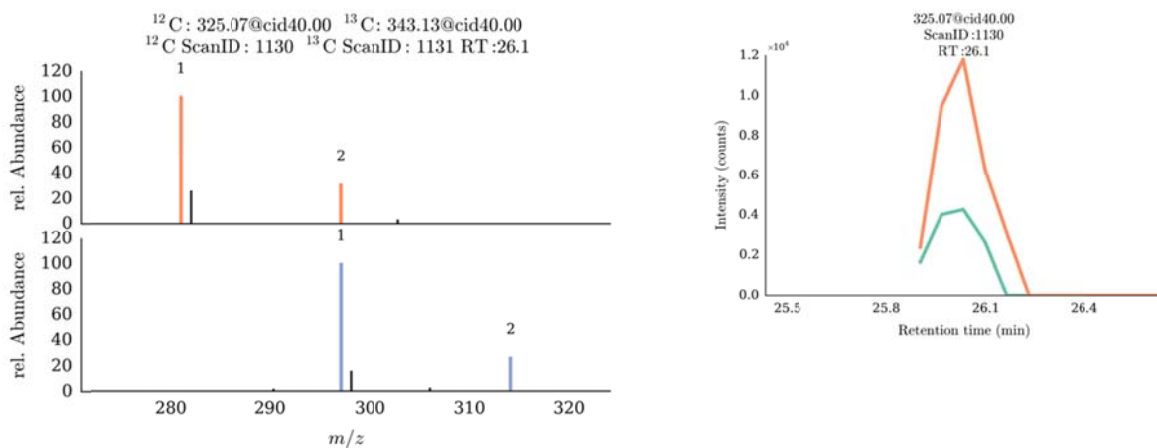

| No. | Molecular formula                      | Relative abundance [%] | $^{12}\text{C}$ $m/z$ | $^{13}\text{C}$ $m/z$ | ppm | n(C) |
|-----|----------------------------------------|------------------------|-----------------------|-----------------------|-----|------|
| 1   | $\text{C}_{16}\text{H}_9\text{O}_5$    | 100.00                 | 281.0442              | 297.0977              | 1.0 | 16   |
| 2   | $\text{C}_{17}\text{H}_{13}\text{O}_5$ | 30.81                  | 297.0747              | 314.1331              | 3.6 | 17   |



## FB1

**Figure S-45.** Product ion spectra, fragment ion EICs and list of all FragExtract derived fragment ions for FB1 at a concentration level of  $c = 1.0$  mg/L

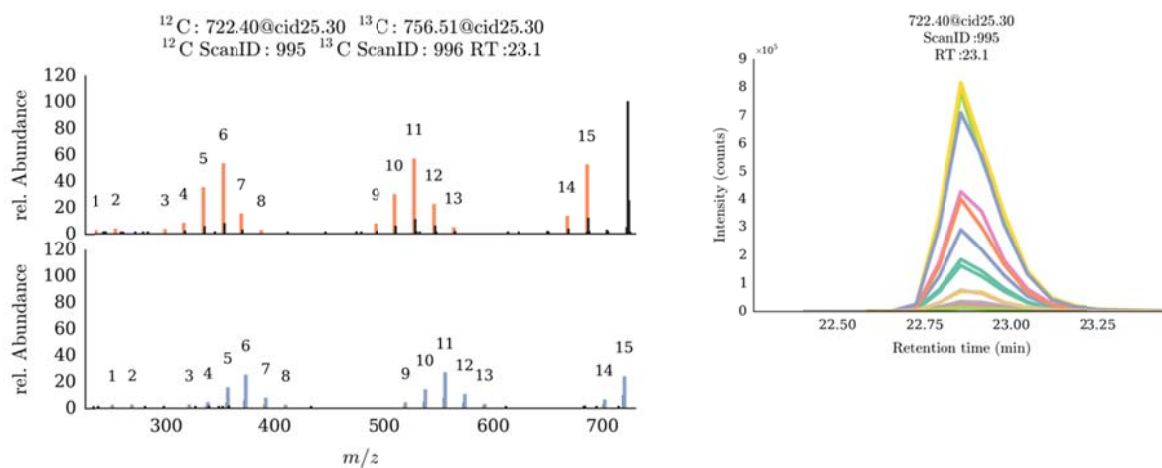

| No. | Molecular formula                                 | Relative abundance [%] | <sup>12</sup> C <i>m/z</i> | <sup>13</sup> C <i>m/z</i> | ppm | n(C) |
|-----|---------------------------------------------------|------------------------|----------------------------|----------------------------|-----|------|
| 1   | C <sub>15</sub> H <sub>26</sub> ON                | 2.42                   | 236.2009                   | 251.2507                   | 0.1 | 15   |
| 2   | C <sub>15</sub> H <sub>28</sub> O <sub>2</sub> N  | 4.16                   | 254.2112                   | 269.2610                   | 0.9 | 15   |
| 3   | C <sub>22</sub> H <sub>35</sub>                   | 3.53                   | 299.2733                   | 321.3478                   | 0.2 | 22   |
| 4   | C <sub>22</sub> H <sub>38</sub> N                 | 12.05                  | 316.2999                   | 338.3737                   | 0.1 | 22   |
| 5   | C <sub>22</sub> H <sub>40</sub> ON                | 60.56                  | 334.3106                   | 356.3846                   | 0.4 | 22   |
| 6   | C <sub>22</sub> H <sub>42</sub> O <sub>2</sub> N  | 93.22                  | 352.3214                   | 374.3953                   | 1.0 | 22   |
| 7   | C <sub>22</sub> H <sub>44</sub> O <sub>3</sub> N  | 24.84                  | 370.3317                   | 392.4058                   | 0.4 | 22   |
| 8   | C <sub>22</sub> H <sub>46</sub> O <sub>4</sub> N  | 2.39                   | 388.3423                   | 410.4200                   | 0.5 | 22   |
| 9   | C <sub>28</sub> H <sub>46</sub> O <sub>6</sub> N  | 11.22                  | 492.3322                   | 520.4266                   | 0.4 | 28   |
| 10  | C <sub>28</sub> H <sub>48</sub> O <sub>7</sub> N  | 51.05                  | 510.3429                   | 538.4374                   | 0.8 | 28   |
| 11  | C <sub>28</sub> H <sub>50</sub> O <sub>8</sub> N  | 100.00                 | 528.3535                   | 556.4478                   | 0.8 | 28   |
| 12  | C <sub>28</sub> H <sub>52</sub> O <sub>9</sub> N  | 37.54                  | 546.3638                   | 574.4581                   | 0.3 | 28   |
| 13  | C <sub>28</sub> H <sub>54</sub> O <sub>10</sub> N | 5.96                   | 564.3754                   | 592.4683                   | 2.0 | 28   |
| 14  | C <sub>34</sub> H <sub>54</sub> O <sub>12</sub> N | 21.60                  | 668.3654                   | 702.4793                   | 2.0 | 34   |
| 15  | C <sub>34</sub> H <sub>56</sub> O <sub>13</sub> N | 91.54                  | 686.3762                   | 720.4902                   | 2.3 | 34   |

**Figure S-46.** Product ion spectra, fragment ion EICs and list of all FragExtract derived fragment ions for FB1 at a concentration level of  $c = 0.7$  mg/L

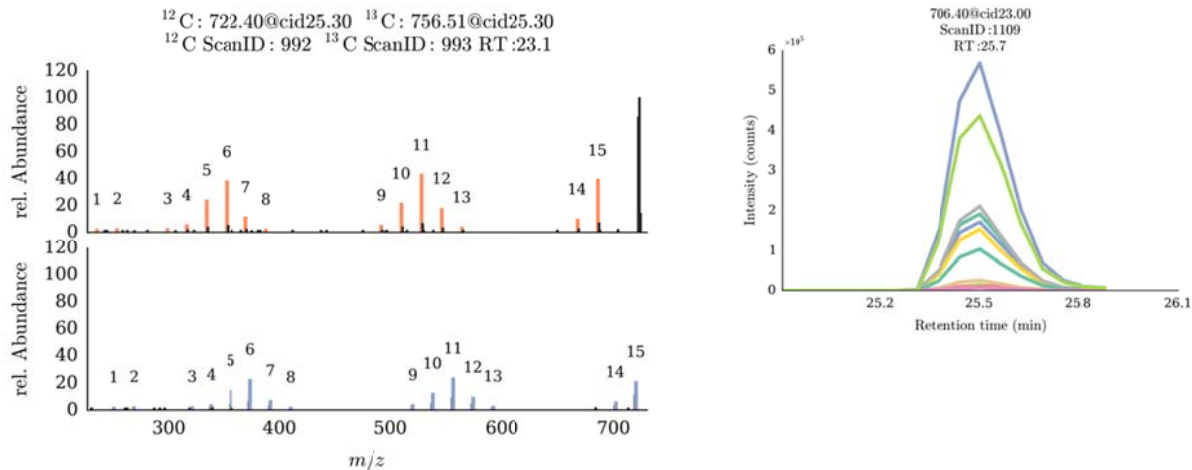

| No. | Molecular formula                                 | Relative abundance [%] | $^{12}\text{C}$ $m/z$ | $^{13}\text{C}$ $m/z$ | ppm | $n(\text{C})$ |
|-----|---------------------------------------------------|------------------------|-----------------------|-----------------------|-----|---------------|
| 1   | $\text{C}_{15}\text{H}_{26}\text{ON}$             | 2.14                   | 236.2007              | 251.2519              | 0.9 | 15            |
| 2   | $\text{C}_{15}\text{H}_{28}\text{O}_2\text{N}$    | 3.36                   | 254.2115              | 269.2615              | 0.0 | 15            |
| 3   | $\text{C}_{22}\text{H}_{35}$                      | 3.24                   | 299.2734              | 321.3474              | 0.2 | 22            |
| 4   | $\text{C}_{22}\text{H}_{38}\text{N}$              | 9.98                   | 316.3001              | 338.3740              | 0.8 | 22            |
| 5   | $\text{C}_{22}\text{H}_{40}\text{ON}$             | 54.14                  | 334.3107              | 356.3849              | 0.9 | 22            |
| 6   | $\text{C}_{22}\text{H}_{42}\text{O}_2\text{N}$    | 87.89                  | 352.3215              | 374.3955              | 1.3 | 22            |
| 7   | $\text{C}_{22}\text{H}_{44}\text{O}_3\text{N}$    | 23.69                  | 370.3318              | 392.4060              | 0.7 | 22            |
| 8   | $\text{C}_{22}\text{H}_{46}\text{O}_4\text{N}$    | 2.15                   | 388.3419              | 410.4159              | 0.5 | 22            |
| 9   | $\text{C}_{28}\text{H}_{46}\text{O}_6\text{N}$    | 9.43                   | 492.3324              | 520.4269              | 0.9 | 28            |
| 10  | $\text{C}_{28}\text{H}_{48}\text{O}_7\text{N}$    | 48.27                  | 510.3431              | 538.4376              | 1.2 | 28            |
| 11  | $\text{C}_{28}\text{H}_{50}\text{O}_8\text{N}$    | 100.00                 | 528.3538              | 556.4480              | 1.3 | 28            |
| 12  | $\text{C}_{28}\text{H}_{52}\text{O}_9\text{N}$    | 39.22                  | 546.3643              | 574.4585              | 1.1 | 28            |
| 13  | $\text{C}_{28}\text{H}_{54}\text{O}_{10}\text{N}$ | 5.98                   | 564.3750              | 592.4686              | 1.4 | 28            |
| 14  | $\text{C}_{34}\text{H}_{54}\text{O}_{12}\text{N}$ | 20.13                  | 668.3653              | 702.4792              | 1.9 | 34            |
| 15  | $\text{C}_{34}\text{H}_{56}\text{O}_{13}\text{N}$ | 90.94                  | 686.3765              | 720.4905              | 2.8 | 34            |

**Figure S-47.** Product ion spectra, fragment ion EICs and list of all FragExtract derived fragment ions for FB1 at a concentration level of  $c = 0.4 \text{ mg/L}$

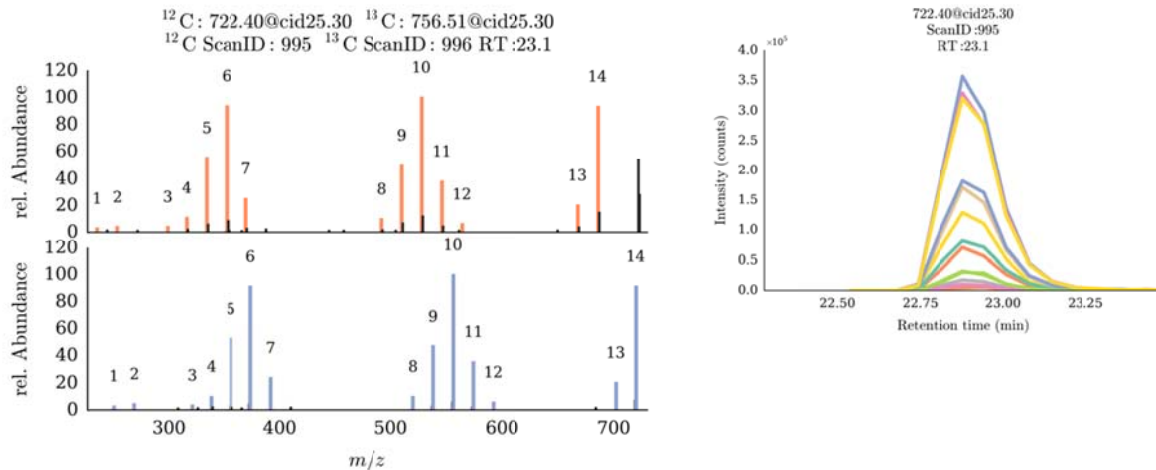

| No. | Molecular formula                                 | Relative abundance [%] | <sup>12</sup> C $m/z$ | <sup>13</sup> C $m/z$ | ppm | n(C) |
|-----|---------------------------------------------------|------------------------|-----------------------|-----------------------|-----|------|
| 1   | C <sub>15</sub> H <sub>26</sub> ON                | 2.41                   | 236.2016              | 251.2514              | 2.9 | 15   |
| 2   | C <sub>15</sub> H <sub>28</sub> O <sub>2</sub> N  | 3.36                   | 254.2112              | 269.2622              | 0.8 | 15   |
| 3   | C <sub>22</sub> H <sub>35</sub>                   | 3.43                   | 299.2737              | 321.3462              | 1.4 | 22   |
| 4   | C <sub>22</sub> H <sub>38</sub> N                 | 10.31                  | 316.2999              | 338.3737              | 0.1 | 22   |
| 5   | C <sub>22</sub> H <sub>40</sub> ON                | 54.94                  | 334.3107              | 356.3847              | 0.8 | 22   |
| 6   | C <sub>22</sub> H <sub>42</sub> O <sub>2</sub> N  | 93.49                  | 352.3215              | 374.3952              | 1.3 | 22   |
| 7   | C <sub>22</sub> H <sub>44</sub> O <sub>3</sub> N  | 24.52                  | 370.3317              | 392.4052              | 0.4 | 22   |
| 8   | C <sub>28</sub> H <sub>46</sub> O <sub>6</sub> N  | 9.37                   | 492.3320              | 520.4259              | 0.1 | 28   |
| 9   | C <sub>28</sub> H <sub>48</sub> O <sub>7</sub> N  | 49.30                  | 510.3427              | 538.4369              | 0.4 | 28   |
| 10  | C <sub>28</sub> H <sub>50</sub> O <sub>8</sub> N  | 100.00                 | 528.3534              | 556.4471              | 0.6 | 28   |
| 11  | C <sub>28</sub> H <sub>52</sub> O <sub>9</sub> N  | 37.45                  | 546.3640              | 574.4578              | 0.7 | 28   |
| 12  | C <sub>28</sub> H <sub>54</sub> O <sub>10</sub> N | 5.55                   | 564.3744              | 592.4662              | 0.3 | 28   |
| 13  | C <sub>34</sub> H <sub>54</sub> O <sub>12</sub> N | 19.58                  | 668.3643              | 702.4782              | 0.4 | 34   |
| 14  | C <sub>34</sub> H <sub>56</sub> O <sub>13</sub> N | 93.17                  | 686.3759              | 720.4894              | 1.8 | 34   |

**Figure S-48.** Product ion spectra, fragment ion EICs and list of all FragExtract derived fragment ions for FB1 at a concentration level of  $c = 0.1 \text{ mg/L}$

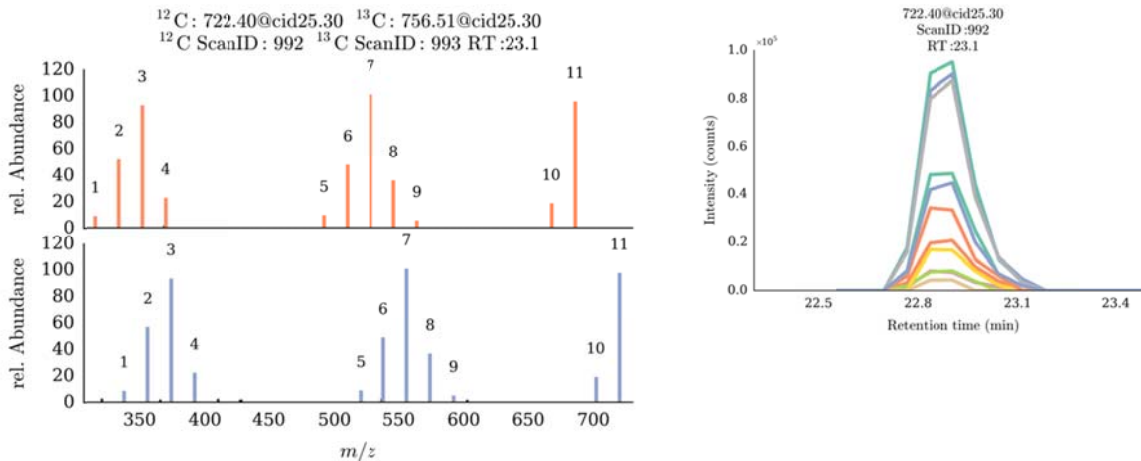

| No. | Molecular formula                                 | Relative abundance [%] | $^{12}\text{C}$ $m/z$ | $^{13}\text{C}$ $m/z$ | ppm | n(C) |
|-----|---------------------------------------------------|------------------------|-----------------------|-----------------------|-----|------|
| 1   | $\text{C}_{22}\text{H}_{38}\text{N}$              | 7.72                   | 316.2995              | 338.3751              | 1.1 | 22   |
| 2   | $\text{C}_{22}\text{H}_{40}\text{ON}$             | 50.89                  | 334.3109              | 356.3846              | 1.5 | 22   |
| 3   | $\text{C}_{22}\text{H}_{42}\text{O}_2\text{N}$    | 91.86                  | 352.3219              | 374.3950              | 2.5 | 22   |
| 4   | $\text{C}_{22}\text{H}_{44}\text{O}_3\text{N}$    | 21.57                  | 370.3324              | 392.4059              | 2.2 | 22   |
| 5   | $\text{C}_{28}\text{H}_{46}\text{O}_6\text{N}$    | 8.31                   | 492.3325              | 520.4254              | 1.1 | 28   |
| 6   | $\text{C}_{28}\text{H}_{48}\text{O}_7\text{N}$    | 46.74                  | 510.3434              | 538.4369              | 1.6 | 28   |
| 7   | $\text{C}_{28}\text{H}_{50}\text{O}_8\text{N}$    | 100.00                 | 528.3534              | 556.4467              | 0.6 | 28   |
| 8   | $\text{C}_{28}\text{H}_{52}\text{O}_9\text{N}$    | 34.78                  | 546.3650              | 574.4587              | 2.4 | 28   |
| 9   | $\text{C}_{28}\text{H}_{54}\text{O}_{10}\text{N}$ | 4.32                   | 564.3765              | 592.4726              | 4.0 | 28   |
| 10  | $\text{C}_{34}\text{H}_{54}\text{O}_{12}\text{N}$ | 17.33                  | 668.3646              | 702.4775              | 0.9 | 34   |
| 11  | $\text{C}_{34}\text{H}_{56}\text{O}_{13}\text{N}$ | 94.70                  | 686.3762              | 720.4894              | 2.3 | 34   |

**Figure S-49.** Product ion spectra, fragment ion EICs and list of all FragExtract derived fragment ions for FB1 at a concentration level of  $c = 0.02$  mg/L

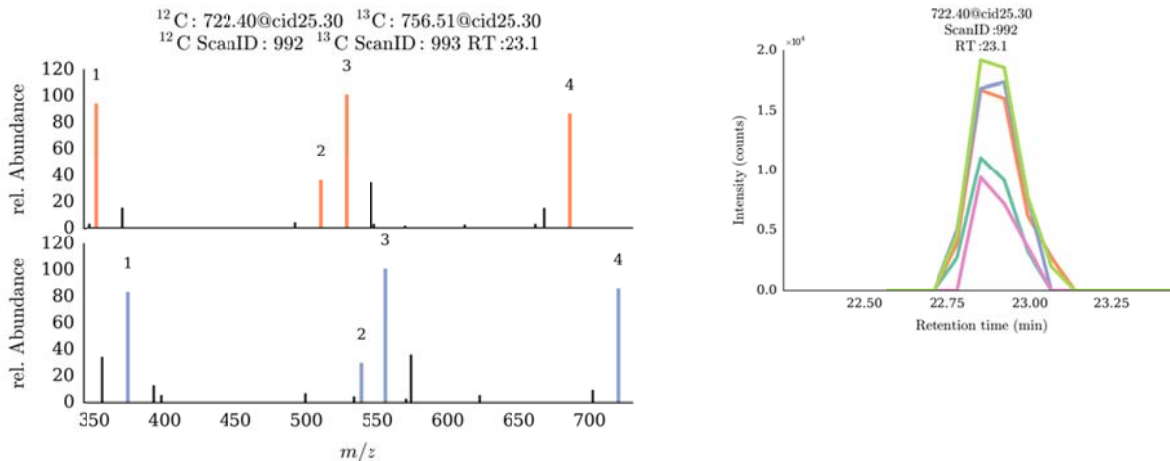

| No. | Molecular formula                                 | Relative abundance [%] | $^{12}\text{C}$ $m/z$ | $^{13}\text{C}$ $m/z$ | ppm | n(C) |
|-----|---------------------------------------------------|------------------------|-----------------------|-----------------------|-----|------|
| 1   | $\text{C}_{22}\text{H}_{42}\text{O}_2\text{N}$    | 93.21                  | 352.3217              | 374.3943              | 2.0 | 22   |
| 2   | $\text{C}_{28}\text{H}_{48}\text{O}_7\text{N}$    | 35.27                  | 510.3388              | 538.4343              | 7.2 | 28   |
| 3   | $\text{C}_{28}\text{H}_{50}\text{O}_8\text{N}$    | 100.00                 | 528.3520              | 556.4437              | 2.1 | 28   |
| 4   | $\text{C}_{34}\text{H}_{56}\text{O}_{13}\text{N}$ | 85.60                  | 686.3760              | 720.4894              | 2.1 | 34   |

**Figure S-50.** Product ion spectra, fragment ion EICs and list of all FragExtract derived fragment ions for FB1 at a concentration level of  $c = 0.007$  mg/L

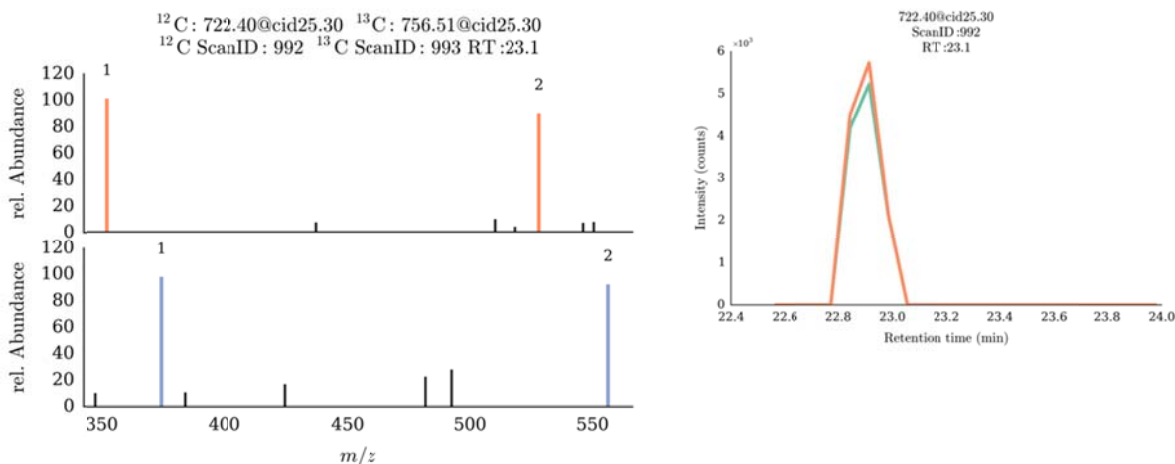

| No. | Molecular formula                              | Relative abundance [%] | $^{12}\text{C}$ $m/z$ | $^{13}\text{C}$ $m/z$ | ppm | n(C) |
|-----|------------------------------------------------|------------------------|-----------------------|-----------------------|-----|------|
| 1   | $\text{C}_{22}\text{H}_{42}\text{O}_2\text{N}$ | 100.00                 | 352.3227              | 374.3944              | 4.9 | 22   |
| 2   | $\text{C}_{28}\text{H}_{50}\text{O}_8\text{N}$ | 88.81                  | 528.3536              | 556.4446              | 1.0 | 28   |

## FB2

**Figure S-51.** Product ion spectra, fragment ion EICs and list of all FragExtract derived fragment ions for FB2 at a concentration level of  $c = 1.0$  mg/L

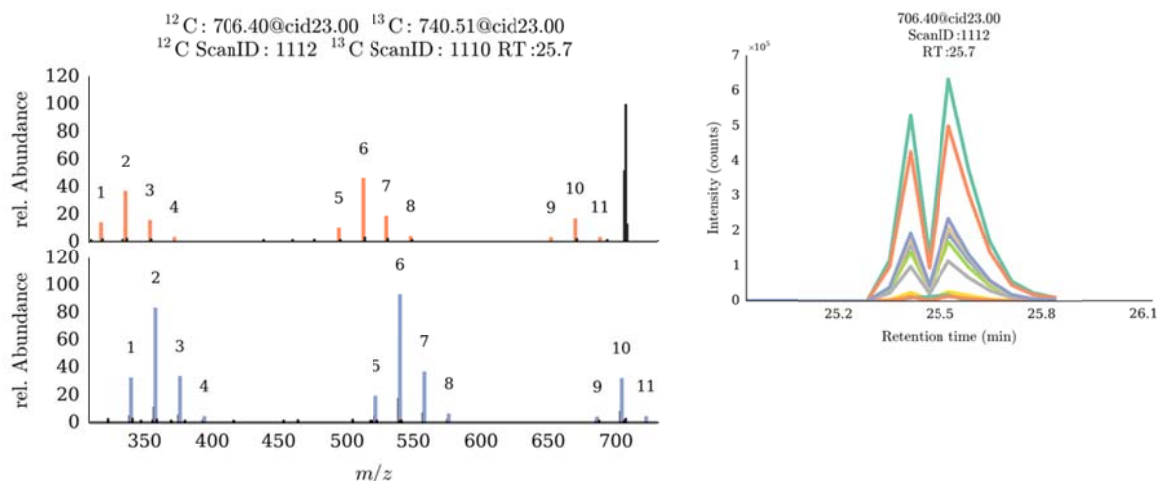

| No. | Molecular formula                                 | Relative abundance [%] | <sup>12</sup> C <i>m/z</i> | <sup>13</sup> C <i>m/z</i> | ppm | n(C) |
|-----|---------------------------------------------------|------------------------|----------------------------|----------------------------|-----|------|
|     |                                                   |                        | 318.3158                   |                            |     |      |
| 1   | C <sub>22</sub> H <sub>40</sub> N                 | 27.40                  |                            | 340.3900                   | 1.0 | 22   |
| 2   | C <sub>22</sub> H <sub>42</sub> ON                | 79.01                  | 336.3267                   | 358.4003                   | 1.8 | 22   |
| 3   | C <sub>22</sub> H <sub>44</sub> O <sub>2</sub> N  | 31.13                  | 354.3372                   | 376.4109                   | 1.4 | 22   |
| 4   | C <sub>22</sub> H <sub>46</sub> O <sub>3</sub> N  | 3.46                   | 372.3475                   | 394.4218                   | 0.8 | 22   |
| 5   | C <sub>28</sub> H <sub>48</sub> O <sub>6</sub> N  | 18.72                  | 494.3483                   | 522.4427                   | 1.4 | 28   |
| 6   | C <sub>28</sub> H <sub>50</sub> O <sub>7</sub> N  | 100.00                 | 512.3594                   | 540.4532                   | 2.5 | 28   |
| 7   | C <sub>28</sub> H <sub>52</sub> O <sub>8</sub> N  | 37.94                  | 530.3699                   | 558.4637                   | 2.1 | 28   |
| 8   | C <sub>28</sub> H <sub>54</sub> O <sub>9</sub> N  | 4.93                   | 548.3791                   | 576.4744                   | 0.4 | 28   |
| 9   | C <sub>34</sub> H <sub>54</sub> O <sub>11</sub> N | 2.90                   | 652.3701                   | 686.4835                   | 1.5 | 34   |
| 10  | C <sub>34</sub> H <sub>56</sub> O <sub>12</sub> N | 33.88                  | 670.3817                   | 704.4951                   | 3.0 | 34   |
| 11  | C <sub>34</sub> H <sub>58</sub> O <sub>13</sub> N | 3.49                   | 688.3928                   | 722.5065                   | 3.6 | 34   |

**Figure S-52.** Product ion spectra, fragment ion EICs and list of all FragExtract derived fragment ions for FB2 at a concentration level of  $c = 0.7$  mg/L

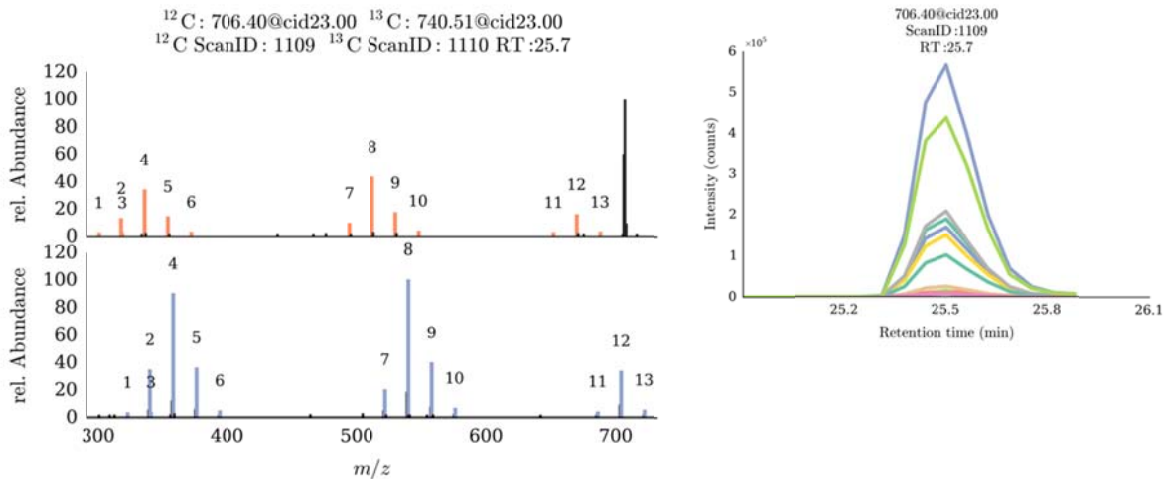

| No. | Molecular formula                                 | Relative abundance [%] | $^{12}\text{C}$ $m/z$ | $^{13}\text{C}$ $m/z$ | ppm | n(C) |
|-----|---------------------------------------------------|------------------------|-----------------------|-----------------------|-----|------|
| 1   | $\text{C}_{22}\text{H}_{37}$                      | 2.04                   | 301.2881              | 323.3633              | 3.1 | 22   |
| 2   | $\text{C}_{22}\text{H}_{40}\text{N}$              | 27.21                  | 318.3155              | 340.3898              | 0.2 | 22   |
| 3   | $\text{C}_{22}\text{H}_{39}\text{O}$              | 2.16                   | 319.3016              | 341.3730              | 6.6 | 22   |
| 4   | $\text{C}_{22}\text{H}_{42}\text{ON}$             | 77.29                  | 336.3263              | 358.4001              | 0.6 | 22   |
| 5   | $\text{C}_{22}\text{H}_{44}\text{O}_2\text{N}$    | 30.43                  | 354.3367              | 376.4107              | 0.1 | 22   |
| 6   | $\text{C}_{22}\text{H}_{46}\text{O}_3\text{N}$    | 3.17                   | 372.3472              | 394.4213              | 0.0 | 22   |
| 7   | $\text{C}_{28}\text{H}_{48}\text{O}_6\text{N}$    | 18.71                  | 494.3478              | 522.4424              | 0.5 | 28   |
| 8   | $\text{C}_{28}\text{H}_{50}\text{O}_7\text{N}$    | 100.00                 | 512.3589              | 540.4529              | 1.4 | 28   |
| 9   | $\text{C}_{28}\text{H}_{52}\text{O}_8\text{N}$    | 37.30                  | 530.3694              | 558.4636              | 1.3 | 28   |
| 10  | $\text{C}_{28}\text{H}_{54}\text{O}_9\text{N}$    | 5.21                   | 548.3796              | 576.4747              | 0.5 | 28   |
| 11  | $\text{C}_{34}\text{H}_{54}\text{O}_{11}\text{N}$ | 2.49                   | 652.3708              | 686.4841              | 2.5 | 34   |
| 12  | $\text{C}_{34}\text{H}_{56}\text{O}_{12}\text{N}$ | 33.97                  | 670.3809              | 704.4947              | 1.8 | 34   |
| 13  | $\text{C}_{34}\text{H}_{58}\text{O}_{13}\text{N}$ | 3.45                   | 688.3921              | 722.5059              | 2.6 | 34   |

**Figure S-53.** Product ion spectra, fragment ion EICs and list of all FragExtract derived fragment ions for FB2 at a concentration level of  $c = 0.4 \text{ mg/L}$

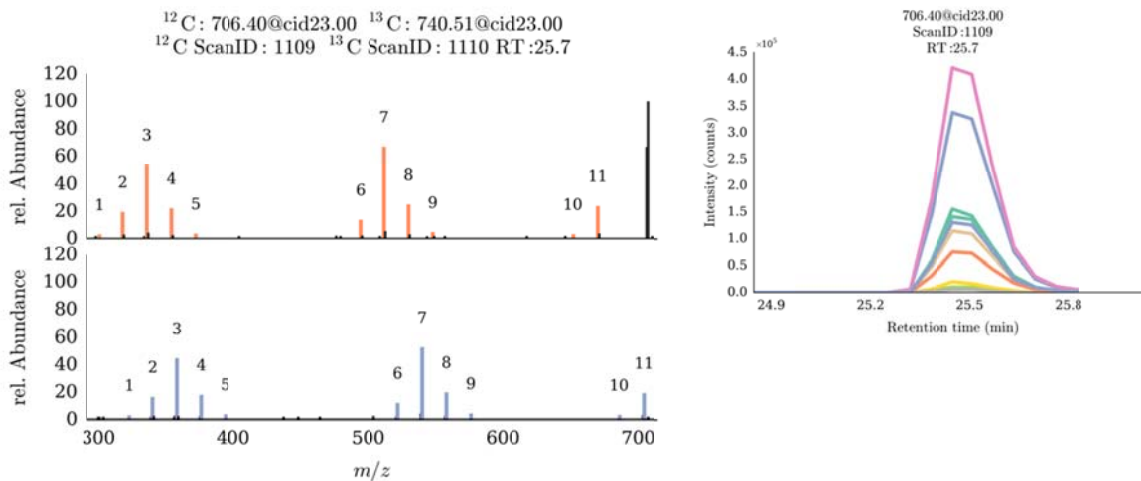

| No. | Molecular formula                                 | Relative abundance [%] | $^{12}\text{C}$ $m/z$ | $^{13}\text{C}$ $m/z$ | ppm | n(C) |
|-----|---------------------------------------------------|------------------------|-----------------------|-----------------------|-----|------|
| 1   | $\text{C}_{22}\text{H}_{37}$                      | 2.07                   | 301.2891              | 323.3621              | 0.3 | 22   |
| 2   | $\text{C}_{22}\text{H}_{40}\text{N}$              | 27.26                  | 318.3159              | 340.3897              | 1.0 | 22   |
| 3   | $\text{C}_{22}\text{H}_{42}\text{ON}$             | 79.98                  | 336.3269              | 358.4001              | 2.3 | 22   |
| 4   | $\text{C}_{22}\text{H}_{44}\text{O}_2\text{N}$    | 31.26                  | 354.3373              | 376.4106              | 1.8 | 22   |
| 5   | $\text{C}_{22}\text{H}_{46}\text{O}_3\text{N}$    | 3.06                   | 372.3481              | 394.4213              | 2.5 | 22   |
| 6   | $\text{C}_{28}\text{H}_{48}\text{O}_6\text{N}$    | 18.48                  | 494.3484              | 522.4421              | 1.6 | 28   |
| 7   | $\text{C}_{28}\text{H}_{50}\text{O}_7\text{N}$    | 100.00                 | 512.3594              | 540.4527              | 2.3 | 28   |
| 8   | $\text{C}_{28}\text{H}_{52}\text{O}_8\text{N}$    | 35.43                  | 530.3698              | 558.4636              | 2.0 | 28   |
| 9   | $\text{C}_{28}\text{H}_{54}\text{O}_9\text{N}$    | 4.68                   | 548.3798              | 576.4735              | 0.9 | 28   |
| 10  | $\text{C}_{34}\text{H}_{54}\text{O}_{11}\text{N}$ | 2.52                   | 652.3707              | 686.4854              | 2.4 | 34   |
| 11  | $\text{C}_{34}\text{H}_{56}\text{O}_{12}\text{N}$ | 33.77                  | 670.3813              | 704.4948              | 2.4 | 34   |



**Figure S-54.** Product ion spectra, fragment ion EICs and list of all FragExtract derived fragment ions for FB2 at a concentration level of  $c = 0.1 \text{ mg/L}$

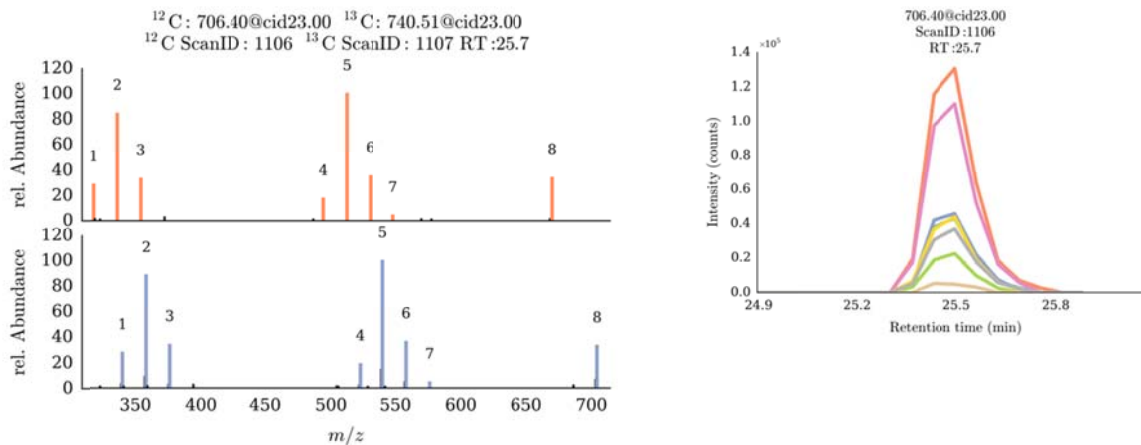

| No. | Molecular formula                                 | Relative abundance [%] | $^{12}\text{C}$ $m/z$ | $^{13}\text{C}$ $m/z$ | ppm | n(C) |
|-----|---------------------------------------------------|------------------------|-----------------------|-----------------------|-----|------|
| 1   | $\text{C}_{22}\text{H}_{40}\text{N}$              | 28.29                  | 318.3159              | 340.3900              | 1.2 | 22   |
| 2   | $\text{C}_{22}\text{H}_{42}\text{ON}$             | 84.47                  | 336.3268              | 358.4003              | 2.2 | 22   |
| 3   | $\text{C}_{22}\text{H}_{44}\text{O}_2\text{N}$    | 33.09                  | 354.3373              | 376.4109              | 1.9 | 22   |
| 4   | $\text{C}_{28}\text{H}_{48}\text{O}_6\text{N}$    | 17.28                  | 494.3477              | 522.4423              | 0.3 | 28   |
| 5   | $\text{C}_{28}\text{H}_{50}\text{O}_7\text{N}$    | 100.00                 | 512.3589              | 540.4526              | 1.4 | 28   |
| 6   | $\text{C}_{28}\text{H}_{52}\text{O}_8\text{N}$    | 35.07                  | 530.3696              | 558.4637              | 1.6 | 28   |
| 7   | $\text{C}_{28}\text{H}_{54}\text{O}_9\text{N}$    | 3.80                   | 548.3776              | 576.4756              | 3.1 | 28   |
| 8   | $\text{C}_{34}\text{H}_{56}\text{O}_{12}\text{N}$ | 33.61                  | 670.3804              | 704.4946              | 1.0 | 34   |

**Figure S-55.** Product ion spectra, fragment ion EICs and list of all FragExtract derived fragment ions for FB2 at a concentration level of  $c = 0.02$  mg/L

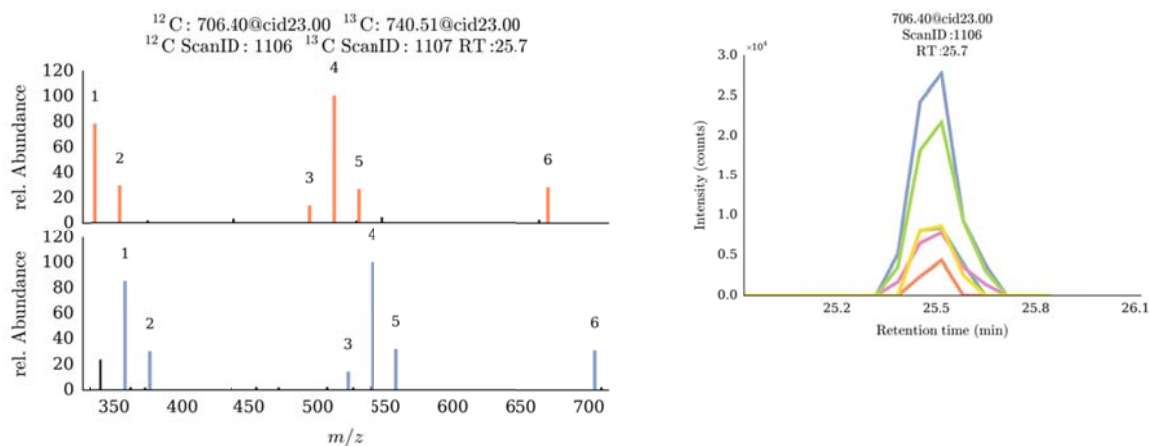

| No. | Molecular formula                                 | Relative abundance [%] | $^{12}\text{C}$ $m/z$ | $^{13}\text{C}$ $m/z$ | ppm | n(C) |
|-----|---------------------------------------------------|------------------------|-----------------------|-----------------------|-----|------|
| 1   | $\text{C}_{22}\text{H}_{42}\text{ON}$             | 77.54                  | 336.3266              | 358.4006              | 1.4 | 22   |
| 2   | $\text{C}_{22}\text{H}_{44}\text{O}_2\text{N}$    | 28.24                  | 354.3366              | 376.4102              | 0.1 | 22   |
| 3   | $\text{C}_{28}\text{H}_{48}\text{O}_6\text{N}$    | 12.57                  | 494.3481              | 522.4402              | 0.9 | 28   |
| 4   | $\text{C}_{28}\text{H}_{50}\text{O}_7\text{N}$    | 100.00                 | 512.3586              | 540.4522              | 0.8 | 28   |
| 5   | $\text{C}_{28}\text{H}_{52}\text{O}_8\text{N}$    | 25.46                  | 530.3685              | 558.4645              | 0.5 | 28   |
| 6   | $\text{C}_{34}\text{H}_{56}\text{O}_{12}\text{N}$ | 27.36                  | 670.3788              | 704.4922              | 1.3 | 34   |

**Figure S-56.** Product ion spectra, fragment ion EICs and list of all FragExtract derived fragment ions for FB2 at a concentration level of  $c = 0.007$  mg/L

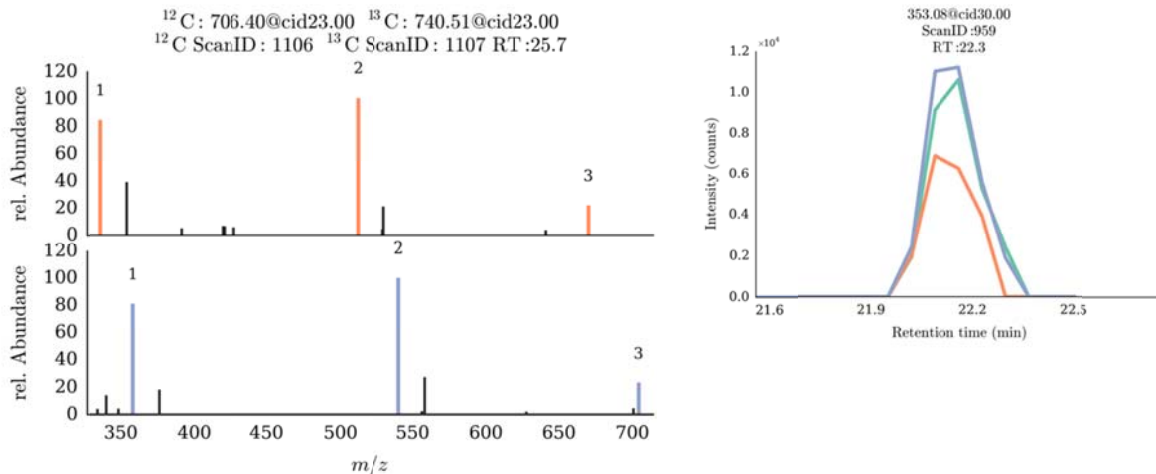

| No. | Molecular formula                                 | Relative abundance [%] | <sup>12</sup> C <i>m/z</i> | <sup>13</sup> C <i>m/z</i> | ppm | n(C) |
|-----|---------------------------------------------------|------------------------|----------------------------|----------------------------|-----|------|
| 1   | C <sub>22</sub> H <sub>42</sub> ON                | 84.16                  | 336.3280                   | 358.3999                   | 5.7 | 22   |
| 2   | C <sub>28</sub> H <sub>50</sub> O <sub>7</sub> N  | 100.00                 | 512.3586                   | 540.4524                   | 0.9 | 28   |
| 3   | C <sub>34</sub> H <sub>56</sub> O <sub>12</sub> N | 20.59                  | 670.3787                   | 704.4961                   | 1.6 | 34   |

**Table S-3.** Overview of all precursor ions of biological compounds which had been chosen from a metabolomics LC-HRMS dataset for LC-HRMS/MS measurements and subsequent data processing by FragExtract used together with the annotated elemental composition

| <sup>12</sup> C <i>m/z</i> | <sup>13</sup> C <i>m/z</i> | n(C) | Ion species         | Rt[min] | Possible molecular formula                                                                                                                                                                                                                                                                                                                                                                                                                                   | Annotated molecular formula                                                                                                                           |
|----------------------------|----------------------------|------|---------------------|---------|--------------------------------------------------------------------------------------------------------------------------------------------------------------------------------------------------------------------------------------------------------------------------------------------------------------------------------------------------------------------------------------------------------------------------------------------------------------|-------------------------------------------------------------------------------------------------------------------------------------------------------|
| 571.0856                   | 601.1863                   | 30   | [M+H] <sup>+</sup>  | 26.15   | C <sub>30</sub> H <sub>19</sub> O <sub>12</sub> ,<br>C <sub>30</sub> H <sub>24</sub> O <sub>5</sub> NP <sub>3</sub>                                                                                                                                                                                                                                                                                                                                          | C <sub>30</sub> H <sub>19</sub> O <sub>12</sub> ,<br>C <sub>30</sub> H <sub>24</sub> O <sub>5</sub> NP <sub>3</sub>                                   |
| 611.2491                   | 637.3363                   | 26   | [M+H] <sup>+</sup>  | 10.45   | C <sub>26</sub> H <sub>46</sub> N <sub>7</sub> P <sub>5</sub> ,<br>C <sub>26</sub> H <sub>41</sub> O <sub>7</sub> N <sub>6</sub> P <sub>2</sub> ,<br>C <sub>26</sub> H <sub>34</sub> O <sub>5</sub> N <sub>11</sub> P                                                                                                                                                                                                                                        | C <sub>26</sub> H <sub>41</sub> O <sub>7</sub> N <sub>6</sub> P <sub>2</sub> ,<br>C <sub>26</sub> H <sub>34</sub> O <sub>5</sub> N <sub>11</sub> P    |
| 647.3724                   | 677.4731                   | 30   | [M+Na] <sup>+</sup> | 23.9    | C <sub>30</sub> H <sub>52</sub> O <sub>8</sub> N <sub>6</sub> Na,<br>C <sub>30</sub> H <sub>57</sub> ON <sub>7</sub> P <sub>3</sub> Na                                                                                                                                                                                                                                                                                                                       | C <sub>30</sub> H <sub>52</sub> O <sub>8</sub> N <sub>6</sub> Na                                                                                      |
| 647.3724                   | 677.4731                   | 30   | [M+Na] <sup>+</sup> | 26.74   | C <sub>30</sub> H <sub>52</sub> O <sub>8</sub> N <sub>6</sub> Na,<br>C <sub>30</sub> H <sub>57</sub> ON <sub>7</sub> P <sub>3</sub> Na                                                                                                                                                                                                                                                                                                                       | C <sub>30</sub> H <sub>52</sub> O <sub>8</sub> N <sub>6</sub> Na                                                                                      |
| 651.5653                   | 690.6961                   | 39   | unknown             | 35.39   | C <sub>39</sub> H <sub>75</sub> O <sub>5</sub> N <sub>2</sub>                                                                                                                                                                                                                                                                                                                                                                                                | C <sub>39</sub> H <sub>75</sub> O <sub>5</sub> N <sub>2</sub>                                                                                         |
| 761.3612                   | 791.4619                   | 30   | [M+H] <sup>+</sup>  | 12.74   | C <sub>30</sub> H <sub>48</sub> O <sub>7</sub> N <sub>15</sub> P,<br>C <sub>30</sub> H <sub>60</sub> O <sub>2</sub> N <sub>11</sub> P <sub>5</sub> ,<br>C <sub>30</sub> H <sub>75</sub> O <sub>4</sub> NP <sub>8</sub> ,<br>C <sub>30</sub> H <sub>70</sub> O <sub>11</sub> P <sub>5</sub> ,<br>C <sub>30</sub> H <sub>55</sub> O <sub>9</sub> N <sub>10</sub> P <sub>2</sub>                                                                                | C <sub>30</sub> H <sub>48</sub> O <sub>7</sub> N <sub>15</sub> P,<br>C <sub>30</sub> H <sub>55</sub> O <sub>9</sub> N <sub>10</sub> P <sub>2</sub>    |
| 787.5031                   | 822.6205                   | 35   | [M+H] <sup>+</sup>  | 22.31   | C <sub>35</sub> H <sub>67</sub> O <sub>10</sub> N <sub>10</sub> ,<br>C <sub>35</sub> H <sub>72</sub> O <sub>3</sub> N <sub>11</sub> P <sub>3</sub> ,<br>C <sub>35</sub> H <sub>82</sub> O <sub>12</sub> P <sub>3</sub>                                                                                                                                                                                                                                       | C <sub>35</sub> H <sub>67</sub> O <sub>10</sub> N <sub>10</sub>                                                                                       |
| 877.375                    | 916.5058                   | 39   | [M+H] <sup>+</sup>  | 17.01   | C <sub>39</sub> H <sub>64</sub> O <sub>4</sub> N <sub>9</sub> P <sub>5</sub> ,<br>C <sub>39</sub> H <sub>59</sub> O <sub>11</sub> N <sub>8</sub> P <sub>2</sub> ,<br>C <sub>39</sub> H <sub>52</sub> O <sub>9</sub> N <sub>13</sub> P,<br>C <sub>39</sub> H <sub>57</sub> O <sub>2</sub> N <sub>14</sub> P <sub>4</sub> ,<br>C <sub>39</sub> H <sub>62</sub> O <sub>18</sub> N <sub>2</sub> P                                                                | C <sub>39</sub> H <sub>59</sub> O <sub>11</sub> N <sub>8</sub> P <sub>2</sub> ,<br>C <sub>39</sub> H <sub>52</sub> O <sub>9</sub> N <sub>13</sub> P   |
| 790.3163                   | 820.4168                   | 30   | [M+H] <sup>+</sup>  | 13.25   | C <sub>30</sub> H <sub>54</sub> O <sub>13</sub> N <sub>8</sub> Fe,<br>C <sub>30</sub> H <sub>59</sub> O <sub>6</sub> N <sub>9</sub> P <sub>3</sub> Fe,<br>C <sub>30</sub> H <sub>44</sub> O <sub>4</sub> N <sub>19</sub> Fe,<br>C <sub>30</sub> H <sub>71</sub> ON <sub>5</sub> P <sub>7</sub> Fe,<br>C <sub>30</sub> H <sub>66</sub> O <sub>8</sub> N <sub>4</sub> P <sub>4</sub> Fe,<br>C <sub>30</sub> H <sub>61</sub> O <sub>15</sub> N <sub>3</sub> PFe | C <sub>30</sub> H <sub>54</sub> O <sub>13</sub> N <sub>8</sub> Fe,<br>C <sub>30</sub> H <sub>66</sub> O <sub>8</sub> N <sub>4</sub> P <sub>4</sub> Fe |

To obtain the possible molecular formulas for the precursor ions a  $\pm 3$  ppm window was allowed. For pairing of the corresponding fragment ions an inter-spectrum mass deviation of  $\pm 10$  ppm and a Relative abundance deviation of 30% was allowed. Rt is the approximate measured retention time as taken from the preceding LC-HRMS full scan measurements. n(C) is the number of carbon atoms that was calculated by FragExtract for the precursor ion and was compared to the detected number of carbon atoms by MetExtract. The ion species was obtained by analyzing the LC-HRMS full scan data with MetExtract<sup>2,3</sup>.

**Figure S-57.** Product ion spectra, fragment ion EICs and list of all FragExtract derived fragment ions for  $m/z$  571.0856 (aurofusarin) at a CE of 35%

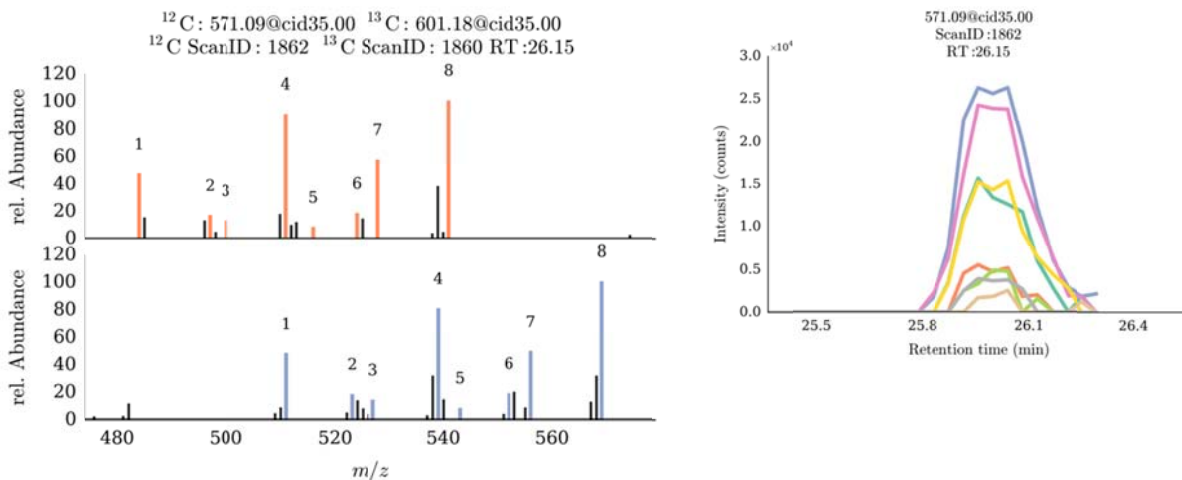

| No. | Molecular formula                                                                             | Relative abundance [%] | $^{12}\text{C}$ $m/z$ | $^{13}\text{C}$ $m/z$ | ppm     | n(C) |
|-----|-----------------------------------------------------------------------------------------------|------------------------|-----------------------|-----------------------|---------|------|
| 1   | $\text{C}_{27}\text{H}_{21}\text{O}_2\text{NP}_3$ , $\text{C}_{27}\text{H}_{16}\text{O}_9$    | 46.49                  | 484.0774              | 511.1716              | 1.1/3.0 | 27   |
| 2   | $\text{C}_{26}\text{H}_7\text{O}_5\text{N}_7$ ,*                                              | 15.83                  | 497.0484              | 523.1320              | 3.9/*   | 26   |
| 3   | $\text{C}_{27}\text{H}_{21}\text{O}_3\text{NP}_3$ , $\text{C}_{27}\text{H}_{16}\text{O}_{10}$ | 11.87                  | 500.0730              | 527.1638              | 0.2/1.7 | 27   |
| 4   | $\text{C}_{28}\text{H}_{15}\text{O}_{10}$ , $\text{C}_{28}\text{H}_{20}\text{O}_3\text{NP}_3$ | 90.11                  | 511.0663              | 539.1609              | 0.5/2.3 | 28   |
| 5   | $\text{C}_{27}\text{H}_{16}\text{O}_{11}$ , $\text{C}_{27}\text{H}_{21}\text{O}_4\text{NP}_3$ | 7.06                   | 516.0702              | 543.1566              | 2.9/4.6 | 27   |
| 6   | $\text{C}_{28}\text{H}_{12}\text{O}_{11}$ , $\text{C}_{28}\text{H}_{17}\text{O}_4\text{NP}_3$ | 17.35                  | 524.0387              | 552.1304              | 2.4/4.2 | 28   |
| 7   | $\text{C}_{28}\text{H}_{21}\text{O}_4\text{NP}_3$ , $\text{C}_{28}\text{H}_{16}\text{O}_{11}$ | 57.09                  | 528.0682              | 556.1622              | 0.7/1.0 | 28   |
| 8   | $\text{C}_{28}\text{H}_{13}\text{O}_{12}$ , $\text{C}_{28}\text{H}_{18}\text{O}_5\text{NP}_3$ | 100.00                 | 541.0403              | 569.1337              | 0.2/1.9 | 28   |

\* no elemental composition could be calculated for the neutral loss mass, molecular formula with the lowest mass deviation is presented

**Figure S-58.** Product ion spectra, fragment ion EICs and list of all FragExtract derived fragment ions for  $m/z$  611.2491 at a CE of 35%

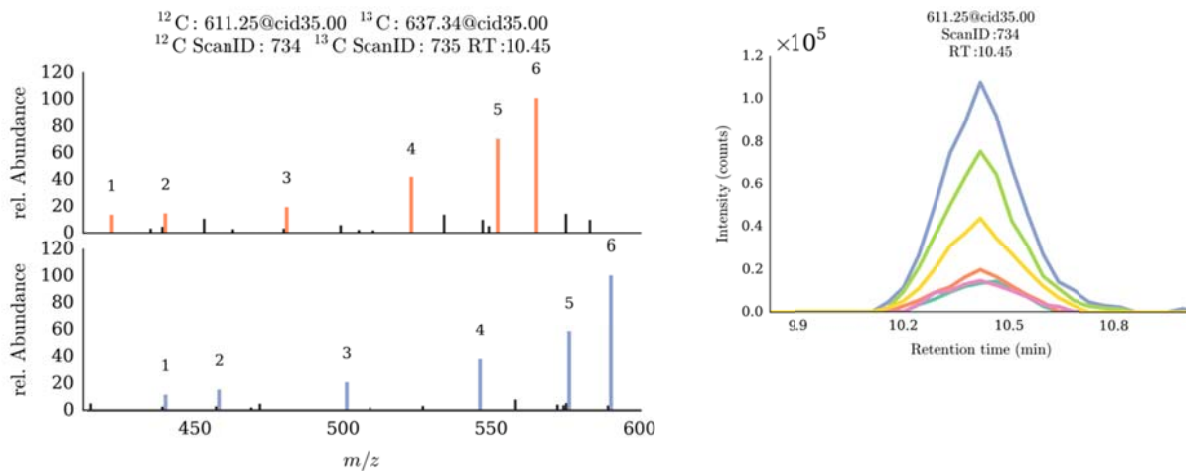

| No. | Molecular formula                                                                                                        | Relative abundance [%] | $^{12}\text{C}$ $m/z$ | $^{13}\text{C}$ $m/z$ | ppm     | n(C) |
|-----|--------------------------------------------------------------------------------------------------------------------------|------------------------|-----------------------|-----------------------|---------|------|
| 1   | $\text{C}_{18}\text{H}_{26}\text{O}_3\text{N}_5\text{P}_2$ , $\text{C}_{18}\text{H}_{19}\text{ON}_{10}\text{P}$          | 12.28                  | 422.1492              | 440.2112              | 3.2/3.9 | 18   |
| 2   | $\text{C}_{18}\text{H}_{28}\text{O}_4\text{N}_5\text{P}_2$ , $\text{C}_{18}\text{H}_{21}\text{O}_2\text{N}_{10}\text{P}$ | 13.33                  | 440.1602              | 458.2239              | 2.0/4.9 | 18   |
| 3   | $\text{C}_{20}\text{H}_{31}\text{O}_4\text{N}_6\text{P}_2$ , $\text{C}_{20}\text{H}_{24}\text{O}_2\text{N}_{11}\text{P}$ | 18.12                  | 481.1871              | 501.2555              | 1.2/5.0 | 20   |
| 4   | $\text{C}_{23}\text{H}_{37}\text{O}_4\text{N}_6\text{P}_2$ , $\text{C}_{23}\text{H}_{30}\text{O}_2\text{N}_{11}\text{P}$ | 40.53                  | 523.2343              | 546.3108              | 0.7/5.1 | 23   |
| 5   | $\text{C}_{24}\text{H}_{36}\text{O}_6\text{N}_5\text{P}_2$ , $\text{C}_{24}\text{H}_{29}\text{O}_4\text{N}_{10}\text{P}$ | 69.80                  | 552.2128              | 576.2931              | 1.3/4.2 | 24   |
| 6   | $\text{C}_{25}\text{H}_{39}\text{O}_5\text{N}_6\text{P}_2$ , $\text{C}_{25}\text{H}_{32}\text{O}_3\text{N}_{11}\text{P}$ | 100.00                 | 565.2445              | 590.3284              | 1.2/4.1 | 25   |

**Figure S-59.** Product ion spectra, fragment ion EICs and list of all FragExtract derived fragment ions for  $m/z$  647.3724 (RT: 23.9) at a CE of 35%

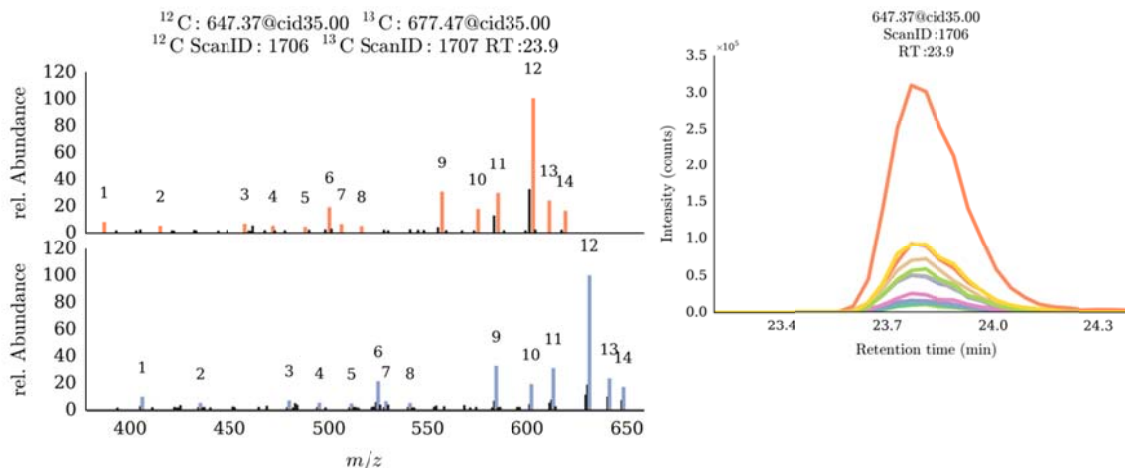

| No. | Molecular formula                                                | Relative abundance [%] | <sup>12</sup> C $m/z$ | <sup>13</sup> C $m/z$ | ppm   | n(C) |
|-----|------------------------------------------------------------------|------------------------|-----------------------|-----------------------|-------|------|
| 1   | C <sub>19</sub> H <sub>32</sub> O <sub>3</sub> N <sub>4</sub> Na | 7.02                   | 387.2374              | 406.3004              | 1.9   | 19   |
| 2   | C <sub>20</sub> H <sub>29</sub> O <sub>3</sub> N <sub>7</sub> ,* | 4.10                   | 415.2335              | 435.2995              | 2.1/* | 20   |
| 3   | C <sub>22</sub> H <sub>37</sub> O <sub>4</sub> N <sub>5</sub> Na | 5.62                   | 458.2743              | 480.3471              | 1.1   | 22   |
| 4   | C <sub>23</sub> H <sub>39</sub> O <sub>4</sub> N <sub>5</sub> Na | 4.26                   | 472.2878              | 495.3670              | 3.4   | 23   |
| 5   | C <sub>23</sub> H <sub>46</sub> O <sub>7</sub> PNa,*             | 3.28                   | 488.2874              | 511.3609              | 0.1/* | 23   |
| 6   | C <sub>25</sub> H <sub>40</sub> O <sub>3</sub> N <sub>8</sub> ,* | 18.08                  | 500.3213              | 525.4047              | 1/*   | 25   |
| 7   | C <sub>23</sub> H <sub>53</sub> ONP <sub>4</sub> Na,*            | 5.44                   | 506.2969              | 529.3708              | 0.2/* | 23   |
| 8   | C <sub>25</sub> H <sub>43</sub> O <sub>5</sub> N <sub>5</sub> Na | 3.87                   | 516.3135              | 541.3983              | 4.1   | 25   |
| 9   | C <sub>27</sub> H <sub>46</sub> O <sub>5</sub> N <sub>6</sub> Na | 29.73                  | 557.3425              | 584.4333              | 0.5   | 27   |
| 10  | C <sub>27</sub> H <sub>48</sub> O <sub>6</sub> N <sub>6</sub> Na | 16.72                  | 575.3534              | 602.4434              | 1.1   | 27   |
| 11  | C <sub>28</sub> H <sub>46</sub> O <sub>6</sub> N <sub>6</sub> Na | 28.66                  | 585.3370              | 613.4308              | 0.1   | 28   |
| 12  | C <sub>28</sub> H <sub>48</sub> O <sub>7</sub> N <sub>6</sub> Na | 100.00                 | 603.3485              | 631.4424              | 1.4   | 28   |
| 13  | C <sub>30</sub> H <sub>48</sub> O <sub>6</sub> N <sub>6</sub> Na | 23.14                  | 611.3530              | 641.4531              | 0.4   | 30   |
| 14  | C <sub>29</sub> H <sub>52</sub> O <sub>7</sub> N <sub>6</sub> Na | 15.52                  | 619.3808              | 648.4758              | 3.0   | 29   |

\* no elemental composition could be calculated for the neutral loss mass, molecular formula with the lowest mass deviation is presented

**Figure S-60.** Product ion spectra, fragment ion EICs and list of all FragExtract derived fragment ions for  $m/z$  647.3724 (RT: 26.74) at a CE of 35%

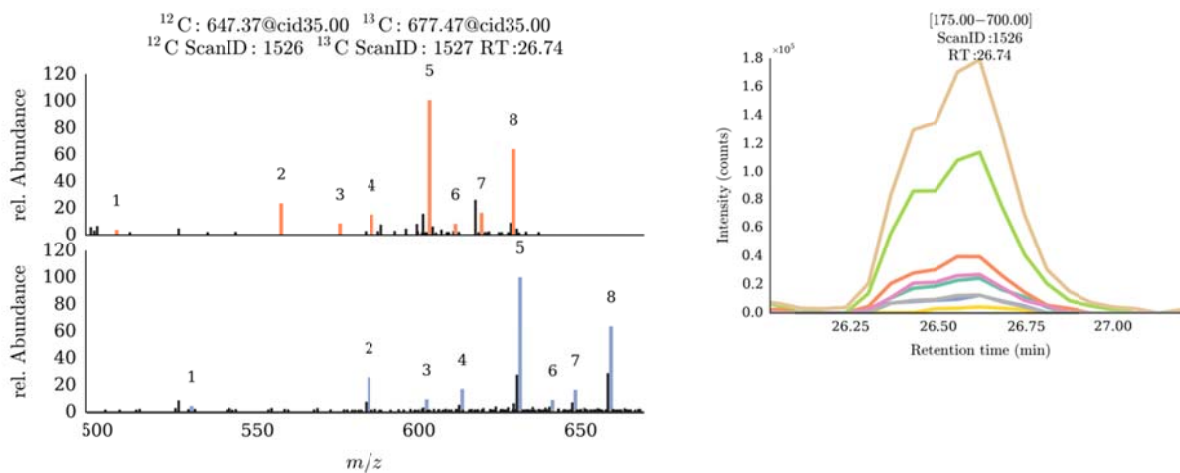

\* no elemental composition could be calculated for the neutral loss mass, molecular formula with the lowest mass deviation is presented



**Figure S-61.** Product ion spectra, fragment ion EICs and list of all FragExtract derived fragment ions for  $m/z$  651.5653 at a CE of 35%

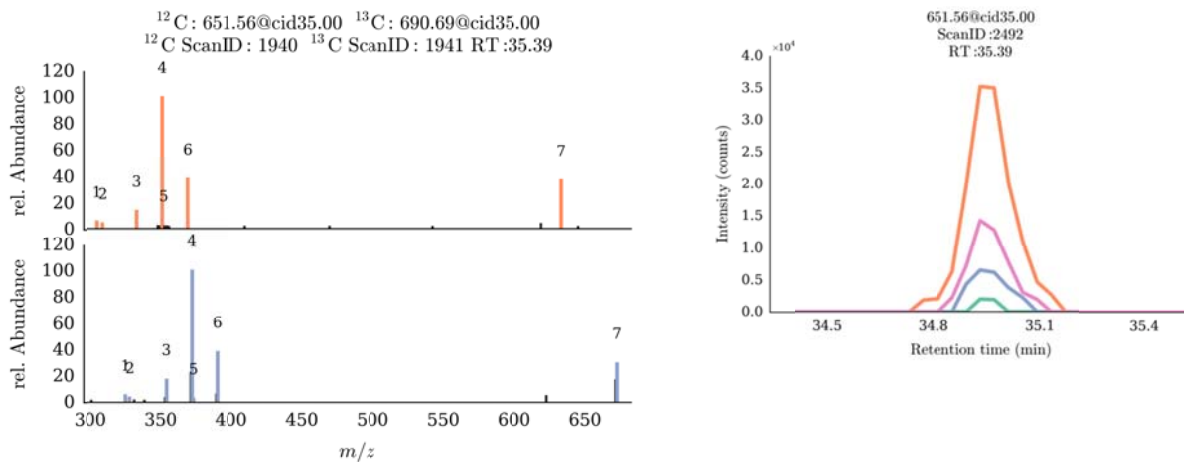

| No. | Molecular formula                                | Relative abundance [%] | $^{12}\text{C}$ $m/z$ | $^{13}\text{C}$ $m/z$ | ppm | n(C) |
|-----|--------------------------------------------------|------------------------|-----------------------|-----------------------|-----|------|
| 1   | $\text{C}_{20}\text{H}_{37}\text{N}_2$           | 5.06                   | 305.2939              | 325.3613              | 4.1 | 20   |
| 2   | $\text{C}_{19}\text{H}_{37}\text{ON}_2$          | 3.60                   | 309.2904              | 328.3551              | 1.2 | 19   |
| 3   | $\text{C}_{21}\text{H}_{37}\text{ON}_2$          | 13.17                  | 333.2897              | 354.3604              | 1.1 | 21   |
| 4   | $\text{C}_{21}\text{H}_{39}\text{O}_2\text{N}_2$ | 100.00                 | 351.3009              | 372.3715              | 0.8 | 21   |
| 5   | $\text{C}_{21}\text{H}_{38}\text{O}_3\text{N}$   | 2.02                   | 352.2849              | 373.3563              | 0.7 | 21   |
| 6   | $\text{C}_{21}\text{H}_{41}\text{O}_3\text{N}_2$ | 37.64                  | 369.3119              | 390.3821              | 1.9 | 21   |
| 7   | $\text{C}_{39}\text{H}_{73}\text{O}_4\text{N}_2$ | 36.65                  | 633.5590              | 672.6896              | 4.0 | 39   |

‘\*’ no elemental composition could be calculated for the neutral loss mass, molecular formula with the lowest mass deviation is presented

**Figure S-62.** Product ion spectra, fragment ion EICs and list of all FragExtract derived fragment ions for  $m/z$  761.3612 at a CE of 35%

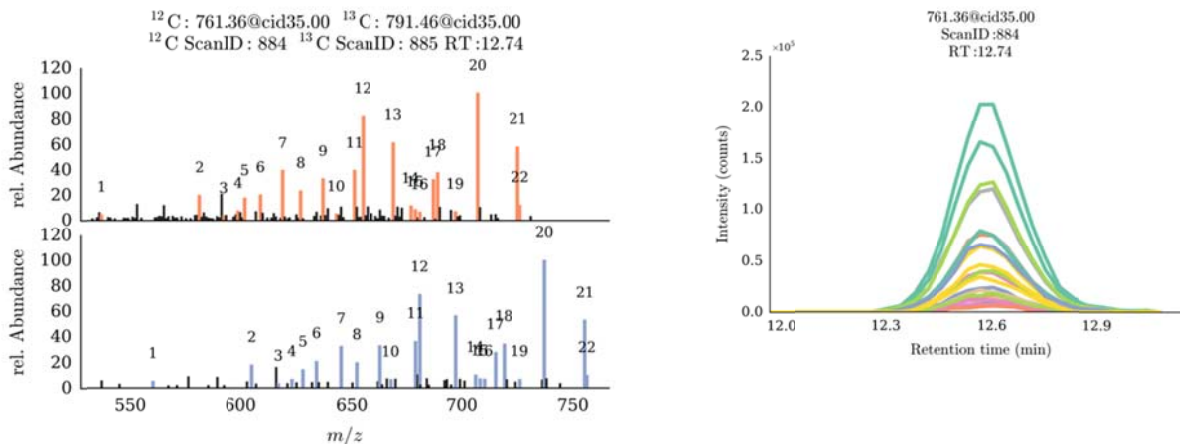

| No. | Molecular formula                                                                                                        | Relative abundance [%] | $^{12}\text{C}$ $m/z$ | $^{13}\text{C}$ $m/z$ | ppm      | n(C) |
|-----|--------------------------------------------------------------------------------------------------------------------------|------------------------|-----------------------|-----------------------|----------|------|
| 1   | $\text{C}_{23}\text{H}_{46}\text{O}_5\text{N}_3\text{P}_3$ , *                                                           | 3.84                   | 537.2636              | 560.3390              | 1.6/*    | 23   |
| 2   | $\text{C}_{24}\text{H}_{39}\text{O}_5\text{N}_8\text{P}_2$ , $\text{C}_{24}\text{H}_{32}\text{O}_3\text{N}_{13}\text{P}$ | 19.23                  | 581.2509              | 605.3289              | 0.7/4.5  | 24   |
| 3   | $\text{C}_{25}\text{H}_{36}\text{O}_6\text{N}_7\text{P}_2$ , $\text{C}_{25}\text{H}_{29}\text{O}_4\text{N}_{12}\text{P}$ | 2.89                   | 592.2191              | 617.2988              | 1.1/4.0  | 25   |
| 4   | $\text{C}_{24}\text{H}_{34}\text{O}_4\text{N}_{13}\text{P}$ , $\text{C}_{24}\text{H}_{41}\text{O}_6\text{N}_8\text{P}_2$ | 6.82                   | 599.2596              | 623.3440              | 1.3/3.7  | 24   |
| 5   | $\text{C}_{26}\text{H}_{34}\text{O}_6\text{N}_7\text{P}_2$ , $\text{C}_{26}\text{H}_{27}\text{O}_4\text{N}_{12}\text{P}$ | 17.03                  | 602.2032              | 628.2947              | 1.4/3.6  | 26   |
| 6   | $\text{C}_{25}\text{H}_{32}\text{O}_4\text{N}_{13}\text{P}$ , $\text{C}_{25}\text{H}_{39}\text{O}_6\text{N}_8\text{P}_2$ | 19.53                  | 609.2457              | 634.3286              | 4.0/0.9  | 25   |
| 7   | $\text{C}_{26}\text{H}_{37}\text{O}_6\text{N}_8\text{P}_2$ , $\text{C}_{26}\text{H}_{30}\text{O}_4\text{N}_{13}\text{P}$ | 38.99                  | 619.2302              | 645.3178              | 0.7/4.2  | 26   |
| 8   | $\text{C}_{25}\text{H}_{41}\text{O}_7\text{N}_8\text{P}_2$ , $\text{C}_{25}\text{H}_{34}\text{O}_5\text{N}_{13}\text{P}$ | 22.79                  | 627.2562              | 652.3403              | 1.01/3.8 | 25   |
| 9   | $\text{C}_{26}\text{H}_{32}\text{O}_5\text{N}_{13}\text{P}$ , $\text{C}_{26}\text{H}_{39}\text{O}_7\text{N}_8\text{P}_2$ | 32.38                  | 637.2405              | 663.3270              | 1.0/3.8  | 26   |
| 10  | $\text{C}_{25}\text{H}_{48}\text{O}_{10}\text{N}_3\text{P}_3$                                                            | 4.40                   | 643.2547              | 668.3333              | 0.0      | 25   |
| 11  | $\text{C}_{28}\text{H}_{49}\text{O}_4\text{N}_{10}\text{P}_2$                                                            | 39.10                  | 651.3401              | 679.4352              | 1.1      | 28   |
| 12  | $\text{C}_{26}\text{H}_{41}\text{O}_8\text{N}_8\text{P}_2$ , $\text{C}_{26}\text{H}_{34}\text{O}_6\text{N}_{13}\text{P}$ | 81.82                  | 655.2512              | 681.3387              | 0.8/3.8  | 26   |
| 13  | $\text{C}_{28}\text{H}_{43}\text{O}_5\text{N}_{15}$                                                                      | 61.11                  | 669.3512              | 697.4460              | 8.1      | 28   |
| 14  | $\text{C}_{29}\text{H}_{39}\text{O}_5\text{N}_{15}$                                                                      | 10.77                  | 677.3213              | 706.4132              | 5.9      | 29   |
| 15  | $\text{C}_{29}\text{H}_{42}\text{O}_3\text{N}_{15}\text{P}$                                                              | 8.03                   | 679.3322              | 708.4325              | 0.8      | 29   |
| 16  | $\text{C}_{29}\text{H}_{43}\text{O}_5\text{N}_{15}$                                                                      | 5.92                   | 681.3550              | 710.4467              | 2.3      | 29   |
| 17  | $\text{C}_{28}\text{H}_{45}\text{O}_6\text{N}_{15}$                                                                      | 31.72                  | 687.3615              | 715.4541              | 8.2      | 28   |
| 18  | $\text{C}_{30}\text{H}_{39}\text{O}_5\text{N}_{15}$                                                                      | 37.26                  | 689.3188              | 719.4215              | 9.4      | 30   |
| 19  | $\text{C}_{29}\text{H}_{44}\text{O}_4\text{N}_{15}\text{P}$                                                              | 6.22                   | 697.3442              | 726.4453              | 1.3      | 29   |
| 20  | $\text{C}_{30}\text{H}_{41}\text{O}_6\text{N}_{15}$                                                                      | 100.00                 | 707.3299              | 737.4301              | 8.5      | 30   |
| 21  | $\text{C}_{30}\text{H}_{43}\text{O}_7\text{N}_{15}$                                                                      | 57.90                  | 725.3409              | 755.4415              | 7.6      | 30   |
| 22  | $\text{C}_{30}\text{H}_{50}\text{O}_8\text{N}_9\text{P}_2$                                                               | 11.49                  | 726.3251              | 756.4257              | 0.1      | 30   |

\* no elemental composition could be calculated for the neutral loss mass, molecular formula with the lowest mass deviation is presented

**Figure S-63.** Product ion spectra, fragment ion EICs and list of all FragExtract derived fragment ions for  $m/z$  787.5031 at a CE of 35%

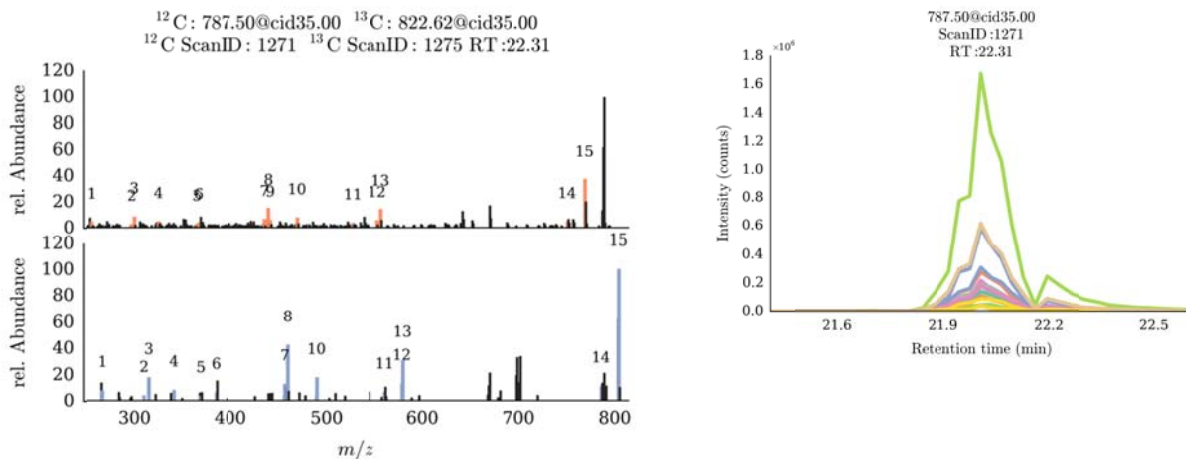

| No. | Molecular formula                                            | Relative abundance [%] | $^{12}\text{C}$ $m/z$ | $^{13}\text{C}$ $m/z$ | ppm   | n(C) |
|-----|--------------------------------------------------------------|------------------------|-----------------------|-----------------------|-------|------|
| 1   | $\text{C}_{11}\text{H}_{18}\text{O}_4\text{N}_3$             | 7.55                   | 256.1297              | 267.1664              | 1.9   | 11   |
| 2   | $\text{C}_{13}\text{H}_{21}\text{O}_4\text{N}_4$             | 2.75                   | 297.1548              | 310.1974              | 3.0   | 13   |
| 3   | $\text{C}_{15}\text{H}_{30}\text{O}_3\text{N}_3$             | 18.77                  | 300.2287              | 315.2783              | 1.8   | 15   |
| 4   | $\text{C}_{16}\text{H}_{29}\text{O}_3\text{N}_4$             | 8.61                   | 325.2236              | 341.2797              | 0.7   | 16   |
| 5   | $\text{C}_4\text{H}_{31}\text{O}_{10}\text{N}_9$             | 3.02                   | 365.2190              | 369.2298              | 0.5   | 4    |
| 6   | $\text{C}_{18}\text{H}_{31}\text{O}_4\text{N}_4$             | 6.58                   | 367.2341              | 385.2920              | 0.2   | 18   |
| 7   | $\text{C}_{21}\text{H}_{34}\text{O}_5\text{N}_5$             | 13.28                  | 436.2581              | 457.3263              | 6.1   | 21   |
| 8   | $\text{C}_{20}\text{H}_{34}\text{O}_6\text{N}_5$             | 37.30                  | 440.2508              | 460.3174              | 0.9   | 20   |
| 9   | $\text{C}_{15}\text{H}_{39}\text{O}_5\text{N}_8\text{P}$ , * | 11.71                  | 442.2780              | 457.3263              | 1.1/* | 15   |
| 10  | $\text{C}_{20}\text{H}_{36}\text{O}_6\text{N}_7$             | 16.73                  | 470.2727              | 490.3398              | 1.2   | 20   |
| 11  | $\text{C}_{34}\text{H}_{35}\text{N}_6$                       | 5.61                   | 527.2935              | 561.4027              | 3.3   | 34   |
| 12  | $\text{C}_{26}\text{H}_{45}\text{O}_7\text{N}_6$             | 10.81                  | 553.3348              | 579.4205              | 0.7   | 26   |
| 13  | $\text{C}_{23}\text{H}_{41}\text{O}_8\text{N}_8$             | 35.09                  | 557.3046              | 580.3846              | 0.8   | 23   |
| 14  | $\text{C}_{35}\text{H}_{63}\text{O}_8\text{N}_{10}$          | 8.70                   | 751.4826              | 786.5923              | 0.2   | 35   |
| 15  | $\text{C}_{35}\text{H}_{65}\text{O}_9\text{N}_{10}$          | 100.00                 | 769.4943              | 804.6111              | 1.6   | 35   |

\* no elemental composition could be calculated for the neutral loss mass, molecular formula with the lowest mass deviation is presented

**Figure S-64.** Product ion spectra, fragment ion EICs and list of all FragExtract derived fragment ions for  $m/z$  877.375 at a CE of 35%

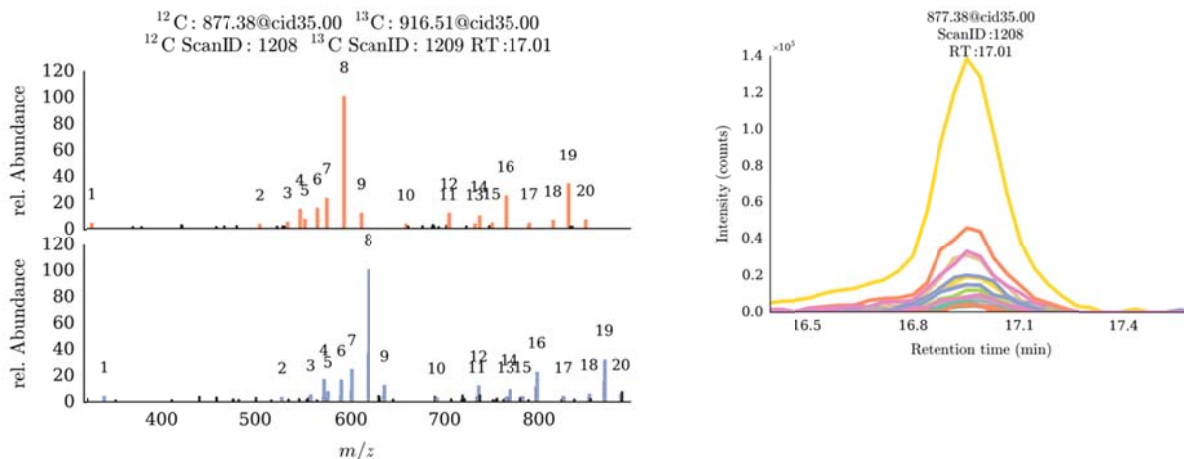

| No. | Molecular formula                                                | Relative abundance [%] | $^{12}\text{C}$ $m/z$ | $^{13}\text{C}$ $m/z$ | ppm   | n(C) |
|-----|------------------------------------------------------------------|------------------------|-----------------------|-----------------------|-------|------|
| 1   | $\text{C}_{13}\text{H}_{21}\text{O}_2\text{N}_4\text{P}_2$       | 3.18                   | 327.1135              | 340.1575              | 0.3   | 13   |
| 2   | $\text{C}_{23}\text{H}_{38}\text{O}_{10}\text{P}$                | 2.28                   | 505.2199              | 528.2996              | 0.3   | 23   |
| 3   | $\text{C}_{24}\text{H}_{34}\text{O}_5\text{N}_5\text{P}_2$       | 3.95                   | 534.2030              | 558.2822              | 0.1   | 24   |
| 4   | $\text{C}_{25}\text{H}_{37}\text{O}_4\text{N}_6\text{P}_2$       | 13.77                  | 547.2343              | 572.3174              | 0.5   | 25   |
| 5   | $\text{C}_{24}\text{H}_{36}\text{O}_6\text{N}_5\text{P}_2$       | 6.07                   | 552.2122              | 576.2914              | 2.4   | 24   |
| 6   | $\text{C}_{25}\text{H}_{39}\text{O}_5\text{N}_6\text{P}_2$       | 14.47                  | 565.2446              | 590.3286              | 1.0   | 25   |
| 7   | $\text{C}_{26}\text{H}_{37}\text{O}_5\text{N}_6\text{P}_2$       | 22.24                  | 575.2289              | 601.3160              | 1.1   | 26   |
| 8   | $\text{C}_{26}\text{H}_{39}\text{O}_6\text{N}_6\text{P}_2$       | 100.00                 | 593.2394              | 619.3262              | 1.2   | 26   |
| 9   | $\text{C}_{26}\text{H}_{41}\text{O}_7\text{N}_6\text{P}_2$       | 10.66                  | 611.2505              | 637.3368              | 0.2   | 26   |
| 10  | $\text{C}_{32}\text{H}_{46}\text{O}_7\text{N}_4\text{P}_2$       | 2.41                   | 660.2834              | 692.3959              | 0.4   | 32   |
| 11  | $\text{C}_{30}\text{H}_{58}\text{ON}_6\text{P}_6$ ,*             | 2.45                   | 704.3085              | 734.4025              | 1.1/* | 30   |
| 12  | $\text{C}_{31}\text{H}_{47}\text{O}_7\text{N}_8\text{P}_2$       | 10.83                  | 705.2997              | 736.4063              | 5.7   | 31   |
| 13  | $\text{C}_{33}\text{H}_{61}\text{ON}_3\text{P}_7$ ,*             | 2.52                   | 732.2970              | 765.4107              | 0.4/* | 33   |
| 14  | $\text{C}_{32}\text{H}_{51}\text{O}_8\text{N}_8\text{P}_2$ ,*    | 8.66                   | 737.3309              | 769.4375              | 1.2/* | 32   |
| 15  | $\text{C}_{33}\text{H}_{57}\text{O}_{11}\text{N}_2\text{P}_3$ ,* | 3.21                   | 750.3168              | 783.4226              | 0.3/* | 33   |
| 16  | $\text{C}_{33}\text{H}_{56}\text{O}_2\text{N}_9\text{P}_5$ ,*    | 23.86                  | 765.3242              | 798.4343              | 0.3/* | 33   |
| 17  | $\text{C}_{36}\text{H}_{54}\text{O}_9\text{N}_7\text{P}_2$       | 3.22                   | 790.3392              | 826.4662              | 7.7   | 36   |
| 18  | $\text{C}_{38}\text{H}_{57}\text{O}_8\text{N}_8\text{P}_2$       | 5.23                   | 815.3688              | 853.5005              | 9.9   | 38   |
| 19  | $\text{C}_{38}\text{H}_{57}\text{O}_9\text{N}_8\text{P}_2$       | 33.15                  | 831.3703              | 869.4990              | 1.8   | 38   |
| 20  | $\text{C}_{37}\text{H}_{75}\text{O}_9\text{P}_6$ ,*              | 5.64                   | 849.3829              | 886.5046              | 0.2/* | 37   |

\* no elemental composition could be calculated for the neutral loss mass, molecular formula with the lowest mass deviation is presented

**Figure S-65.** Product ion spectra, fragment ion EICs and list of all FragExtract derived fragment ions for  $m/z$  790.3163 at a CE of 35%

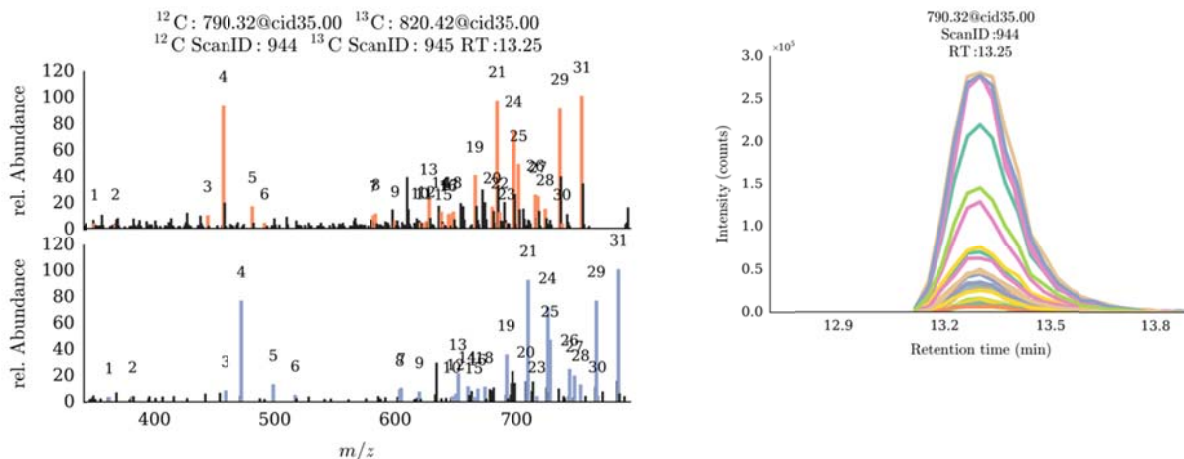

| No. | Molecular formula                                                                                                               | rel. intensity [%] | $^{12}\text{C}$ $m/z$ | $^{13}\text{C}$ $m/z$ | ppm      | n(C) |
|-----|---------------------------------------------------------------------------------------------------------------------------------|--------------------|-----------------------|-----------------------|----------|------|
| 1   | $\text{C}_{12}\text{H}_{13}\text{O}_6\text{N}_3\text{Fe}$                                                                       | 2.58               | 351.0153              | 363.0555              | 1.32     | 12   |
| 2   | $\text{C}_{14}\text{H}_{18}\text{N}_9\text{Fe},^*$                                                                              | 2.85               | 368.1026              | 382.1494              | 9.0/*    | 14   |
| 3   | $\text{C}_{15}\text{H}_{22}\text{O}_9\text{N}_7$                                                                                | 8.86               | 444.1444              | 459.1927              | 6.6      | 15   |
| 4   | $\text{C}_{16}\text{H}_{27}\text{O}_7\text{N}_5\text{Fe}, \text{C}_{16}\text{H}_{39}\text{O}_2\text{NP}_4\text{Fe}$             | 92.88              | 457.1258              | 473.1788              | 0.8/3.7  | 16   |
| 5   | $\text{C}_{17}\text{H}_{26}\text{O}_7\text{N}_6\text{Fe}, \text{C}_{17}\text{H}_{38}\text{O}_2\text{N}_2\text{P}_4\text{Fe}$    | 15.70              | 482.1207              | 499.1785              | 0.1/4.2  | 17   |
| 6   | $\text{C}_{25}\text{H}_{14}\text{O}_5\text{N}_7, \text{C}_{25}\text{H}_{26}\text{N}_3\text{P}_4$                                | 3.11               | 492.1054              | 517.1887              | 0.6/3.6  | 25   |
| 7   | $\text{C}_{23}\text{H}_{50}\text{O}_3\text{N}_2\text{P}_4\text{Fe}, \text{C}_{23}\text{H}_{38}\text{O}_8\text{N}_6\text{Fe}$    | 8.87               | 582.2112              | 605.2850              | 0.7/2.9  | 23   |
| 8   | $\text{C}_{20}\text{H}_{28}\text{O}_{11}\text{N}_6\text{Fe}, \text{C}_{20}\text{H}_{40}\text{O}_6\text{N}_2\text{P}_4\text{Fe}$ | 10.15              | 584.1156              | 604.1823              | 0.7/4.3  | 20   |
| 9   | $\text{C}_{20}\text{H}_{54}\text{O}_7\text{NP}_4\text{Fe}, \text{C}_{20}\text{H}_{42}\text{O}_{12}\text{N}_5\text{Fe}$          | 5.06               | 600.2189              | 620.2891              | 0.9/2.6  | 20   |
| 10  | $\text{C}_{26}\text{H}_{37}\text{O}_{10}\text{N}_4\text{Fe}, \text{C}_{26}\text{H}_{49}\text{O}_5\text{P}_4\text{Fe}$           | 3.43               | 621.1844              | 647.2700              | 1.5/4.8  | 26   |
| 11  | $\text{C}_{23}\text{H}_{34}\text{N}_{14}\text{P}_2\text{Fe},^*$                                                                 | 3.11               | 624.1911              | 647.2700              | 0.2/*    | 23   |
| 12  | $\text{C}_{24}\text{H}_{50}\text{O}_5\text{N}_2\text{P}_4\text{Fe}, \text{C}_{24}\text{H}_{38}\text{O}_{10}\text{N}_6\text{Fe}$ | 4.60               | 626.2012              | 650.2781              | 0.3/3.0  | 24   |
| 13  | $\text{C}_{24}\text{H}_{40}\text{O}_{10}\text{N}_6\text{Fe}, \text{C}_{24}\text{H}_{52}\text{O}_5\text{N}_2\text{P}_4\text{Fe}$ | 21.88              | 628.2158              | 652.2931              | 1.2/2.1  | 24   |
| 14  | $\text{C}_{22}\text{H}_{44}\text{O}_2\text{N}_8\text{P}_6,^*$                                                                   | 11.60              | 638.2008              | 660.2736              | 0.1/*    | 22   |
| 15  | $\text{C}_{25}\text{H}_{52}\text{O}_5\text{N}_2\text{P}_4\text{Fe}, \text{C}_{25}\text{H}_{40}\text{O}_{10}\text{N}_6\text{Fe}$ | 2.66               | 640.2162              | 665.3029              | 1.4/1.9  | 25   |
| 16  | $\text{C}_{24}\text{H}_{52}\text{O}_6\text{N}_2\text{P}_4\text{Fe}, \text{C}_{24}\text{H}_{40}\text{O}_{11}\text{N}_6\text{Fe}$ | 9.45               | 644.2112              | 668.2872              | 1.25/2.1 | 24   |
| 17  | $\text{C}_{23}\text{H}_{51}\text{O}_6\text{N}_3\text{P}_4\text{Fe}, \text{C}_{23}\text{H}_{39}\text{O}_{11}\text{N}_7\text{Fe}$ | 9.96               | 645.2077              | 668.2872              | 0.7/4.0  | 23   |
| 18  | $\text{C}_{26}\text{H}_{31}\text{O}_{11}\text{N}_7\text{P},^*$                                                                  | 11.75              | 648.1819              | 674.2719              | 0.9/*    | 26   |
| 19  | $\text{C}_{26}\text{H}_{38}\text{O}_{11}\text{N}_6\text{Fe}, \text{C}_{26}\text{H}_{50}\text{O}_6\text{N}_2\text{P}_4\text{Fe}$ | 39.41              | 666.1948              | 692.2816              | 0.8/2.4  | 26   |
| 20  | $\text{C}_{28}\text{H}_{48}\text{O}_8\text{N}_8\text{Fe}, \text{C}_{28}\text{H}_{60}\text{O}_3\text{N}_4\text{P}_4\text{Fe}$    | 15.30              | 680.2938              | 708.3848              | 0.1/3.2  | 28   |
| 21  | $\text{C}_{26}\text{H}_{40}\text{O}_{12}\text{N}_6\text{Fe}$                                                                    | 96.33              | 684.2048              | 710.2918              | 0.0      | 26   |
| 22  | $\text{C}_{22}\text{H}_{44}\text{O}_{14}\text{N}_{11}$                                                                          | 11.41              | 686.3064              | 708.3848              | 0.0      | 22   |
| 23  | $\text{C}_{25}\text{H}_{61}\text{O}_{11}\text{P}_5$                                                                             | 3.07               | 692.2897              | 717.3715              | 0.1      | 25   |
| 24  | $\text{C}_{28}\text{H}_{50}\text{O}_9\text{N}_8\text{Fe}, \text{C}_{28}\text{H}_{62}\text{O}_4\text{N}_4\text{P}_4\text{Fe}$    | 73.88              | 698.3050              | 726.3978              | 0.8/2.2  | 28   |

|    |                                                                                                                                                    |        |          |          |         |    |
|----|----------------------------------------------------------------------------------------------------------------------------------------------------|--------|----------|----------|---------|----|
| 25 | C <sub>26</sub> H <sub>42</sub> O <sub>13</sub> N <sub>6</sub> Fe, C <sub>26</sub> H <sub>54</sub> O <sub>8</sub> N <sub>2</sub> P <sub>4</sub> Fe | 47.79  | 702.2152 | 728.3026 | 0.2/3.2 | 26 |
| 26 | C <sub>28</sub> H <sub>52</sub> O <sub>10</sub> N <sub>8</sub> Fe                                                                                  | 24.63  | 716.3150 | 744.4077 | 0.0     | 28 |
| 27 | C <sub>30</sub> H <sub>46</sub> O <sub>9</sub> N <sub>8</sub> Fe                                                                                   | 23.38  | 718.2735 | 748.3731 | 0.5     | 30 |
| 28 | C <sub>29</sub> H <sub>48</sub> O <sub>10</sub> N <sub>8</sub> Fe                                                                                  | 13.80  | 724.2837 | 753.3824 | 0.1     | 29 |
| 29 | C <sub>30</sub> H <sub>48</sub> O <sub>10</sub> N <sub>8</sub> Fe                                                                                  | 90.80  | 736.2837 | 766.3844 | 0.1     | 30 |
| 30 | C <sub>29</sub> H <sub>58</sub> O <sub>6</sub> N <sub>4</sub> P <sub>4</sub> Fe                                                                    | 2.68   | 738.2684 | 767.3695 | 4.5     | 29 |
| 31 | C <sub>30</sub> H <sub>50</sub> O <sub>11</sub> N <sub>8</sub> Fe, C <sub>30</sub> H <sub>62</sub> O <sub>6</sub> N <sub>4</sub> P <sub>4</sub> Fe | 100.00 | 754.2943 | 784.3955 | 0.1/2.8 | 30 |

‘\*’ no elemental composition could be calculated for the neutral loss mass, molecular formula with the lowest mass deviation is presented

#### References:

- (1) Kind, T.; Fiehn, O. *BMC Bioinformatics* **2007**, *8*, 105.
- (2) Bueschl, C.; Kluger, B.; Berthiller, F.; Lirk, G.; Winkler, S.; Krska, R.; Schuhmacher, R. *Bioinformatics* **2012**, *28*, 736-738.
- (3) Bueschl, C.; Kluger, B.; Lemmens, M.; Adam, G.; Wiesenberger, G.; Maschietto, V.; Marocco, A.; Strauss, J.; Bödi, S.; Thallinger, G.; Krska, R.; Schuhmacher, R. *Metabolomics* **2013**, 1-16.
